# Supplementary material for: Common dolphin whistle responses to experimental mid-frequency sonar
Source: PubMed Central journal article supplement (PMC11051594; doi:10.1371/journal.pone.0302035), 2024-04-26

# whistles over time

raw whistle counts at 1 second resolution

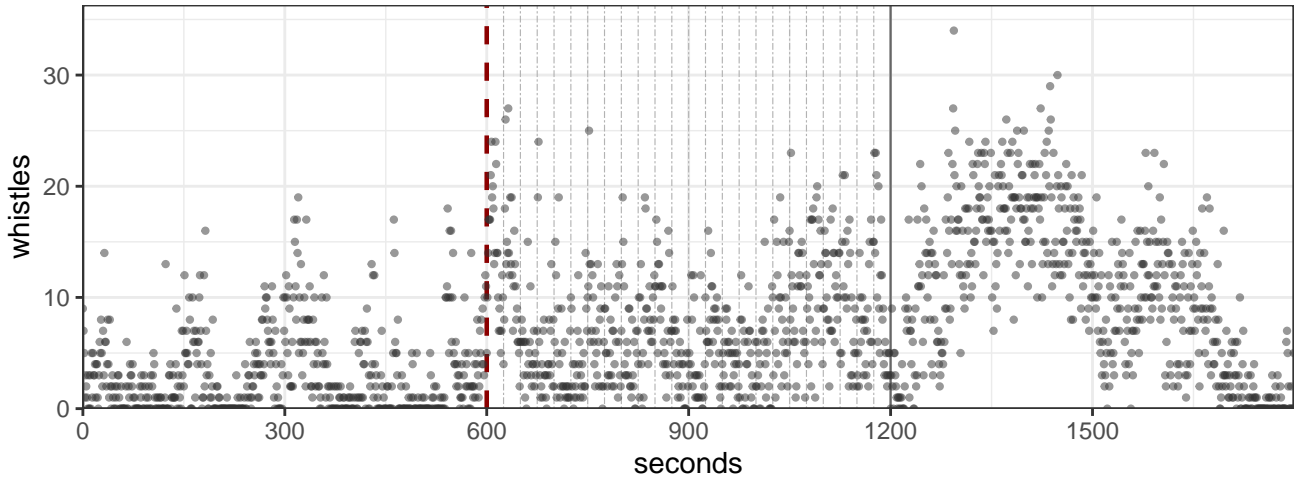

# whistles over time

raw whistle counts at 1 second resolution

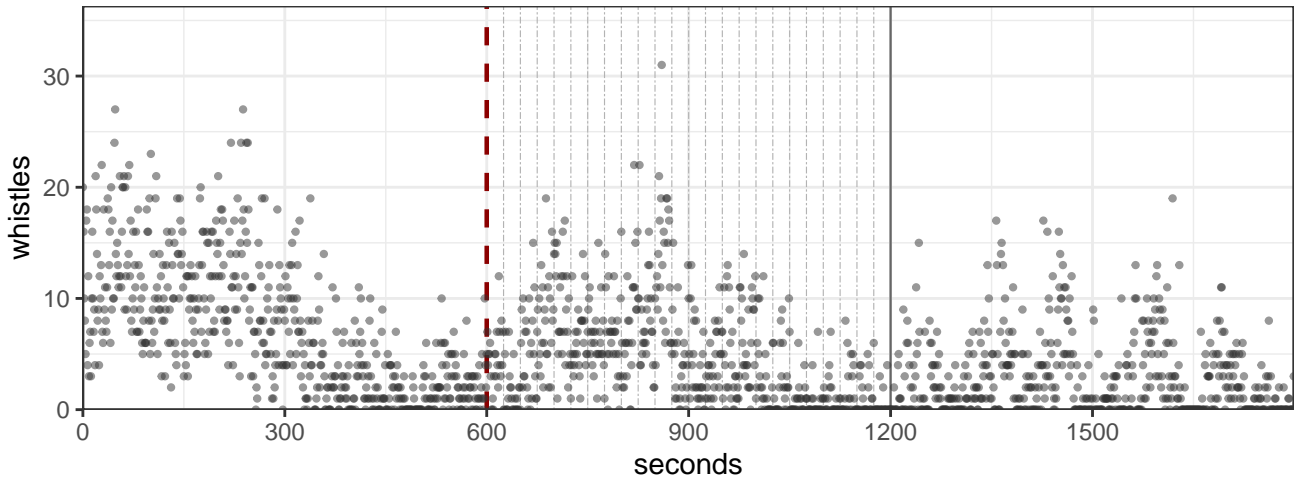

# whistles over time

raw whistle counts at 1 second resolution

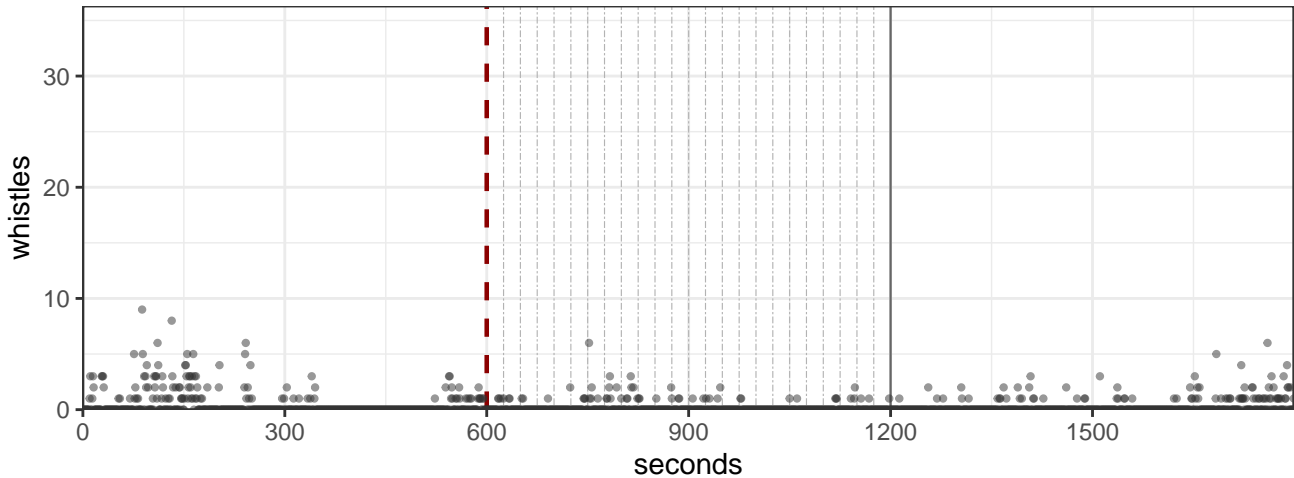

# whistles over time

raw whistle counts at 1 second resolution

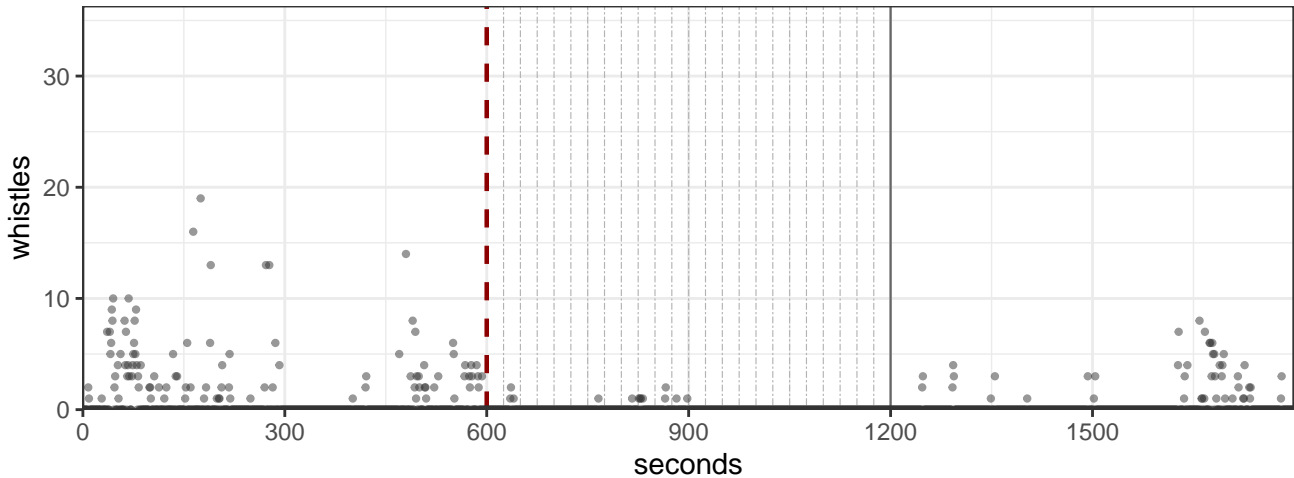

# whistles over time

raw whistle counts at 1 second resolution

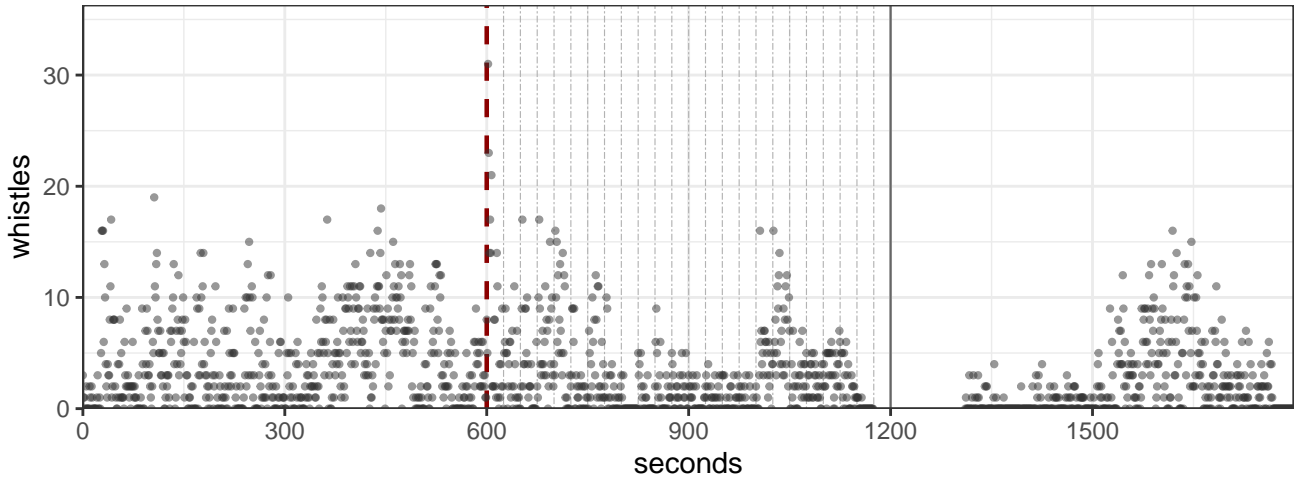

# whistles over time

raw whistle counts at 1 second resolution

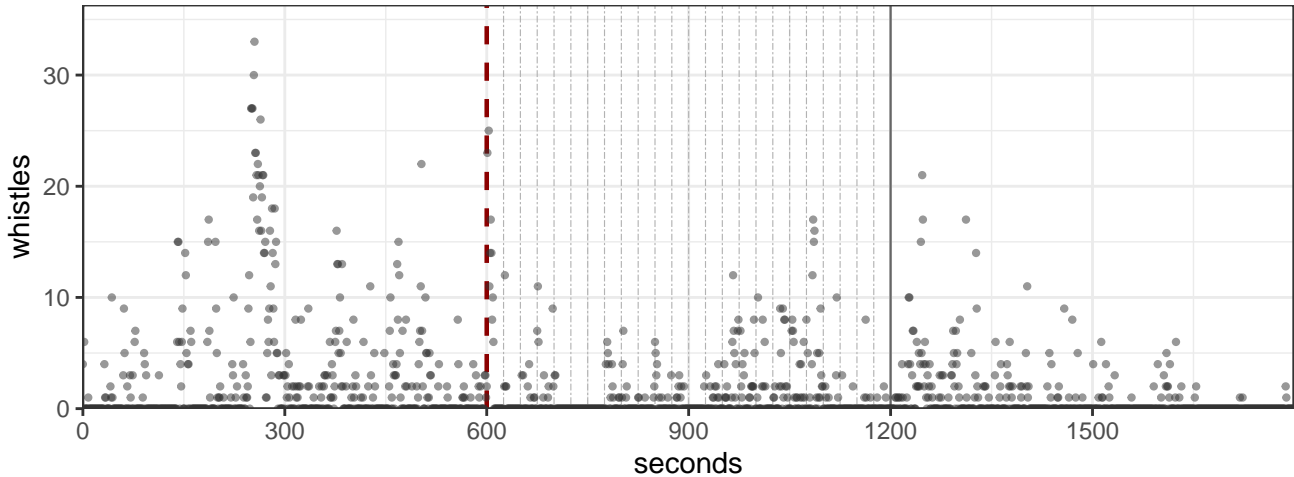

# whistles over time

raw whistle counts at 1 second resolution

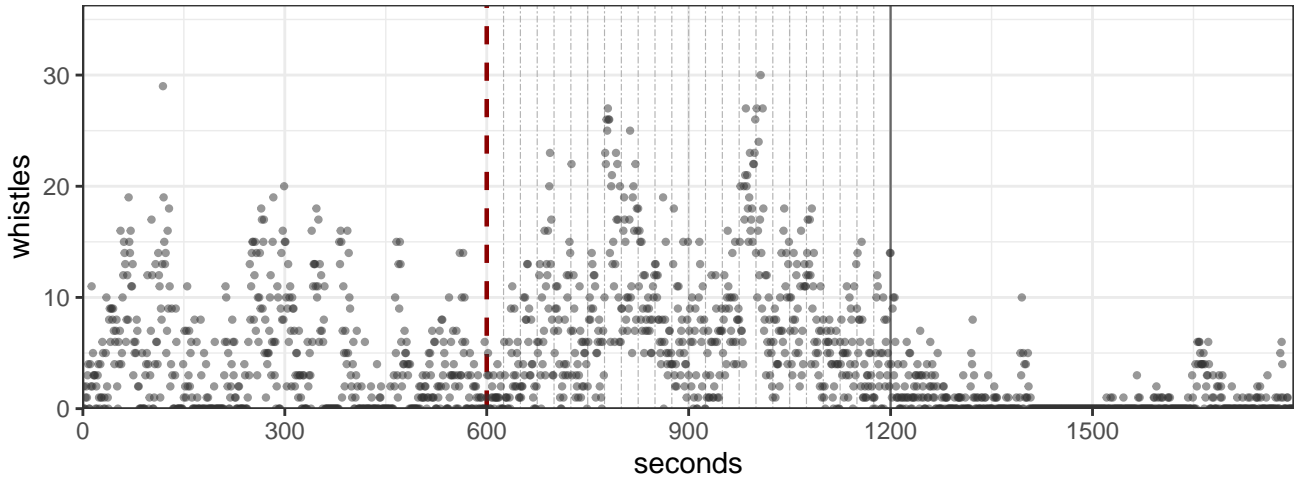

# whistles over time

raw whistle counts at 1 second resolution

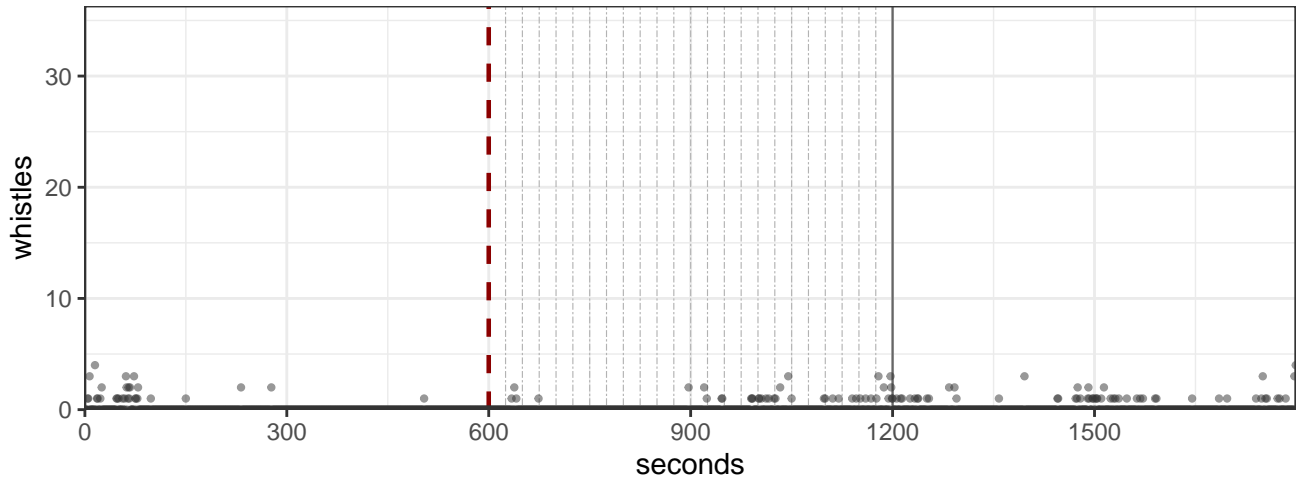



# whistles over time

raw whistle counts at 1 second resolution

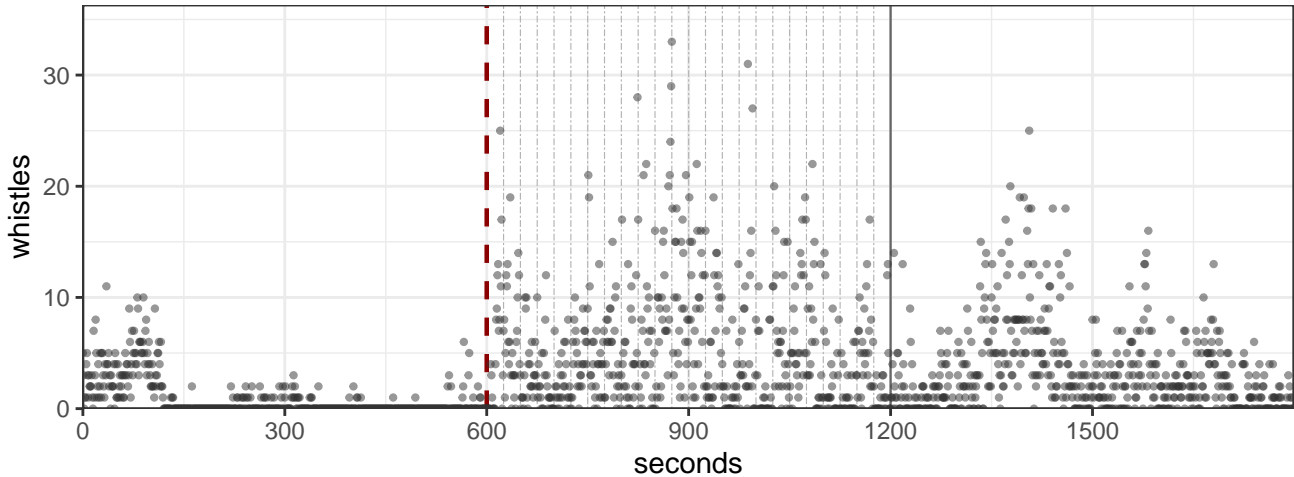

# whistles over time

raw whistle counts at 1 second resolution

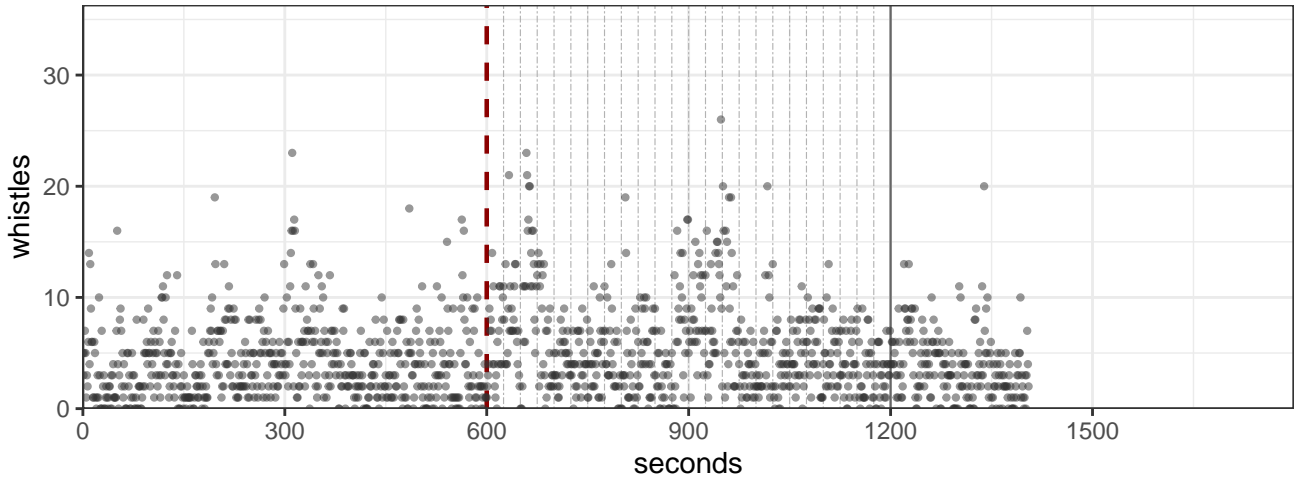

# whistles over time

raw whistle counts at 1 second resolution

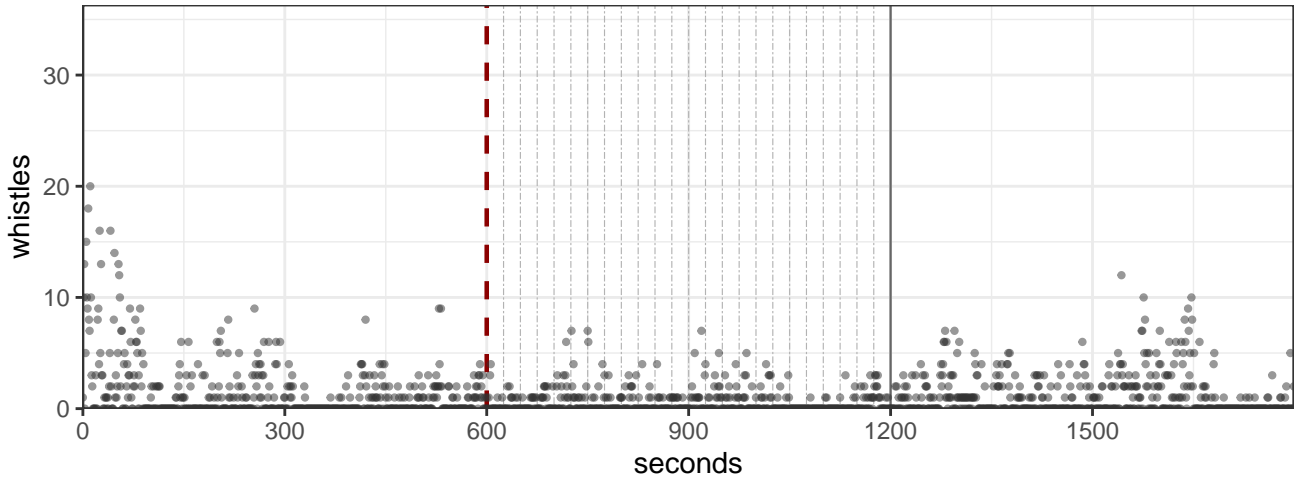

# whistles over time

raw whistle counts at 1 second resolution

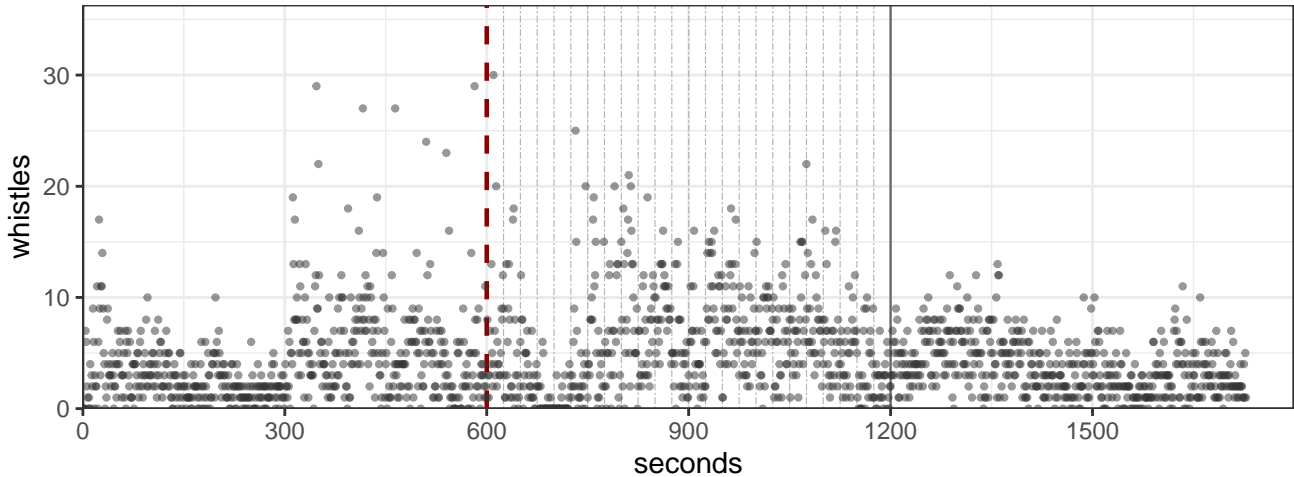

# whistles over time

raw whistle counts at 1 second resolution

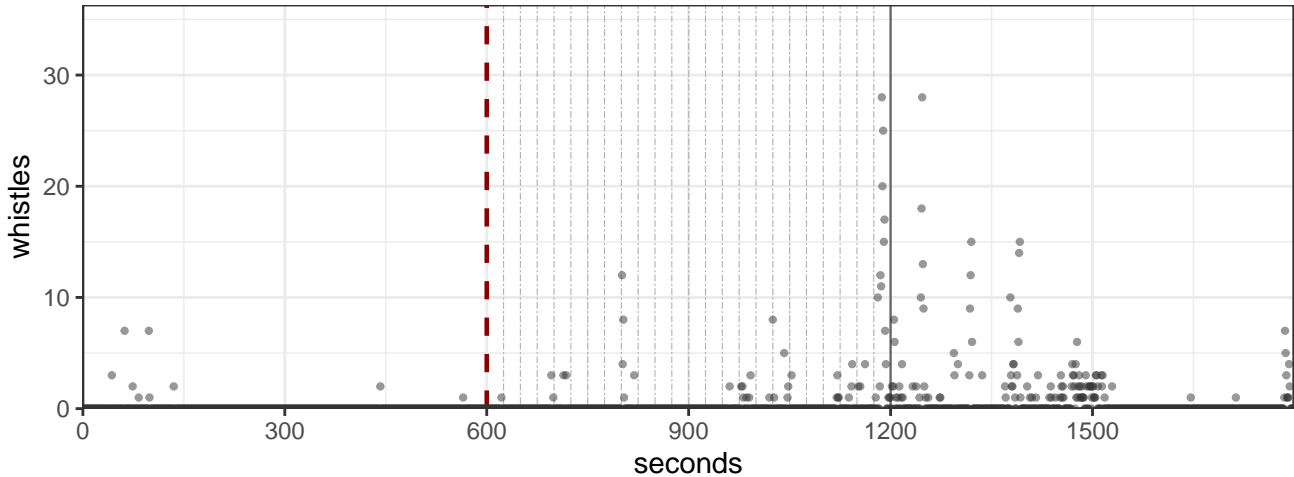

# whistles over time

raw whistle counts at 1 second resolution

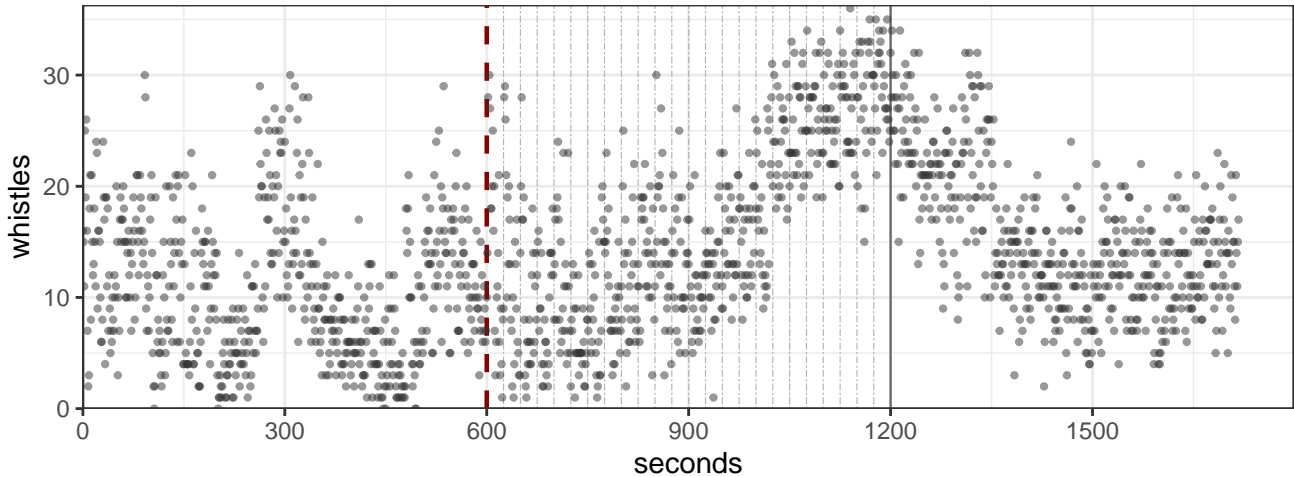

# whistles over time

raw whistle counts at 1 second resolution

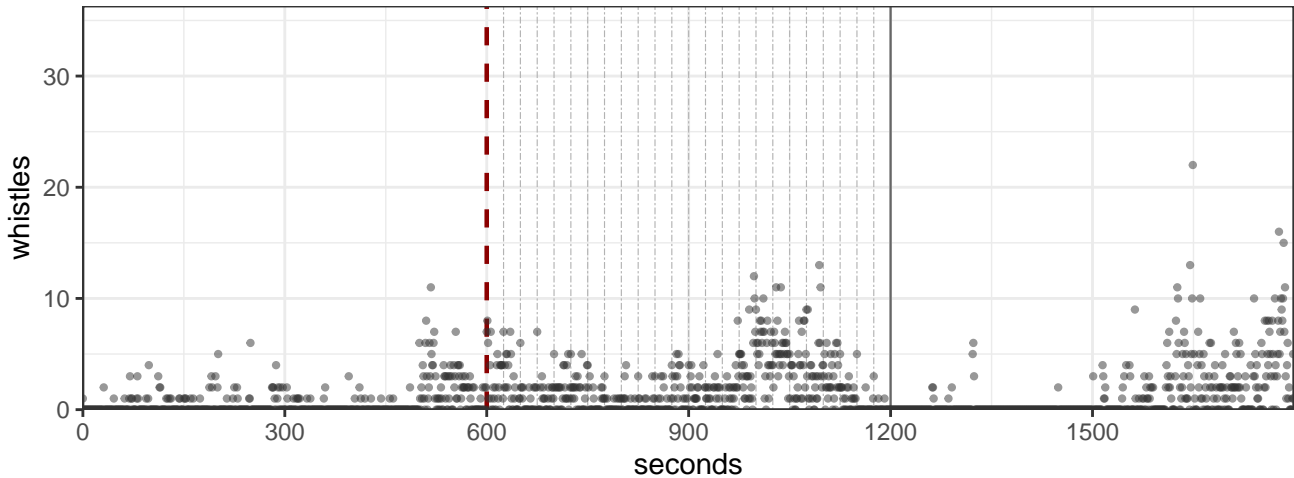

# whistles over time

raw whistle counts at 1 second resolution

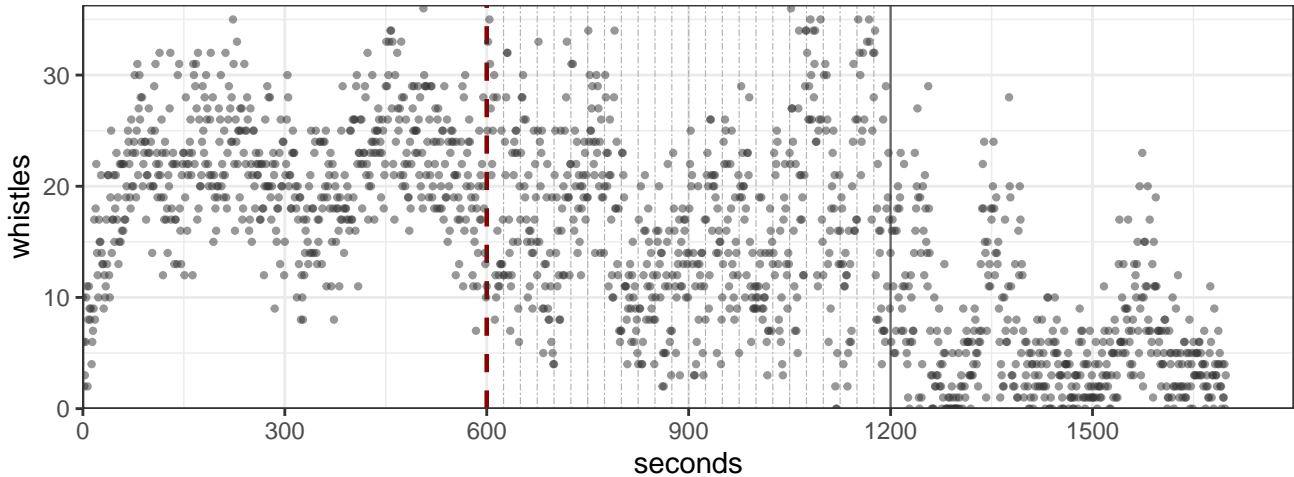



# whistles over time

raw whistle counts at 1 second resolution

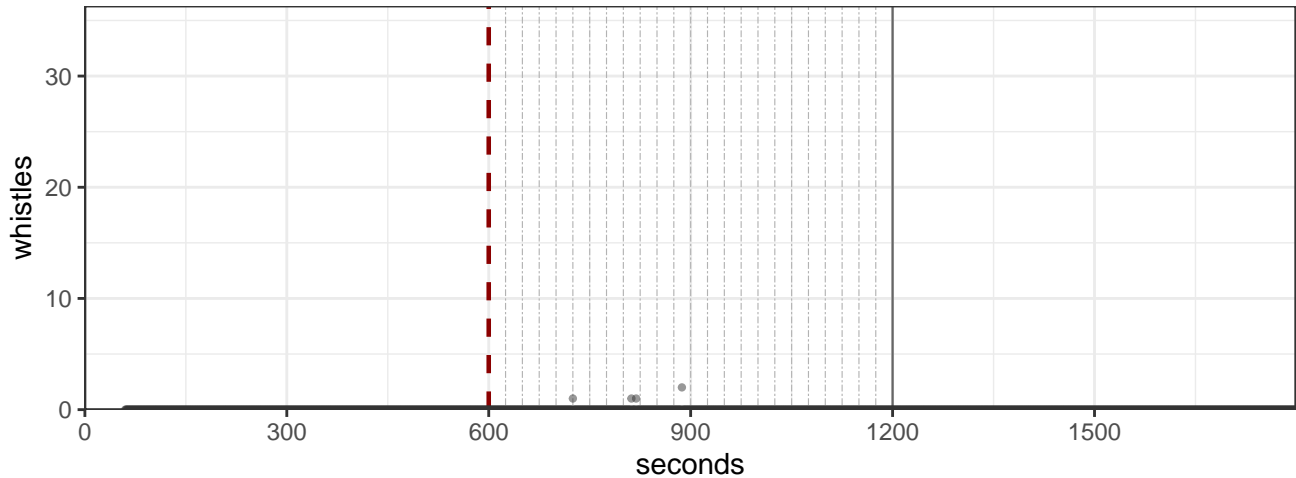

# whistles over time

raw whistle counts at 1 second resolution

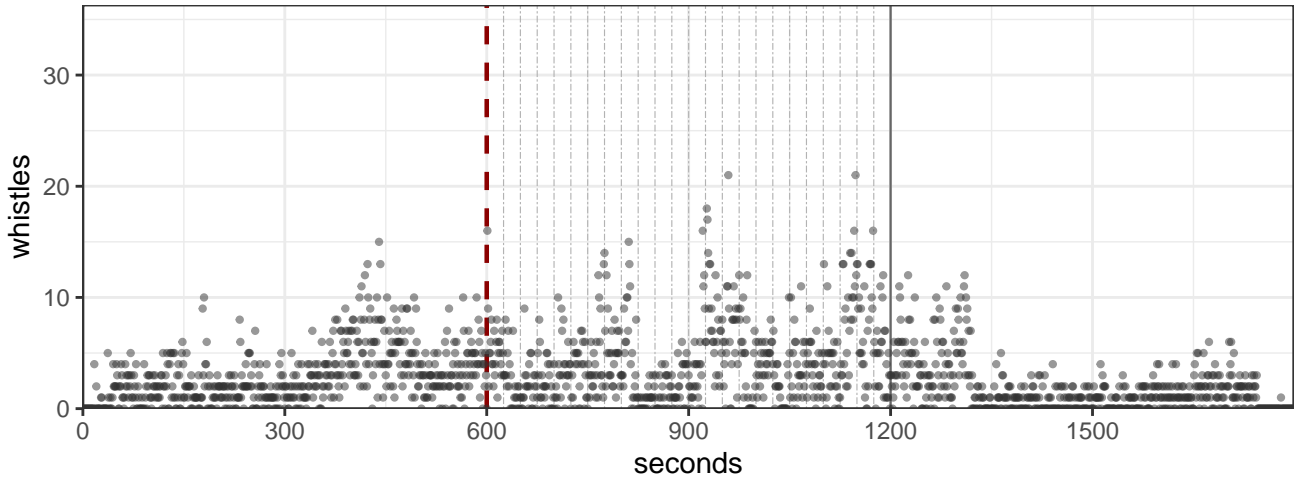

# whistles over time

raw whistle counts at 1 second resolution

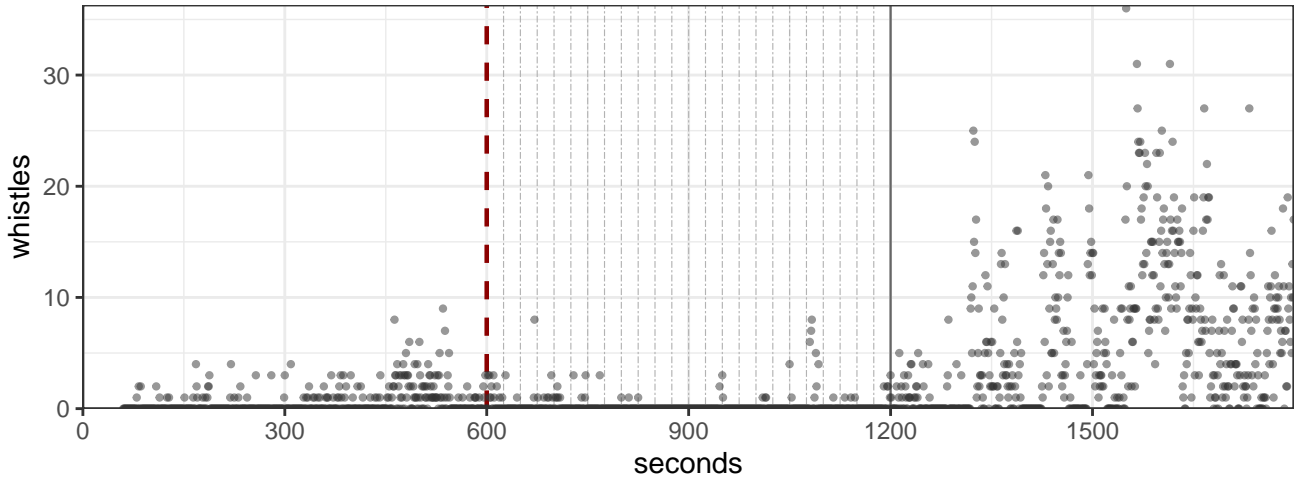

Supplement: pone.0302035.s002.pdf [file pone.0302035.s002.pdf]
