# Supplementary material for: Common dolphin whistle responses to experimental mid-frequency sonar
Source: PubMed Central journal article supplement (PMC11051594; doi:10.1371/journal.pone.0302035), 2024-04-26

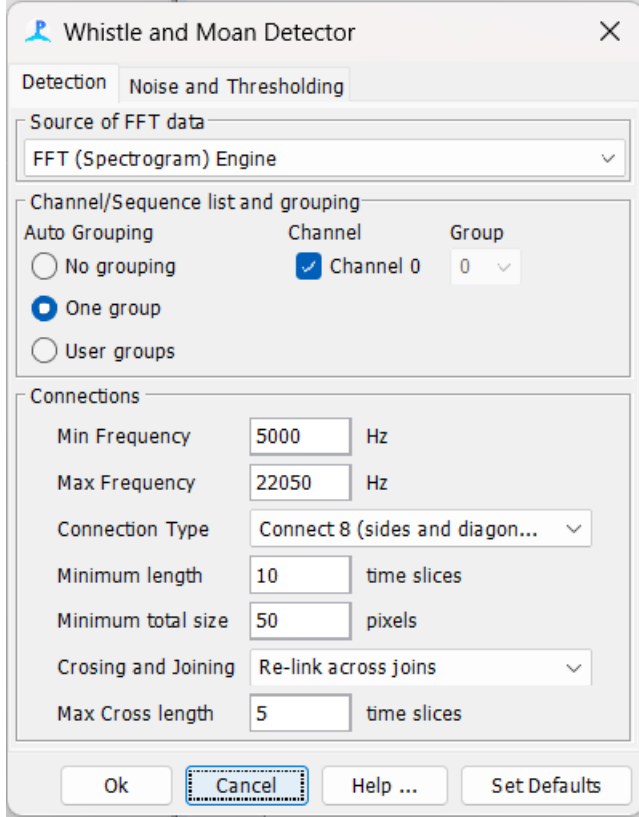

Supplement: pone.0302035.s001.pdf [file pone.0302035.s001.pdf]
