# Supplementary material for: Common dolphin whistle responses to experimental mid-frequency sonar
Source: PubMed Central journal article supplement (PMC11051594; doi:10.1371/journal.pone.0302035), 2024-04-26
Supplement: pone.0302035.s008.pdf [file pone.0302035.s008.pdf]

# PLOS ONE

## Common dolphin whistle responses to experimental mid-frequency sonar

--Manuscript Draft--

|                               |                                                                                                                                                                                                                                                                                                                                                                                                                                                                                                                                                                                                                                                                                                                                                                                                                                                                                                                                                                                                                                                                                                                                                                                                                                                                                                                                                                                                                                                                                                                                                                                                                                                                                                                                                                                                                                                                                                                                                                                                                          |
|-------------------------------|--------------------------------------------------------------------------------------------------------------------------------------------------------------------------------------------------------------------------------------------------------------------------------------------------------------------------------------------------------------------------------------------------------------------------------------------------------------------------------------------------------------------------------------------------------------------------------------------------------------------------------------------------------------------------------------------------------------------------------------------------------------------------------------------------------------------------------------------------------------------------------------------------------------------------------------------------------------------------------------------------------------------------------------------------------------------------------------------------------------------------------------------------------------------------------------------------------------------------------------------------------------------------------------------------------------------------------------------------------------------------------------------------------------------------------------------------------------------------------------------------------------------------------------------------------------------------------------------------------------------------------------------------------------------------------------------------------------------------------------------------------------------------------------------------------------------------------------------------------------------------------------------------------------------------------------------------------------------------------------------------------------------------|
| <b>Manuscript Number:</b>     | PONE-D-23-38783R1                                                                                                                                                                                                                                                                                                                                                                                                                                                                                                                                                                                                                                                                                                                                                                                                                                                                                                                                                                                                                                                                                                                                                                                                                                                                                                                                                                                                                                                                                                                                                                                                                                                                                                                                                                                                                                                                                                                                                                                                        |
| <b>Article Type:</b>          | Research Article                                                                                                                                                                                                                                                                                                                                                                                                                                                                                                                                                                                                                                                                                                                                                                                                                                                                                                                                                                                                                                                                                                                                                                                                                                                                                                                                                                                                                                                                                                                                                                                                                                                                                                                                                                                                                                                                                                                                                                                                         |
| <b>Full Title:</b>            | Common dolphin whistle responses to experimental mid-frequency sonar                                                                                                                                                                                                                                                                                                                                                                                                                                                                                                                                                                                                                                                                                                                                                                                                                                                                                                                                                                                                                                                                                                                                                                                                                                                                                                                                                                                                                                                                                                                                                                                                                                                                                                                                                                                                                                                                                                                                                     |
| <b>Short Title:</b>           | Dolphin acoustic response to sonar                                                                                                                                                                                                                                                                                                                                                                                                                                                                                                                                                                                                                                                                                                                                                                                                                                                                                                                                                                                                                                                                                                                                                                                                                                                                                                                                                                                                                                                                                                                                                                                                                                                                                                                                                                                                                                                                                                                                                                                       |
| <b>Corresponding Author:</b>  | Caroline Casey<br>UCSC: University of California Santa Cruz<br>Santa Cruz, UNITED STATES                                                                                                                                                                                                                                                                                                                                                                                                                                                                                                                                                                                                                                                                                                                                                                                                                                                                                                                                                                                                                                                                                                                                                                                                                                                                                                                                                                                                                                                                                                                                                                                                                                                                                                                                                                                                                                                                                                                                 |
| <b>Keywords:</b>              | Bioacoustics; Common dolphins; ( <i>Delphinus delphis</i> ); ( <i>Delphinus bairdii</i> ); Behavioral response study; Navy sonar; Acoustic behavior                                                                                                                                                                                                                                                                                                                                                                                                                                                                                                                                                                                                                                                                                                                                                                                                                                                                                                                                                                                                                                                                                                                                                                                                                                                                                                                                                                                                                                                                                                                                                                                                                                                                                                                                                                                                                                                                      |
| <b>Abstract:</b>              | <p>Oceanic delphinids around naval operations are regularly exposed to intense military sonar broadcast within the frequency range of their hearing. However, empirically measuring the impact of sonar on the behavior of highly social, free-ranging dolphins is challenging. Additionally, baseline variability or the frequency of vocal state-switching among social oceanic dolphins during undisturbed conditions is lacking, making it difficult to attribute changes in vocal behavior to anthropogenic disturbance. Using a network of drifting acoustic buoys in controlled exposure experiments, we investigated the effects of mid-frequency (3-4 kHz) active sonar (MFAS) on whistle production in short-beaked (<i>Delphinus delphis delphis</i>) and long-beaked common dolphins (<i>Delphinus delphis bairdii</i>) in southern California. Given the complexity of acoustic behavior exhibited by these group-living animals, we conducted our response analysis over varying temporal windows (10 min – 5 s) to describe both longer-term and instantaneous changes in sound production. We found that common dolphins exhibited acute and pronounced changes in whistle rate in the 5 s following exposure to simulated Navy MFAS. This response was sustained throughout sequential MFAS exposures within experiments simulating operational conditions, suggesting that dolphins may not habituate to this disturbance. These results indicate that common dolphins exhibit brief yet clearly detectable acoustic responses to MFAS. They also highlight how variable temporal analysis windows – tuned to key aspects of baseline vocal behavior as well as experimental parameters related to MFAS exposure – enable the detection of behavioral responses. We suggest future work with oceanic delphinids explore baseline vocal rates a-priori and use information on the rate of change in vocal behavior to inform the analysis time window over which behavioral responses are measured.</p> |
| <b>Order of Authors:</b>      | Caroline Casey<br>Selene Fregosi<br>Julie Oswald<br>Vincent Janik<br>Fleur Visser<br>Brandon Southall                                                                                                                                                                                                                                                                                                                                                                                                                                                                                                                                                                                                                                                                                                                                                                                                                                                                                                                                                                                                                                                                                                                                                                                                                                                                                                                                                                                                                                                                                                                                                                                                                                                                                                                                                                                                                                                                                                                    |
| <b>Response to Reviewers:</b> | <p>Dear Vitor Hugo Rodrigues Paiva and the editorial team,</p> <p>We greatly appreciate your response to our submitted manuscript (Common dolphin whistle response to experimental mid-frequency sonar – PONE-D-23-38783). It was helpful and gratifying to receive reviewer comments on our study that were so thoughtful and meticulous. We appreciate that the editorial team believes that this is a unique paper that should be of broad interest to the readers of PLOS One.</p> <p>We have spent considerable time reflecting on and revising this manuscript based on the detailed recommendations of each reviewer. These changes can be seen in the “Revised Manuscript with Track Changes” document.</p> <p>With respect to the specific Journal Requirements, we have made the following</p>                                                                                                                                                                                                                                                                                                                                                                                                                                                                                                                                                                                                                                                                                                                                                                                                                                                                                                                                                                                                                                                                                                                                                                                                                 |

requested changes:

1. Please ensure that your manuscript meets PLOS ONE's style requirements, including those for file naming. The PLOS ONE style templates can be found at [https://journals.plos.org/plosone/s/file?id=wjVg/PLOOne\\_formatting\\_sample\\_main\\_body.pdf](https://journals.plos.org/plosone/s/file?id=wjVg/PLOOne_formatting_sample_main_body.pdf) and

[https://journals.plos.org/plosone/s/file?id=ba62/PLOOne\\_formatting\\_sample\\_title\\_authors\\_affiliations.pdf](https://journals.plos.org/plosone/s/file?id=ba62/PLOOne_formatting_sample_title_authors_affiliations.pdf)

The Title, Author, and affiliations have been updated. Additionally, we have carefully gone through PLOS ONE's style requirements, and have made several changes to the manuscript.

2. Thank you for stating the following financial disclosure:

"Funding for this project was provided by the U.S. Navy's Office of Naval Research (Award Numbers N000141713132, N0001418IP-00021, N000141712887, N000141912572). "

Please state what role the funders took in the study. If the funders had no role, please state: ""The funders had no role in study design, data collection and analysis, decision to publish, or preparation of the manuscript.""

If this statement is not correct you must amend it as needed.

Please include this amended Role of Funder statement in your cover letter; we will change the online submission form on your behalf.

This statement is correct. The funders had no role in study design, data collection and analysis, decision to publish, or preparation of the manuscript. We have removed the funding information from the Acknowledgements section and can re-include this in our cover letter.

3. Thank you for stating the following in the Acknowledgments Section of your manuscript:

"Funding for this project was provided by the U.S. Navy's Office of Naval Research (Award Numbers N000141713132, N0001418IP-00021, N000141712887, N000141912572). "

We note that you have provided funding information that is not currently declared in your Funding Statement. However, funding information should not appear in the Acknowledgments section or other areas of your manuscript. We will only publish funding information present in the Funding Statement section of the online submission form.

Please remove any funding-related text from the manuscript and let us know how you would like to update your Funding Statement. Currently, your Funding Statement reads as follows:

"Funding for this project was provided by the U.S. Navy's Office of Naval Research (Award Numbers N000141713132, N0001418IP-00021, N000141712887, N000141912572). "

Please include your amended statements within your cover letter; we will change the online submission form on your behalf.

We apologize for the confusion. We have removed the funding statement from the main body of the manuscript. The funding statement that you have here is correct.

4. We note that Figure 1 in your submission contain [map/satellite] images which may be copyrighted. All PLOS content is published under the Creative Commons Attribution License (CC BY 4.0), which means that the manuscript, images, and Supporting Information files will be freely available online, and any third party is permitted to access, download, copy, distribute, and use these materials in any way, even commercially, with proper attribution. For these reasons, we cannot publish previously copyrighted maps or satellite images created using proprietary data, such as Google software (Google Maps, Street View, and Earth). For more information, see our copyright guidelines: <http://journals.plos.org/plosone/s/licenses-and-copyright>.

We require you to either (1) present written permission from the copyright holder to publish these figures specifically under the CC BY 4.0 license, or (2) remove the figures from your submission:

a. You may seek permission from the original copyright holder of Figure 1 to publish the content specifically under the CC BY 4.0 license.

We recommend that you contact the original copyright holder with the Content Permission Form (<http://journals.plos.org/plosone/s/file?id=7c09/content-permission-form.pdf>) and the following text:

"I request permission for the open-access journal PLOS ONE to publish XXX under the Creative Commons Attribution License (CCAL) CC BY 4.0 (<http://creativecommons.org/licenses/by/4.0/>). Please be aware that this license allows unrestricted use and distribution, even commercially, by third parties. Please reply and provide explicit written permission to publish XXX under a CC BY license and complete the attached form."

Please upload the completed Content Permission Form or other proof of granted permissions as an "Other" file with your submission.

In the figure caption of the copyrighted figure, please include the following text: "Reprinted from [ref] under a CC BY license, with permission from [name of publisher], original copyright [original copyright year]."

b. If you are unable to obtain permission from the original copyright holder to publish these figures under the CC BY 4.0 license or if the copyright holder's requirements are incompatible with the CC BY 4.0 license, please either i) remove the figure or ii) supply a replacement figure that complies with the CC BY 4.0 license. Please check copyright information on all replacement figures and update the figure caption with source information. If applicable, please specify in the figure caption text when a figure is similar but not identical to the original image and is therefore for illustrative purposes only.

The following resources for replacing copyrighted map figures may be helpful:

USGS National Map Viewer (public domain): <http://viewer.nationalmap.gov/viewer/>

The Gateway to Astronaut Photography of Earth (public domain):

<http://eol.jsc.nasa.gov/sseop/clickmap/>

Maps at the CIA (public domain): <https://www.cia.gov/library/publications/the-world-factbook/index.html> and <https://www.cia.gov/library/publications/cia-maps-publications/index.html>

NASA Earth Observatory (public domain): <http://earthobservatory.nasa.gov/>

Landsat: <http://landsat.visibleearth.nasa.gov/>

USGS EROS (Earth Resources Observatory and Science (EROS) Center) (public domain): <http://eros.usgs.gov/#>

Natural Earth (public domain): <http://www.naturearthdata.com/>

We have redesigned the figure based on the map provided by NASA Earth Observatory (public domain) that complies with the CC BY 4.0 license. The updated Figure 1. is now reflected in the manuscript. We have also added the following to the figure caption. "The map was inspired by images obtained from the NASA Earth Observatory (public domain), is not drawn to scale, and is for illustrative purposes only".

5. Please include captions for your Supporting Information files at the end of your manuscript, and update any in-text citations to match accordingly. Please see our Supporting Information guidelines for more information:

<http://journals.plos.org/plosone/s/supporting-information>.

This has been done.

6. Please review your reference list to ensure that it is complete and correct. If you have cited papers that have been retracted, please include the rationale for doing so in the manuscript text, or remove these references and replace them with relevant current references. Any changes to the reference list should be mentioned in the rebuttal letter that accompanies your revised manuscript. If you need to cite a retracted article, indicate the article's retracted status in the References list and also include a citation and full reference for the retraction notice.

We have carefully gone through our references and have updated the formatting. We do not believe we have any retracted references in our reference list.

Additionally, all the reviewers made minor suggestions to strengthen the manuscript, and we have addressed each in turn. Our specific responses to reviewers are provided below. Given these changes, we hope that PLOS One finds our manuscript suitable for publication. Please do not hesitate to contact me if you require any additional information.

Specific comments to reviewers can be found below:

Reviewer #1: The information contained in the manuscript is useful. One has to wonder whether the results will stand if/when additional data are obtained and n is increased. We certainly aim to address this in the future in our ongoing BRS efforts and appreciate the supportive feedback.

The information itself is straightforward, but the manuscript is not as clear as it could be. There also were some inaccuracies, errors, inconsistencies, missing words, and formatting issues. The manuscript should be reviewed/revise editorially, since PLOS ONE does not use a copy editor.

Some of the issues included—

- Short- and long-beaked common dolphins are separate subspecies, not species. Their correct scientific names must be used.

Thank you for bringing this to our attention. This has been corrected throughout the manuscript based on the Marine Mammal Society Taxonomic list of marine mammal species subspecies.

- The units for source level and received level must be correct and complete (dB re 1  $\mu$ Pa at 1 m and dB re 1  $\mu$ Pa, respectively) and should include rms, when applicable. Thank you, this has been adjusted throughout the manuscript where appropriate.

- 10 MFAS CEEs were denoted in Table 1, but the text in the manuscript specified 9 CEEs in numerous instances.

We apologize for the confusion on this. We realize that there were some details here that needed to be resolved. Specifically, we had to exclude one of the CEEs (2021\_11) from our modeling work because of the low number of whistles detected during this experiment. The following information has been added to the text of the manuscript for clarity: “For the changepoint analysis, all 10 MFAS experiments were included. However, for the assessment of changes in whistle behaviors across different time scales, CEE 2021\_11 (conducted with long-beaked common dolphins) had to be excluded because the overall lack of detected whistles could not be successfully modeled. Consequently, the modeling results include nine controls and nine MFAS experiments.”

- The tense of nouns and verbs should be the same within a given sentence, as should the person.

- Commas should be used consistently and correctly throughout. In some instances, commas were not used when they should have been (i.e., after introductory clauses).

- Hyphens should not be used for nouns (i.e., ‘in 5 sec’ instead of ‘in 5-sec’) but should be used for adjectives (i.e., ‘in a 5-sec bin’ instead of ‘in a 5 sec bin’).

- Abbreviations should be used consistently (i.e., second, sec, and s were all used).

- “Table” should be capitalized when cited in the text.

- References should be cited in the correct order (numerically ascending), format (when the name also is used in the text), and with the correct punctuation (brackets [] instead of parentheses ()) for PLOS ONE).

- Capitalization for headings/headers and bolding of captions should be consistent.

- Extra spaces should be deleted within and between sentences.

We thank the reviewer for these detailed comments. We have carefully gone through the manuscript and have addressed each of their edits. These changes can be seen within the “Revised Manuscript with Track Changes” document.

Also, information regarding the IACUC review and approval was missing in various sections of the manuscript.

We apologize for this oversight. Our IACUC information has been added to the Acknowledgments section. The text now reads: “Additionally, all activities reported in this study were reviewed and approved by the Institutional Animal Care and Use Committee (IACUC Protocol No: CRC-2021-AUP-06, CRC-2021-AUP-08).”

Please see the pdfs for specific comments and questions regarding the manuscript and supplementary docs.

Many suggestions were made directly in an associated PDF (Reviewer #1). Those

changes (unless noted otherwise below) were made to the revised version of the manuscript and greatly improved the clarity. We thank Reviewer 1 for the time they spent reviewing our work.

-With respect to their comments about the consistency of the y-axis in Fig. 4b and Fig 4c, we decided to leave the figure as is, as the intention of the figure is to highlight the relative changes between the pre-exposure and exposure period for each individual plot, rather than compare across the plots. Keeping the axes as they are allows maximum resolution for across period comparisons.

-We will upload the data to NCEI as well since the project was funded by ONR.

-With respect to their comment about the validity of pooling the two subspecies acoustic data for baseline analysis, we decided not to pursue this approach since they regularly occur in mixed groups, and our sample size of *Delphinus delphis delphis* was relatively small. Further work looking at subspecies-specific differences in whistle production is still needed but is not within the scope of this paper.

Reviewer #2: Casey et al. aimed to measure the impact of Navy MFAS sonar on free-ranging dolphins in comparison to baseline variability data of acoustics. They utilize a network of acoustic buoys and controlled exposure experiments measure acoustic disturbance of free ranging short-beaked and long-beaked common dolphin whistles. CEEs were conducted off the coast of Santa Catalina Island and data were analyzed for vocal state changes. The authors found a significant vocal state change in the 5 seconds post CEEs. Interestingly, they give information on potential habituation of the animals as well.

Overall, it is a well written paper looking at vocal state changes as a tool for measuring disturbance. There are a few errors and areas that transition phrases are redundant. There are some areas where the authors have accidentally put in an extra space between words.

Thank you for this positive review of our manuscript. To address reviewers 1 and 2's comments, we have gone through the manuscript carefully to correct any editorial errors. We hope that this makes things easier to follow and clearer for the reader.

Line 19: Considering we do not have data that states that millions hear and are affected by Navy MFAS in particular, I would suggest rephrasing this first sentence or adding a citation.

We agree and have changed this sentence to be more general.

Line 222-223: While the author's state that the distance between the drone and the octocopter were estimated every thirty minutes, it would be beneficial for the authors to state how high the drone was flying on average.

Thank you for this suggestion. We have added the following details to the text to address both reviewer 2 and 3's point: "The animals' location was known from an associated octocopter drone flight (APO-42, Aerial Imaging Solutions) that utilized a micro 4/3 digital camera (Olympus E-PM2) and 25 mm lens (Olympus M. Zuiko F1.8) mounted to a gimbal. The octocopter flew at approximately 60 m directly above the dolphins to provide sufficient pixel resolution while also decreasing the potential for disturbance (see [34] for details)."

Line 427: Consider deleting "however" after Note.

We appreciate this suggestion and we have made this change.

Line 448: consider replacing en dash with an em dash.

We appreciate this suggestion and we have made this change.

Line 449: 10 MFAS CEEs were conducted but only 2 in *Dolphinus delphis*, why? I would suggest at least one line of explanation on this.

The reviewer here caught an important mistake in our text. While Table 1. reflected the correct proportion of CEEs for both sub-species (7 of 10 with *D. d. bairdii* and 3 of 10 with *D. d. delphis*), the text did not. The text is now consistent with the proportion of MFAS CEEs conducted with each sub-species presented in Table 1.

To address their question as to why we conducted more MFAS cees with *D. d. bairdii* – The total length of this project spanned over 4 years (2017, 2018, 2019, 2021). During that time, we did balance MFAS playbacks equally across subspecies. However, for this paper, we only decided to include data from 2019 and 2021 because of the consistency in acoustic methodology in the field during these two years. We happened to conduct more experiments with *D. d. bairdii* during the later years of this project,

which is why they are represented more here in this paper. We do not agree that we should include this in the text of the manuscript (as it is a bit verbose), so we have left it as is. We could add that *D. d. bairdii* was encountered more often and is therefore making up most of the data if the editors think this is helpful. Please advise.

Line 483: *cee* is not capitalized in this line but is in front of the word *type* in the line before. I would suggest making this congruent in the paragraph.  
This has been corrected in the manuscript.

Line 618: There is an extra space between the last word of the sentence and the period.  
This has been corrected in the manuscript.

Line 647: There is an extra space between the words "sizes" and "where".  
This has been corrected in the manuscript.

Reviewer #3: In this manuscript, the authors investigate the impact of mid-frequency active sonar (MFAS) on the whistle production of common dolphins in Southern California. The study uses a network of drifting acoustic buoys in a controlled exposure experiment to analyze the dolphins' acoustic reactions to sonar exposure over various time frames, to understand both longer-term and immediate changes in sound production.

The manuscript is detailed and informative but can be challenging to follow due to its complexity. Simplifying the language or reorganizing the data presentation could enhance readability. The authors do a good job arguing that the main objective is to clearly understand variability in baseline and examine differences in whistle count compared to baseline. However, some aspects are still unclear and could help the readability and better understanding of the scale.

We have taken into consideration this comment and have tried to make the manuscript clearer and more concise throughout. We hope that this satisfies reviewer 3's comment.

To better grasp the scope of the study, it would be helpful to know: How much total recording hours were collected? How much was actually used in the analysis? Up to 30 minutes of acoustic data per CEE was used in the baseline vocal activity (10-minute pre-exposure, 10-minute exposure, and 10-minute post-exposure periods) and 20 minutes of recordings per CEE was used in the response analysis (10-minute pre-exposure and 10-minute exposure periods).

Due to the nature of working with dynamic groups of free-ranging dolphins, the amount of additional recording before or after the actual CEE is highly variable (from just a few minutes before, to maybe 20 minutes or more after the CEE ended if it the animals moved a lot and the boat had to transit further back to pick up the buoy). Additionally, because of what we know about transmission loss, we used the 1600 m cut off considering a focal group within the range of the recordings; we may have had underwater recordings during the CEE time, or outside the nominal 30-minute CEE, but when the animals were 2+ km away those recordings were not considered usable. Because of this, we just analyzed up to the 30 minutes of the actual CEE, and only recordings from when the animals were within 1600 m of the recorder.

To address the suggestion for better grasping the scope, we added the following text to line 233-244:

"After accounting for this distance cut off, 9.25 total hours of recordings remained and were used in subsequent analysis."

Was the use of WMD validated with manually labeled data? AND

Although automated tools have gotten better, they still often bring a large amount of errors compared to manual labeling which is still recommended depending on the task. The validity of the results would be improved if the authors could use a subset of their data for manual analysis as a reliability measure of the software approach.

We appreciate these two comments and have combined our response here as they are closely related. We acknowledge that automated tools are imperfect and ideally would benefit from systematic manual review and validation. Our initial approach for this project did include manual review of all whistles, but we quickly realized this was not a feasible approach with the amount of data and very large numbers of whistles that we recorded. We had three analysts go through and count individual whistles from a very

small portion of these same recordings and found large variability in each analyst's manual assessment. The recordings often contain overlapping and/or 10s of whistles per second, which made accurate counts unreliable. While automated approaches have the same difficulties with overlapping whistles and periods of dense whistling, we opted to use an automated approach instead to remove some of the subjectiveness and biases introduced by different analyst. Our idea is that although an automated approach is imperfect, it is consistently imperfect within a 30-minute CEE, where recording conditions are similar. The text under the header "Quantifying whistle production and variability" aims to justify this approach within the text. To try to further clarify, we changed the term 'whistle counts' to 'whistle detections' throughout the body of the manuscript, and added the following to this section:

"A qualitative assessment of detector performance within each CEE ensured that variation in whistle detections accurately reflected variation in whistle activity observed in the spectrograms."

We qualitatively reviewed the WMD outputs to ensure we were getting valid results and that the observed counts reflected what we saw in the spectrograms. We observed that the WMD tends to fragment whistles that a human would likely consider one whistle, and its performance decreases as whistling increases. Any potential bias from this increased variance in performance with increased whistle counts is accounted for in the covariance matrix of the modeling, where we allowed variance to differ by overall whistle count. False positives were rare and occurred in the form of harmonics of the projected sonar signal or were from an unknown linear noise of some sort that occasionally occurred on one of the CEEs; we manually removed these false positives.

The abstract effectively summarizes a lot of information but could be enhanced by a clearer statement of the main findings beyond "exhibited an acute and dramatic change in acoustic behavior in the 5-seconds following exposure to experimental" Is the metrics only a count of whistle per overlapping windows?

We have reworded the abstract to make the findings of the study clearer.

L.157 - To what extent are the animals already accustomed to the signals. For how long? How many generations? What differences in dispersion, sample rate, etc, between actual MFAS pings and experimental conditions could affect the results?

Common dolphin habitat overlaps with the Southern California Range Complex, which is frequently used by the US Navy as the site of MFAS training exercises. Active sonar of some type, including the most powerful MFAS systems, is used in this area daily, often multiple times a day. How many years this has occurred is not information that is publicly available. The exact timing and repetition of sonar produced in this area is unknown, but presumably, these animals have been exposed to MFAS multiple times throughout their lives (lifespan ~ 30 years). The playback stimuli that we used are categorically very similar (with respect to timing – once every 25 seconds) to certain Navy sources (i.e., helo-dipping sonar). The source itself and the positioning of the source boat relative to the animals during our experiments were designed to mimic the received levels animals are likely exposed to during actual helo-dipping training exercises.

L.180 - Regarding the use of drones for the experiment, specific details such as the type of drones, their number, operational height, and potential disturbances (visual or sonic) at the water level would be valuable.

Thank you for this suggestion. We have added the following details to the text to address this point: "The animals' location was known from an associated octocopter drone flight (APO-42, Aerial Imaging Solutions) that utilized a micro 4/3 digital camera (Olympus E-PM2) and 25 mm lense (Olympus M. Zuiko F1.8) mounted to a gimbal. The octocopter flew at approximately 60 m directly above the dolphins to provide sufficient pixel resolution while also decreasing the potential for disturbance."

L.180-190 - Good methodology observation

Thank you.

L.227 - More clarification needed

We hope that the above text concerning the details of the octocopter is sufficient to address this point.

L.260 - Good methodological point

Thank you

L.270: Why use different recording hardware? Any baseline to address differences in recordings?

Different recording hardware was used because of cost/available resources over the course of this study. In the first years of this work, we had access to 2 SNAP recorders and 1 SoundTrap. In the time between the two field years, we were able to acquire two additional SoundTraps, which we found to be more reliable and easier to use in the field than the SNAPS. We qualitatively assessed the quality of the recordings (electronic noise, frequency response) and didn't observe any noticeable differences that we felt limited us from being able to use data from both recorder types. We standardized the Pamguard analysis approach to account for the differences in sample rate, and the detection threshold is based on SNR, so differences in system sensitivity are not an issue.

L.282: More clarification needed

Lines 281-208 of the original submitted manuscript read: "Whistles were exported from PAMGuard using the PAMGuard MATLAB tools

(<https://github.com/PAMGuard/PAMGuardMatlab>) and R package `PAMPal` (40).

MFAS harmonics were removed, and whistles were quantified at 1-second resolution."

We are unsure what more clarification is needed here, however we reworded and added a few additional words to try to improve clarity. It now reads "Detected whistles were automatically exported from the PAMGuard detection database using the PAMGuard MATLAB tools (<https://github.com/PAMGuard/PAMGuardMatlab>).

Annotated MFAS harmonics were removed using R package `PAMmisc` in R version 4.3.1 [33,34]. Whistles were quantified at 1-s resolution; because whistles are often longer than 1 s in duration, the total number of whistles starting within a 1-s bin was counted, providing a metric for whistle activity as whistles detections per second." We hope this is sufficient to address the reviewers needs.

Fig 1: It would be beneficial to add scale information to the figure.

This schematic is not drawn to scale. Instead, we attempted to highlight the configuration and experimental design used during playback experiments. Therefore, we have left out a scale bar from this figure and have added the sentence "This schematic is not drawn to scale" to the figure caption. (Lines 211-213).

L.577 - The lack of elevation in whistle count during the 1.6 s signal broadcast is intriguing. Further explanations on this observation and its implications would be insightful. Was the sonar frequency removed from the recorded audio? Extend on the possible use of full duplex vs single duplex for future experiments.

We certainly agree that the lack of whistles present during the 1.6s sonar signal is interesting, and we present some possible explanations in the discussion. For example, lines 572-581 read:

" The lack of whistle production during sonar transmission may be a tactic for reducing acoustic interference and masking, which has been shown to impact the detection, discrimination, and localization of relevant signals [41]. If the signal is predictable (as in our experiment), then animals should be able to adjust the timing of sound production to limit communication to periods in which noise is reduced [e.g., 41-44]. The ability of dolphins to learn the timing of intermittent noise has previously been demonstrated by Finneran et al., 2023 [41], who showed that individuals can modify their hearing sensitivity before the onset of predictably timed impulses, presumably to mitigate adverse auditory impacts."

Given that we didn't explicitly test this phenomenon, we have refrained from elaborating more on this topic.

We only detected whistles between 5-20 kHz, which excluded the frequency bands of the sonar signal itself. Further, we manually removed any harmonics from the sonar between 5-20 kHz that were detected incorrectly as whistles (this is already mentioned in the methods). We are a little unclear about the reviewer's question regarding "full



duplex versus single duplex for future experiments,” however I believe that we addressed this comment above.

L.590 - Interesting hypothesis, how could this be tested in the future?  
 We agree that this is an interesting point, although it would be difficult to test using the acoustic data alone. We have added the following sentence to expand upon this idea and how it is currently being explored by our research group: “In these cases, there are often a few key individuals that catalyze the collective behavior of the rest of the group. While it would be difficult to evaluate this process using acoustic data alone, concurrent video data collected from the associated drone flights is currently being evaluated to explore the spatial movement patterns of the group and identify those individuals that successfully initiate changes in group movement.”

L.607 - This point warrants earlier discussion in the manuscript for better context. Text  
 We did mention that the animals tested in this study occur in Navy operational areas in the methods section.

L.618 - Extra space before comma.  
 This has been resolved.

How do the two species compare in terms of vocal reactions?  
 Due to the relatively small sample size, differences in species response were not quantitatively tested. Anecdotally, one of the three MFAS experiments that were conducted with *D. d. delphis* showed a change in whistle production relative to baseline at the 5-second scale, and the remaining two experiments did not show a response. While interesting, this is inconclusive and deserves further investigation.

**Additional Information:**

| Question | Response |
|----------|----------|
|----------|----------|

|                                                                                                                                                                                                                                                                                                                                                                                                                                                                                                     |            |
|-----------------------------------------------------------------------------------------------------------------------------------------------------------------------------------------------------------------------------------------------------------------------------------------------------------------------------------------------------------------------------------------------------------------------------------------------------------------------------------------------------|------------|
| <p><b>Financial Disclosure</b></p> <p>Enter a financial disclosure statement that describes the sources of funding for the work included in this submission. Review the <a href="#">submission guidelines</a> for detailed requirements. View published research articles from <a href="#">PLOS ONE</a> for specific examples.</p> <p>This statement is required for submission and <b>will appear in the published article</b> if the submission is accepted. Please make sure it is accurate.</p> | <p>Yes</p> |
|-----------------------------------------------------------------------------------------------------------------------------------------------------------------------------------------------------------------------------------------------------------------------------------------------------------------------------------------------------------------------------------------------------------------------------------------------------------------------------------------------------|------------|

|                                                                                                                                                                                                                                                                                                                                                                                                                                                                                                                                                                                                                                                                                                                                                                                                                                                                                                                                                                                                                                                                                    |                                                                                                                                                                                                                                                                                                         |
|------------------------------------------------------------------------------------------------------------------------------------------------------------------------------------------------------------------------------------------------------------------------------------------------------------------------------------------------------------------------------------------------------------------------------------------------------------------------------------------------------------------------------------------------------------------------------------------------------------------------------------------------------------------------------------------------------------------------------------------------------------------------------------------------------------------------------------------------------------------------------------------------------------------------------------------------------------------------------------------------------------------------------------------------------------------------------------|---------------------------------------------------------------------------------------------------------------------------------------------------------------------------------------------------------------------------------------------------------------------------------------------------------|
| <p><b>Funded studies</b></p> <p>Enter a statement with the following details:</p> <ul style="list-style-type: none"> <li>• Initials of the authors who received each award</li> <li>• Grant numbers awarded to each author</li> <li>• The full name of each funder</li> <li>• URL of each funder website</li> <li>• Did the sponsors or funders play any role in the study design, data collection and analysis, decision to publish, or preparation of the manuscript?</li> </ul> <p>Did you receive funding for this work?</p>                                                                                                                                                                                                                                                                                                                                                                                                                                                                                                                                                   |                                                                                                                                                                                                                                                                                                         |
| <p>Please add funding details. as follow-up to "<b>Financial Disclosure</b></p> <p>Enter a financial disclosure statement that describes the sources of funding for the work included in this submission. Review the <a href="#">submission guidelines</a> for detailed requirements. View published research articles from <a href="#">PLOS ONE</a> for specific examples.</p> <p>This statement is required for submission and <b>will appear in the published article</b> if the submission is accepted. Please make sure it is accurate.</p> <p><b>Funded studies</b></p> <p>Enter a statement with the following details:</p> <ul style="list-style-type: none"> <li>• Initials of the authors who received each award</li> <li>• Grant numbers awarded to each author</li> <li>• The full name of each funder</li> <li>• URL of each funder website</li> <li>• Did the sponsors or funders play any role in the study design, data collection and analysis, decision to publish, or preparation of the manuscript?</li> </ul> <p>Did you receive funding for this work?"</p> | <p>Funding for this project was provided by the U.S. Navy's Office of Naval Research (Award Numbers N000141713132, N0001418IP-00021, N000141712887, N000141912572). . The funders had no role in study design, data collection and analysis, decision to publish, or preparation of the manuscript.</p> |
| <p>Please select the country of your main research funder (please select carefully as in some cases this is used in fee calculation).</p>                                                                                                                                                                                                                                                                                                                                                                                                                                                                                                                                                                                                                                                                                                                                                                                                                                                                                                                                          | <p>UNITED STATES - US</p>                                                                                                                                                                                                                                                                               |

as follow-up to "**Financial Disclosure**

Enter a financial disclosure statement that describes the sources of funding for the work included in this submission. Review the [submission guidelines](#) for detailed requirements. View published research articles from [PLOS ONE](#) for specific examples.

This statement is required for submission and **will appear in the published article** if the submission is accepted. Please make sure it is accurate.

#### Funded studies

Enter a statement with the following details:

- Initials of the authors who received each award
- Grant numbers awarded to each author
- The full name of each funder
- URL of each funder website
- Did the sponsors or funders play any role in the study design, data collection and analysis, decision to publish, or preparation of the manuscript?

Did you receive funding for this work?"

#### Competing Interests

Use the instructions below to enter a competing interest statement for this submission. On behalf of all authors, disclose any [competing interests](#) that could be perceived to bias this work—acknowledging all financial support and any other relevant financial or non-financial competing interests.

This statement is **required** for submission and **will appear in the published article** if the submission is accepted. Please make sure it is accurate and that any funding sources listed in your Funding Information later in the submission form are also declared in your Financial Disclosure statement.

The authors have declared that no competing interests exist.

View published research articles from [PLOS ONE](#) for specific examples.

#### **NO authors have competing interests**

Enter: *The authors have declared that no competing interests exist.*

#### **Authors with competing interests**

Enter competing interest details beginning with this statement:

*I have read the journal's policy and the authors of this manuscript have the following competing interests: [insert competing interests here]*

\* typeset

#### **Ethics Statement**

Enter an ethics statement for this submission. This statement is required if the study involved:

- Human participants
- Human specimens or tissue
- Vertebrate animals or cephalopods
- Vertebrate embryos or tissues
- Field research

Write "N/A" if the submission does not require an ethics statement.

General guidance is provided below. Consult the [submission guidelines](#) for detailed instructions. **Make sure that all information entered here is included in the Methods section of the manuscript.**

Animal observations, octocopter flights over dolphins, close approaches, and CEEs were conducted under NMFS permits 19116 and 19091. Additionally, all activities reported in this study were reviewed and approved by the Institutional Animal Care and Use Committee (IACUC Protocol No: CRC-2021-AUP-06, CRC-2021-AUP-08).

**Format for specific study types**

**Human Subject Research (involving human participants and/or tissue)**

- Give the name of the institutional review board or ethics committee that approved the study
- Include the approval number and/or a statement indicating approval of this research
- Indicate the form of consent obtained (written/oral) or the reason that consent was not obtained (e.g. the data were analyzed anonymously)

**Animal Research (involving vertebrate animals, embryos or tissues)**

- Provide the name of the Institutional Animal Care and Use Committee (IACUC) or other relevant ethics board that reviewed the study protocol, and indicate whether they approved this research or granted a formal waiver of ethical approval
- Include an approval number if one was obtained
- If the study involved *non-human primates*, add *additional details* about animal welfare and steps taken to ameliorate suffering
- If anesthesia, euthanasia, or any kind of animal sacrifice is part of the study, include briefly which substances and/or methods were applied

**Field Research**

Include the following details if this study involves the collection of plant, animal, or other materials from a natural setting:

- Field permit number
- Name of the institution or relevant body that granted permission

**Data Availability**

Authors are required to make all data underlying the findings described fully available, without restriction, and from the time of publication. PLOS allows rare exceptions to address legal and ethical concerns. See the [PLOS Data Policy](#) and [FAQ](#) for detailed information.

Yes - all data are fully available without restriction

A Data Availability Statement describing where the data can be found is required at submission. Your answers to this question constitute the Data Availability Statement and **will be published in the article**, if accepted.

**Important:** Stating 'data available on request from the author' is not sufficient. If your data are only available upon request, select 'No' for the first question and explain your exceptional situation in the text box.

Do the authors confirm that all data underlying the findings described in their manuscript are fully available without restriction?

**Describe where the data may be found in full sentences. If you are copying our sample text, replace any instances of XXX with the appropriate details.**

- If the data are **held or will be held in a public repository**, include URLs, accession numbers or DOIs. If this information will only be available after acceptance, indicate this by ticking the box below. For example: *All XXX files are available from the XXX database (accession number(s) XXX, XXX).*
- If the data are all contained **within the manuscript and/or Supporting Information files**, enter the following: *All relevant data are within the manuscript and its Supporting Information files.*
- If neither of these applies but you are able to provide **details of access elsewhere**, with or without limitations, please do so. For example:

*Data cannot be shared publicly because of [XXX]. Data are available from the XXX Institutional Data Access / Ethics Committee (contact via XXX) for researchers who meet the criteria for access to confidential data.*

*The data underlying the results presented in the study are available from (include the name of the third party*

All detected whistle counts obtained from PAMGuard from the closest buoy at 1-second resolution are available via Dryad data repository (accession number: <https://doi.org/10.5061/dryad.d2547d88r>)

|                                                                                                                                                                                                                                         |  |
|-----------------------------------------------------------------------------------------------------------------------------------------------------------------------------------------------------------------------------------------|--|
| <p><i>and contact information or URL).</i></p> <ul style="list-style-type: none"><li>• This text is appropriate if the data are owned by a third party and authors do not have permission to share the data.</li></ul> <p>* typeset</p> |  |
| Additional data availability information:                                                                                                                                                                                               |  |

1                   **Common dolphin whistle responses to experimental mid-frequency sonar**

2

3 Caroline Casey<sup>a,b,¶</sup>, Selene Fregosi<sup>a,¶</sup>, Julie N. Oswald<sup>c</sup>, Vincent M. Janik<sup>c</sup>, Fleur Visser<sup>d,e</sup>,

4 Brandon Southall<sup>a,b</sup>

5

6 <sup>a</sup>Southall Environmental Associates, Inc., Aptos, California, United States of America

7 <sup>b</sup>Institute of Marine Sciences, University of California Santa Cruz, Santa Cruz, California,

8 United States of America

9 <sup>c</sup>Sea Mammal Research Unit, Scottish Oceans Institute, School of Biology, University of St.

10 Andrews, St. Andrews, United Kingdom

11 <sup>d</sup>Kelp Marine Research, Hoorn, the Netherlands

12 <sup>e</sup>Department of Coastal Systems, Royal Netherlands Institute for Sea Research, Den Burg, Texel,

13 the Netherlands

14

15 \*Corresponding author

16 E-mail: [cbc Casey@ucsc.edu](mailto:cbc Casey@ucsc.edu)

17

18

19 <sup>¶</sup>CC and SF are Joint Senior Authors of this work.



## 20 **Abstract**

21 Oceanic delphinids **around naval operations** are regularly exposed to intense military  
22 sonar broadcast within the frequency range of their hearing. However, empirically measuring the  
23 impact of sonar on the behavior of highly social, free-ranging dolphins is challenging.  
24 Additionally, baseline variability or the frequency of vocal state-switching among social oceanic  
25 dolphins during undisturbed conditions is lacking, making it difficult to attribute changes in  
26 vocal behavior to anthropogenic disturbance. Using a network of drifting acoustic buoys in  
27 controlled exposure experiments, we investigated the effects of mid-frequency (3-4 kHz) active  
28 sonar (MFAS) on whistle production in short-beaked (*Delphinus delphis delphis*) and long-  
29 beaked common dolphins (*Delphinus delphis bairdii*) in southern California. Given the  
30 complexity of acoustic behavior exhibited by these group-living animals, we conducted our  
31 response analysis over varying temporal windows (10 min – 5 s) to describe both longer-term  
32 and instantaneous changes in sound production. We found that common dolphins exhibited acute  
33 and pronounced changes in whistle rate in the 5 s following exposure to simulated Navy MFAS.  
34 This response was sustained throughout sequential MFAS exposures within experiments  
35 simulating operational conditions, suggesting that dolphins may not habituate to this disturbance.  
36 These results indicate that common dolphins exhibit brief yet clearly detectable acoustic  
37 responses to MFAS. They also highlight how variable temporal analysis windows – tuned to key  
38 aspects of baseline vocal behavior as well as experimental parameters related to MFAS exposure  
39 – enable the detection of behavioral responses. We suggest future work with oceanic delphinids  
40 explore baseline vocal rates a-priori and use information on the rate of change in vocal behavior  
41 to inform the analysis time window over which behavioral responses are measured.

42

## 43 **Introduction**

44           Sound production and reception play a critical role in the lives of cetaceans, aiding in  
45 important life-history events, including maintenance of social relationships, coordination of  
46 group movement, foraging, and evasion of predators [1]. Consequently, substantial effort has  
47 been directed toward describing cetacean acoustic behavior [2,3] and evaluating how it is  
48 impacted by human-generated disturbance [4-8]. Many sources of anthropogenic noise pollution  
49 (*e.g.*, vessel noise, oil and gas exploration, renewable energy, coastal construction and  
50 maintenance, fisheries and aquaculture, and military activity) can have varying short and long-  
51 term impacts on marine mammal behavior and health [4,9-11]. Concentrated research efforts to  
52 characterize these impacts have led to the systematic development of acoustic exposure criteria,  
53 informing and improving effective management strategies for regulators and industries (for  
54 reviews on auditory criteria, see 12). Such assessments have also highlighted species and noise  
55 exposure contexts for which information is sparse or unavailable.

56  
57           Among cetaceans, oceanic delphinids represent an essential and logistically challenging  
58 group to evaluate the impact of anthropogenic noise on vocal behavior. These animals are highly  
59 soniferous, abundant, and often extremely gregarious (pods of > 500 individuals are common for  
60 some species). Sound production has been demonstrated to play a vital role in the maintenance of  
61 social relationships and cohesion among group members [2,3]. Oceanic delphinids are  
62 ubiquitous around some U.S. Navy operational areas where mid-frequency active sonar (MFAS;  
63 1-10 kHz) is commonly used for submarine detection in training exercises, resulting in  
64 associated large numbers of sonar exposures for these federally protected species. Some of the  
65 most powerful MFAS systems (*e.g.*, AN/SQS-53C) emit repeated pings with fundamental

66 frequencies in the 3-4 kHz range, ping lengths of approximately 1-3 s, and nominal source levels  
67 as high as 235 dB re 1  $\mu$ Pa at 1 m root-mean-square (RMS) that may be transmitted for several  
68 minutes to hours at high duty cycles (more than 1 ping/min) [13]. Aside from the elevated  
69 background noise and potential disturbance that may result from these training exercises [*e.g.*,  
70 14], MFAS signals overlap with the frequencies that oceanic dolphins commonly rely on for  
71 social sound (whistle) production. Delphinid whistles are narrowband tonal sounds with most  
72 acoustic energy concentrated below 20 kHz [15].

73

74         While MFAS has been linked to mass stranding events of cetaceans [13,16] and its effect  
75 on cetaceans has been experimentally evaluated in a handful of species (for a recent review, see  
76 [17]), the impact of sonar on the acoustic behavior of oceanic delphinids have not been  
77 systematically explored. This is mainly due to the logistical challenges of applying previously  
78 developed methods used in other behavioral response studies of individual animals to large  
79 aggregations of dolphins. Much of the prior research on cetacean behavioral responses to noise  
80 has capitalized on using suction-cup-attached motion-sensing and acoustic recording tags to  
81 characterize responses following controlled exposure to MFAS [*e.g.*, 18-20]. Unfortunately, such  
82 tags are challenging to deploy and are easily shed by small dolphins due to the tag size relative to  
83 the smaller body surface, high drag due to fast swimming speeds, and frequent physical social  
84 contact. Additionally, oceanic delphinids commonly occur in large groups that display  
85 remarkable coordination, making the collective vocal behavior of the group perhaps a more  
86 appropriate focus of analysis [21]. Opportunistic passive acoustic studies relying on large, cabled  
87 hydrophone arrays have been used to quantify changes in vocal activity and thus act as a proxy  
88 for the presence or absence of multiple animals before, during, and after exposure to MFAS

89 [22,23). Such experiments are valuable but require extensive, high-cost moored hydrophone  
90 arrays with restricted spatial coverage.

91  
92 Previous studies on acoustic responses of oceanic dolphins to Navy sonar have observed  
93 ~~shifting specific frequency~~ components of whistle contours, increasing or decreasing calling rate,  
94 increasing call amplitude, and even mimicry of MFAS elements [14, 23-25]. For example,  
95 tagged killer whales (*Orcinus orca*) adjust the high-frequency component of their whistles during  
96 sonar exposure and increase the number and amplitude of their calls following each ping [24].  
97 False killer whales (*Pseudorca crassidens*) appear to increase their whistle rate and produce  
98 more MFAS-like whistles after exposure to simulated sonar [25].

99  
100 One opportunistic study provided initial insights into the behavioral responses of some  
101 social oceanic delphinids to MFAS. Bottlenose dolphins (*Tursiops truncatus*), common dolphins  
102 (*Delphinus sp.*), Pacific white-sided dolphins (*Lagenorhynchus obliquidens*), and Risso's  
103 dolphins (*Grampus griseus*) incidentally exposed to MFAS showed a cessation of vocalizations,  
104 an increase in the intensity of vocalizations, or a combination of both [14]. Of all delphinid  
105 species, common dolphins displayed the broadest range of responses, including changing their  
106 behavioral state or direction of travel when sonar stopped, increasing the intensity of  
107 vocalizations when sonar began, vocalizing very little or not at all during sonar exposure, or a  
108 combination of these observations [14]. These results are consistent with a more recent  
109 opportunistic evaluation of delphinid responses to an underwater detonation, which showed that  
110 whistle rate, complexity, and frequency content varied in response to the explosive event [26].  
111 Depending upon the frequency, intensity, and consistency of these noise exposures, such

112 behavioral changes could result in physiological consequences that impact overall population  
113 health [27]. Unfortunately, information on baseline variability and the frequency of vocal state-  
114 switching during undisturbed conditions is lacking among free-ranging, social, oceanic  
115 delphinids, making it challenging to interpret the responses observed. While opportunistic  
116 studies of delphinid acoustic responses to sonar are insightful, a detailed assessment under  
117 controlled experimental conditions is needed to understand the extent to which MFAS impacts  
118 oceanic delphinids.

119

120         Quantifying vocal behavior in these taxa is complicated by the fact that dolphin acoustic  
121 behavior is dynamic, variable, and influenced by a myriad of social and environmental factors  
122 [28]. Acoustic behavior and how it changes in response to disturbance must be measured across  
123 some predetermined time interval. In previous cetacean behavioral response studies using a  
124 conventional controlled exposure experimental (CEE) design, this temporal window was often  
125 dictated by logistical limitations of the technology being used (*e.g.*, battery power of tags, the  
126 feasibility of continuous behavioral observations, etc.), or designed to match the duration of  
127 anthropogenic noise source being evaluated. However, averaging vocal behavior over long time  
128 windows may result in missing instantaneous or shorter duration responses at the onset of  
129 exposure or at scales more biologically meaningful to the individuals exposed. One way to  
130 address this is to examine acoustic metrics computed over various time windows to determine if  
131 and when we can attribute a change in vocal behavior to a known, controlled disturbance.

132

133         For this study, different broad and fine-scale analytical approaches were used to investigate  
134 the effects of experimental MFAS on whistle production in short-beaked (*Delphinus delphis*

135 *delphis*) and long-beaked common dolphins (*Delphinus delphis bairdii*) in southern  
136 California. By assessing group-level vocal behavior across different time scales, we aimed to:

- 137 1. Describe the variability in baseline vocal behavior of common dolphin aggregations  
138 during control conditions.
- 139 2. Compare vocal responses detected during a controlled exposure to MFAS across broad  
140 and fine temporal scales.

141 Given the need to establish sampling regimes that can be applied and compared across studies,  
142 our objective is to provide an informative framework for assessing the complex acoustic  
143 behavior exhibited by group-living species. We highlight how using different-sized temporal  
144 windows – tuned to key aspects of baseline vocal behavior as well as experimental parameters  
145 related to MFAS exposure – impacts the detection of behavioral responses.

146

## 147 **Materials and methods**

148 CEEs were conducted with two subspecies of common dolphins. This study was part of a  
149 broader effort to quantify group-level responsiveness of oceanic delphinids to military sonar  
150 using CEEs around Santa Catalina Island, located off the coast of southern California, USA.

151 Since they regularly occur in mixed groups, we pooled data for the two subspecies to describe  
152 baseline vocal data and included subspecies as a potential explanatory variable in our models.

153 The project integrated multiple data streams, including shore-based tracking of dolphin pods,  
154 passive acoustics to record vocal activity, and photogrammetry to measure fine-scale behavior  
155 [29]. This work was conducted between 2017-2021. We chose our study area because it lies near  
156 the Southern California Offshore Range (SCORE) – a tactical training area for the U.S. Navy

157 Pacific Fleet located off the west side of San Clemente Island – where animals regularly  
158 encounter the types of signals we used in our experiment.

159  
160 CEEs comprised three discrete phases: pre-exposure (baseline), exposure using  
161 intermittent simulated MFAS signals, and post-exposure. In control trials, the equipment was  
162 lowered into the water from the exposure boat, but no MFAS signals were broadcast. For details  
163 about the experimental source and sound source characteristics – including calculations of  
164 received levels – see Durban et al. 2022 [29]. Each experimental phase was 10 min in duration.  
165 During exposure phases, MFAS ‘pings’ of 1.6 s in duration consisting of three tonal and  
166 frequency-modulated elements between 3.5-4 kHz were transmitted. Pings were emitted at a  
167 broadband source level of 212 dB re  $1\mu\text{Pa}$  RMS every 25 s, which is similar in repetition rate,  
168 duty cycle, and the absence of a ramped-up source level (as used in some previous MFAS CEEs)  
169 to certain active Navy MFAS systems (*e.g.*, helicopter-dipped sonar systems). Up to 24 total  
170 pings were emitted per 10-min exposure phase, provided no permit-mandated shutdowns were  
171 implemented for animals within 200 m of the active sound source (this happened in only one  
172 CEE). The sound source was positioned relative to focal animal groups using sound propagation  
173 modeling to ensure received levels at focal animals were no greater than 140-160 dB re  $1\mu\text{Pa}$   
174 RMS.

175  
176 For every CEE, subspecies identity (based on differences in genetics, morphology, and  
177 pigmentation) was determined using aerial images obtained from drone footage, genetic  
178 sequencing from biopsy samples, and visual observation. Additionally, group size was  
179 characterized by experienced shore-based observers using binoculars or a binocular scope

180 located at elevated locations (~70 m), enabling a broad overview of the research area (up to 20  
181 km from shore). Shore-based tracking of animals could be conducted for groups up to 7 km from  
182 shore. Focal follows included estimating low, best, and high group size, the number of subgroups  
183 (defined as all individuals closer to each other than other individuals in the area), the range of  
184 inter-individual spacings within subgroups, and distances between subgroups. These  
185 observations were taken continuously throughout the experiment at 2-min intervals. For a  
186 complete description of these methods, see [29,30]

187

## 188 **Acoustic data collection and processing**

### 189 **Passive acoustic monitoring**

190         Passive acoustic recordings were obtained from each target group of dolphins using three  
191 drifting, remote-deployed acoustic recording units. Up to three separate recording units were  
192 tactically positioned and recovered from a single small (~6 m) rigid-hull inflatable boat, with the  
193 objective of placing one recording unit within 500 m of the predicted trajectory of the dolphins  
194 during each CEE phase (Fig 1). Each recording unit consisted of a surface buoy and flag with an  
195 underwater recorder. The recorder was either a SoundTrap ST300 (Ocean Instruments NZ,  
196 Auckland, New Zealand) or a SNAP Recorder (Loggerhead Instruments, Sarasota, FL, USA).  
197 Both recorded via a single omnidirectional calibrated hydrophone (SoundTrap: integrated  
198 hydrophone, frequency response 0.02–60 kHz  $\pm$  3 dB re 1  $\mu$ Pa, end-to-end sensitivity -178 dB re  
199 1  $\mu$ Pa/V; SNAP: HTI-96-MIN hydrophone, frequency response 1.0-20 kHz  $\pm$  3 dB re 1  $\mu$ Pa, end-  
200 to-end sensitivity -164 dB re 1  $\mu$ Pa/V,) which was suspended by a shock-mounted cable at a  
201 depth of 10 m. All recording units had a Global Positional System (GPS) tracking device (Trace,  
202 SPOT LLC, Chantilly, VA, USA) that recorded the location of the instrument once every min



203 (Fig 1). Five-min WAV files were continuously recorded at a 96 kHz sampling rate with a 16-bit  
204 resolution (SoundTrap) or a 44.1 kHz sampling rate with a 16-bit resolution (SNAP).

205

206 **Fig 1. A schematic representation of the placement of acoustic recorders (see inset for**  
207 **floating acoustic recording unit) relative to the track of the focal group of dolphins.** A single  
208 buoy and associated hydrophone were placed within 500 m of the animals during the pre-  
209 exposure, exposure, and post-exposure period. The sound source is approximately 1 km from the  
210 dolphins at the onset of the exposure period. Note that the source vessel was idling in neutral and  
211 was not moving throughout the duration of the exposure period. The dashed line with associated  
212 arrows represents the movement path of the focal group. The shore station monitoring the group  
213 was positioned on land and is denoted by the theodolite symbol. The map was inspired by  
214 images from the NASA Earth Observatory (public domain) and was not drawn to scale (for  
215 illustrative purposes only).

216

217         Given the dolphins' frequently unpredictable course, the relative proximity of each  
218 hydrophone to the animals was determined post-hoc to evaluate which PAM recording unit was  
219 closest to the focal group. The animals' location was known from an associated octocopter drone  
220 flight (APO-42, Aerial Imaging Solutions) that utilized a micro 4/3 digital camera (Olympus E-  
221 PM2) and 25 mm lens (Olympus M. Zuiko F1.8) mounted to a gimbal. The octocopter flew at  
222 approximately 60 m directly above the dolphins to provide sufficient pixel resolution while  
223 decreasing the potential for disturbance [see 29 for details]. The relative distances (in meters)  
224 between the focal group (from the drone's GPS) and each recorder (from their flag-mounted GPS  
225 units) were estimated for every min of the 30-min experiment using the Haversine formula and

226 linear interpolation in a custom MATLAB script (Mathworks, Natick, MA, USA, Fig 2).  
227 Recordings from the buoy closest to the focal group ~~at 1-min intervals~~ were used for all  
228 subsequent analyses. Any recordings made when a recorder exceeded 1.6 km from the focal  
229 group (even if the recorder was the closest available) were excluded. This threshold was selected  
230 based on a previous assessment of detection ranges of playbacks of odontocete whistles (10-20  
231 kHz) by bottom-mounted hydrophones in southern California, which demonstrated a 95%  
232 probability of detection of a 135 dB re 1  $\mu$ Pa dolphin whistle at 1.6 km with an SNR of 2.2 dB re  
233 1 $\mu$ Pa [31]. This assessment was supported by the drop-off in whistle amplitude observed in the  
234 spectrograms (*post-hoc*) when any buoy surpassed 1.6-1.8 km distance from the focal group (Fig  
235 2). After accounting for this distance cut-off, 9.25 total hours of recordings remained and were  
236 used in subsequent analysis.

237

238 **Fig 2. Spectrograms of each of the three recorders strategically placed on the track line of a**  
239 **moving group of dolphins and associated whistle detections from the buoy closest to the**  
240 **animals at each minute.** The solid white line represents the distance between the recorder and  
241 the drone centered over the focal group (units on the right y-axis), the red dashed vertical lines  
242 denote the experimental period, and the horizontal white dashed line marks the ~~1.6 km~~ threshold.  
243 Estimates of the relative distance between the focal group and each recorder were assessed every  
244 min of the 30-min experiment. The bottom panel shows the number of whistles detected on the  
245 closest recorder using the PAMGuard Whistle and Moan Detector. The blue dashed lines and  
246 associated blue numbers indicate times when the closest buoy switched, and which buoy was  
247 closest. The grey area denotes where whistle detections were excluded due to the recorder  
248 distance exceeding 1.6 km.

249

## 250 **Quantifying whistle production and variability**

251           While common dolphins are known to emit buzzes, echolocation clicks, and whistles, we  
252 focused our efforts on characterizing whistle production since they are the critical signal for  
253 long-distance communication and play a significant role in group cohesion and coordination [2].  
254 Extraction of whole whistle contours in high background noise with overlapping whistles is  
255 exceptionally challenging and results in high rates of missed detections, irrespective of  
256 methodology. To create a dataset in which error rates were kept constant across different  
257 experimental phases, we used the Whistle and Moan Detector (WMD) module in PAMGuard (v  
258 2.01.05)[32]. The WMD deals with uncertainties by only detecting parts of whistles that clearly  
259 stand out above noise using standardized settings across extractions. It is important to note that  
260 this often leads to a fragmentation of whistles, with one whistle being split into several  
261 independent sections. Thus, whistle detections reported here are not comparable to ones obtained  
262 with whole whistle extraction in other studies. However, for our assessment of changes in vocal  
263 activity between different experimental phases, it was more important to keep error rates  
264 constant to allow for relative comparisons. A qualitative assessment of detector performance  
265 within each CEE ensured that variation in whistle detections accurately reflected variation in  
266 whistle activity observed in the spectrograms.

267

268           The WMD operates on the spectrogram output of the PAMGuard Fast Fourier Transform  
269 (FFT) Engine module. We optimized settings for the FFT Engine to provide comparable  
270 frequency and temporal resolution of the calculated spectrograms across the two recorders and  
271 sampling rates. For the SoundTrap recorders, which had a sampling rate of 96 kHz, the FFT

272 Engine module computed spectrograms with an FFT length of 1024, hop size of 512, and a Hann  
273 window. This resulted in a frequency resolution of 93.75 Hz and time resolution of 10.67 ms. For  
274 the SNAP recorders, which had a sampling rate of 44.1 kHz, spectrograms were calculated with  
275 a Hann window, FFT length 512, and hop size 256, resulting in a frequency resolution of 86.13  
276 Hz and time resolution of 11.61 ms. The WMD was set to detect whistles between 5 kHz and 20  
277 kHz to exclude detection of the tonal sounds from the simulated mid-frequency sonar source  
278 (below 5 kHz) and to standardize the upper detection limit across the two sampling rates and  
279 avoid any possible edge effects near the Nyquist frequency of the lower sampling rate. The  
280 detection threshold was set at 6.0 dB re 1 $\mu$ Pa. Full WMD settings are in the S1 Fig. While the  
281 fundamental sonar tonals were excluded by the 5 kHz high-pass cut-off for detections, the high  
282 source level of the simulated MFAS resulted in the presence of harmonics in some of the  
283 recordings. All harmonics were manually annotated in PAMGuard Viewer using the  
284 Spectrogram Annotation module for later removal.

285

286 Detected whistles were automatically exported from the PAMGuard detection database  
287 using PAMGuard MATLAB tools (<https://github.com/PAMGuard/PAMGuardMatlab>).  
288 Annotated MFAS harmonics were removed using R package `PAMmisc` in R version 4.3.1  
289 [33,34]. Whistles were quantified at 1-s resolution; because whistles were often longer than 1 s  
290 in duration, the total number of whistles starting within a 1-s bin was counted, providing a metric  
291 for whistle activity as whistles detections per second. For brevity, this is referred to as whistle  
292 count throughout the remainder of this manuscript.

293

## 294 **Characterization of baseline vocal behavior**

## 295 **Overall whistle count**

296 We calculated the mean and median whistle count per second for the entire 30-min  
297 experiment for each control CEE to assess common dolphin vocal behavior under control  
298 conditions. These data were evaluated with reference to group size estimates collected by  
299 experienced shore-based observers.

300

## 301 **Changepoint analysis**

302 We applied a changepoint analytical approach to the control CEE data collected for both  
303 common dolphin subspecies to describe the natural variability in vocal behavior during control  
304 conditions. Change point detection is used to pinpoint times when the probability distribution of  
305 a time series changes (*i.e.*, vocal state changes). The aim is to identify times when either the  
306 mean or variance deviates from the expected trends in the dataset and estimate the number and  
307 position of all changepoints. Effectively, this approach detects points in time when a significant  
308 change in whistle count occurs. First, a 5-s smoothing window was applied to the raw 1-s whistle  
309 count data. Then, changepoints in both mean whistle count and whistle count variance were  
310 detected using the ‘changepoint’ package in R version 2.2.4 [34-35]. The “BinSeg” (Binary  
311 Segmentation) algorithm was used. This provided the number and locations of all state changes  
312 in the mean and the variance of whistle count over the 30-min sampling period.

313

## 314 **Assessing the impact of disturbance on vocal behavior**

315 Using broad and fine-scale time windows, we employed a hierarchical approach to  
316 characterizing the types of vocal responses that might be detected during controlled exposure to  
317 MFAS (Fig 3). All statistical analyses were carried out using R version 4.3.1 [34].

318

319 **Fig 3. Flowchart of methods implemented to assess changes in common dolphin vocal**  
320 **behavior during controlled exposure to MFAS.** Methods include pre-processing of acoustic  
321 data and baseline vocal behavior analysis, as well as a hierarchical assessment of disturbance on  
322 vocal behavior at three temporal scales.

323

### 324 **Difference in changepoints by period across CEEs**

325 We conducted a changepoint analysis on all CEEs (both controls and MFAS) to evaluate  
326 whether common dolphins change the frequency of vocal state switching as a result of exposure  
327 to MFAS. We used the same general method described above but quantified the number of  
328 changepoints in the 10-min pre-exposure and 10-min exposure periods separately. Changepoints  
329 were detected for both the mean and variance of the whistle count data. The difference in the  
330 number of changepoints between the two periods was calculated, and an unpaired t-test was used  
331 to evaluate any significant differences between controls and MFAS experiments.

332

### 333 **Characterize the impact of MFAS exposure on whistle count: 10-min time** 334 **scale**

335 To identify potential broad-scale changes in whistle count in response to simulated MFAS  
336 exposure, we pooled and analyzed all CEEs (both controls and MFAS exposures) using a  
337 Generalized Linear Mixed Model (GLMM) approach, implemented using R package  
338 ``glmmTMB`` [36]. We modeled the absolute difference in median whistle count between the 10-  
339 min pre-exposure period and the 10-min exposure period (*periodDiff*) as a function of CEE type  
340 (*ceeType*; either control or MFAS), a random identity variable (*ceeNum*), dolphin subspecies

341 (*subSpecies*), the best estimate of total group size from the shore-based observers (*groupSize*),  
342 and the mean distance between the focal group and the closest buoy for the entire CEE  
343 (*buoyDistance*). Using the absolute value for difference in median whistle count enabled us to  
344 explore the magnitude of a potential response. We modeled the relationship using a negative  
345 binomial distribution, which fit the count-type data after the transformation. Our full model was:

346

$$347 \quad \text{periodDiff} \sim \text{ceeType} + \text{ceeNum} + \text{subSpecies} + \text{groupSize} + \text{buoyDist}$$

348

349 We used backward elimination,  $\Delta\text{AIC}$ , and analysis of variance (ANOVA) to select the best  
350 model.

351

### 352 **Characterize the impact of MFAS exposure on whistle count: 20-s time scale**

353 To characterize more instantaneous changes in whistle production in response to MFAS  
354 exposure, we compared dolphin whistle detections in the 20 s before and 20 s after each ping (n  
355 = 24 1-s pings per 10-min experimental period, ~25 s between each ping) for both MFAS  
356 experiments and controls. We selected this time window to capture sustained variation in  
357 whistling behavior within a single ping cycle without overlap between cycles. Differences  
358 between these two sequential time bins were calculated by subtracting the mean whistle count for  
359 the first bin from the mean whistle count of the second bin (Fig 4B). The first ping started at time  
360 0, the second at 25 s, and so on. Because no actual pings were present in the control experiments,  
361 we calculated the change in whistle count surrounding time points placed at the same time as  
362 when actual pings would have occurred during an MFAS CEE.

363

364 **Fig 4. Example plots of (A) raw whistle detections over time, (B) changes in whistle count**  
365 **between 20-s duration sequential bins, and (C) changes in whistle count between 5-s**  
366 **duration sequential bins for the pre-exposure, exposure, and post-exposure period within**  
367 **one CEE.** The dashed vertical red line indicates the onset of exposure, and the sequential gray  
368 dashed lines represent each ping within the exposure period. Post-exposure periods were not  
369 included in the modeling analysis but are presented here for reference. The grey shaded area  
370 denotes where whistle detections were excluded due to the recorder distance exceeding 1.6 km.

371  
372 Like the analysis at the 10-min time scale, we used a GLMM approach (using R package  
373 ``glmmTMB``) to identify potential significant differences immediately following pings  
374 (*pingChange*) in MFAS experiments compared to controls where no pings were present. In  
375 addition to the previous fixed effects included at the 10-min scale (*ceeType*, *ceeNum*, *subSpecies*,  
376 *buoyDis*, and *groupSize*), we also included median whistle count per second for the entire  
377 experimental period to account for the varied baseline whistling activity across CEEs  
378 (*medWhist*).

379  
380 
$$pingChange \sim ceeType + ceeNum + subSpecies + groupSize + buoyDist + medWhist$$

381  
382 Binned ping change data were generally normally distributed but were zero-inflated, so  
383 we used a Gaussian distribution for the primary model and additionally modeled the zero  
384 inflation as a function of median whistle count (*medWhist*). We used backward elimination,  
385  $\Delta AIC$ , and analysis of variance (ANOVA) to select the best model.

386



## 387 **Characterize the impact of MFAS exposure on whistle count: 5-s time scale**

388         We repeated the analysis conducted above but over a shorter 5-s time window to  
389 investigate potential instantaneous changes immediately following pings (Fig 4C).  
390 Like the above analysis, we used a GLMM approach to identify potential significant differences  
391 in whistle count changes in the 5 s following compared to the 5 s before each ping (*pingChange*)  
392 for MFAS experiments compared to controls. We used the same fixed effects implemented at the  
393 20-s scale (*ceeType*, *ceeNum*, [*subSpecies*, *buoyDis*, and *groupSize*, *medWhist*) but also included  
394 an autocorrelation structure to this analysis *AR(1)* to account for apparent temporal lag effects in  
395 exploratory plots.

396

397          $pingChange \sim ceeType + ceeNum + subSpecies + groupSize + buoyDist + medWhist + AR(1)$

398

399 Like the 20-s scale, binned ping change data were normally distributed and zero-inflated; a  
400 Gaussian distribution was used for the conditional model and zero-inflation was modeled as a  
401 function of median whistle count (*medWhist*). We used backward elimination,  $\Delta AIC$ , and  
402 ANOVA to select the final model.

403

## 404 **CEE-by-CEE analysis**

405         We assessed each playback individually at each time scale to better contextualize the  
406 severity and persistence of responses and whether dolphins increased or decreased their whistle  
407 behavior following sonar exposure. The methods and results for the CEE-by-CEE analysis can  
408 be found in the supplementary materials (S1 File).

409

## 410 **Results**

411

### 412 **Characterization of baseline vocal behavior**

#### 413 **Basic description**

414         This analysis includes nine control experiments, each conducted on separate days. Four  
415 control experiments were conducted with short-beaked common dolphins, and five were  
416 conducted with long-beaked common dolphins (Table 1). This resulted in 270 mins of baseline  
417 acoustic data for both subspecies (pooled). The average group size across subspecies was 190  
418 individuals (45-300 animals). The dispersion of animals varied considerably within and between  
419 control experiments, including small to large groups (55-300 individuals) in tight to loose  
420 organization, joint (in a single group with no subgroups), or spread out over several subgroups  
421 (range: 2-6) at tens to several hundreds of meters apart (range: 10-800 m).

422

423         Whistles were successfully detected across all control experimental deployments. Mean  
424 (SD) and Median (IQR) whistle count per second varied between control CEEs (Table 1). In our  
425 assessment of the control experiments, we found the total number of whistles varied between  
426 0.3-4.6 whistles/s. Note that the inherent uncertainty error in our group size assessment for large  
427 groups did not allow us to calculate accurate whistle rates/individual (see Table 1 for group size  
428 estimates and whistle detections).

429

430 **Table 1. Summary of each controlled exposure experiment, including controls (no sound**  
431 **emitted) and MFAS (playback of mid-frequency active sonar).**

| CEE ID  | Subspecies | Estimated group size | Type    | RL (max)           | RL (range)             | Median [IQR]<br>whistles per second | Changepoints<br>(mean, pre-exposure) | Changepoints<br>(mean, exposure) | Changepoints<br>(variance, pre-exposure) | Changepoints<br>(variance, exposure) |
|---------|------------|----------------------|---------|--------------------|------------------------|-------------------------------------|--------------------------------------|----------------------------------|------------------------------------------|--------------------------------------|
| 2019_01 | Db         | 260                  | MFAS    | 147 dB re 1µPa RMS | 140-147 dB re 1µPa RMS | 6.96 [6.39]                         | 26                                   | 39                               | 5                                        | 1                                    |
| 2019_02 | Dd         | 350                  | control | n/a                | n/a                    | 4.80 [5.19]                         | 37                                   | 29                               | 0                                        | 5                                    |
| 2019_04 | Db         | 200                  | control | n/a                | n/a                    | 0.25 [0.77]                         | 2                                    | 0                                | 4                                        | 2                                    |
| 2019_06 | Db         | 45                   | control | n/a                | n/a                    | 0.32 [1.38]                         | 5                                    | 0                                | 4                                        | 9                                    |
| 2019_07 | Db         | 300                  | MFAS    | 154 dB re 1µPa RMS | 150-154 dB re 1µPa RMS | 3.11 [3.81]                         | 36                                   | 20                               | 3                                        | 3                                    |
| 2019_08 | Db         | 250                  | MFAS    | 142 dB re 1µPa RMS | 131-142 dB re 1µPa RMS | 1.50 [3.91]                         | 30                                   | 12                               | 4                                        | 4                                    |
| 2019_09 | Dd         | 250                  | control | n/a                | n/a                    | 4.21 [5.38]                         | 46                                   | 44                               | 2                                        | 4                                    |
| 2019_10 | Dd         | 30                   | MFAS    | 149 dB re 1µPa RMS | 146-149 dB re 1µPa RMS | 0.091 [0.38]                        | 0                                    | 0                                | 3                                        | 7                                    |
| 2021_01 | Db         | 150                  | control | n/a                | n/a                    | 3.14 [4.47]                         | 3                                    | 51                               | 1                                        | 3                                    |
| 2021_02 | Db         | 200                  | control | n/a                | n/a                    | 4.68 [3.89]                         | 18                                   | 29                               | 0                                        | 4                                    |
| 2021_03 | Dd         | 150                  | control | n/a                | n/a                    | 0.99 [2.01]                         | 11                                   | 0                                | 2                                        | 0                                    |
| 2021_04 | Db         | 150                  | control | n/a                | n/a                    | 4.66 [4.20]                         | 27                                   | 37                               | 4                                        | 2                                    |
| 2021_05 | Dd         | 250                  | control | n/a                | n/a                    | 0.36 [1.87]                         | 0                                    | 5                                | 8                                        | 4                                    |
| 2021_08 | Db         | 30                   | MFAS    | 153 dB re 1µPa RMS | 145-153 dB re 1µPa RMS | 14.13 [7.85]                        | 50                                   | 49                               | 2                                        | 4                                    |
| 2021_09 | Db         | 200                  | MFAS    | 157 dB re 1µPa RMS | 152-157 dB re 1µPa RMS | 1.17 [2.17]                         | 3                                    | 6                                | 2                                        | 2                                    |
| 2021_10 | Db         | 300                  | MFAS    | 159 dB re 1µPa RMS | 150-159 dB re 1µPa RMS | 15.34 [9.16]                        | 42                                   | 61                               | 3                                        | 2                                    |
| 2021_11 | Db         | 10                   | MFAS    | 153 dB re 1µPa RMS | 150-153 dB re 1µPa RMS | 0.0029 [0.063]                      | 0                                    | 0                                | 0                                        | 6                                    |
| 2021_12 | Dd         | 150                  | MFAS    | 152 dB re 1µPa RMS | 149-152 dB re 1µPa RMS | 2.85 [3.07]                         | 7                                    | 24                               | 4                                        | 6                                    |
| 2021_13 | Dd         | 200                  | MFAS    | 147 dB re 1µPa RMS | 139-147 dB re 1µPa RMS | 2.21 [4.73]                         | 2                                    | 2                                | 9                                        | 4                                    |

433

434 CEE ID denotes the year and the CEE number. Subspecies abbreviations are Db for *D. d. bairdii*

435 and Dd for *D. d. delphis*, and the estimated group size is taken from shore observations.

436 Received sound levels (RLs) are reported by Durban et al. 2022 [29]. The median and

437 interquartile range (IQR, 25-75th percentiles) are given for the raw whistle detections per second

438 of the entire 30-min CEE. Changepoints were calculated for both the mean whistle count and the

439 variance in whistle count, separately for the pre-exposure and exposure periods. Note that

440 “exposures” in controls were quiet periods compared to sound exposure in MFAS trials.

441

## 442 Baseline Changepoint Analysis

443 The baseline changepoint analysis revealed that mean detected whistle counts over the  
444 30-min sampling periods changed once every min, and variance in detected whistle counts  
445 changed once every 3.5 min.

446

## 447 **Assessing the impact of disturbance on whistle behavior**

448 A total of 10 MFAS CEEs were conducted – seven of which included long-beaked  
449 common dolphins and three of which included short-beaked common dolphins. The calculated  
450 average received level across all experiments was 151 dB re 1 $\mu$ Pa RMS (range 142-159 dB re  
451 1 $\mu$ Pa RMS, Table 1). The average group size for MFAS CEEs was 173 individuals (range 10-  
452 300, Table 1). For the changepoint analysis, all 10 MFAS experiments were included. However,  
453 for the assessment of changes in whistle behavior across different time scales, CEE 2021\_11  
454 (conducted with long-beaked common dolphins) had to be excluded because the ~~overall lack~~ of  
455 detected whistles could not be successfully modeled. Consequently, the modeling results include  
456 nine controls and nine MFAS experiments.

457

## 458 **Number of changepoints in pre-exposure vs exposure**

459 Changepoint analysis was run for all control (9) and MFAS (10) experiments. The  
460 number of changepoints detected in both the mean and variance of whistle count during the pre-  
461 exposure and exposure periods is presented in Table 1 for both controls and MFAS experiments.  
462 There was no significant increase or decrease in the mean and variance of detected whistle  
463 counts following MFAS exposure when compared to the natural variance present during control  
464 conditions. The difference ( $\Delta$ ) in change points in variance of whistle detections between the pre-  
465 exposure and exposure period did not differ significantly between controls and MFAS CEEs

466 (controls: M = 3.1, SD = 1.4; MFAS: M = 2.5, SD = 2.3;  $t(17) = 0.69$ ,  $p = 0.5$ ). The same was  
 467 true when comparing the mean whistle count between both experimental types (controls: M =  
 468 11.3, SD = 14.2; MFAS, M = 8.7, SD = 8.5;  $t(17) = 0.5$ ,  $p = 0.63$ ).

469

## 470 **Impact of MFAS exposure on whistle count: 10-min time scale**

471 Whistle detections did not change between the pre-exposure and exposure period during  
 472 MFAS experiments at the 10-min time scale. The preferred model was the simplest model with  
 473 the absolute value of the change in median whistle count as a function of only CEE type (either  
 474 MFAS or control). There was no significant effect of CEE type on the change in median whistle  
 475 detections (negative binomial GLMM,  $n = 18$ ,  $p = 0.8$ ). The full model ( $\Delta AIC$  5.4) indicated that  
 476 no proposed predictor variables (CEE type, CEE number, subspecies, buoy distance, or group  
 477 size) had a significant effect on the change in median whistle count between the pre-exposure  
 478 and exposure periods for both MFAS and control CEEs (negative binomial GLMM,  $n = 19$ :  $P >$   
 479  $0.05$  for all variables, Table 2).

480

481 **Table 2. Overview of GLMMs used at three time scales – 10-mins, 20-s, and 5-s.**

| Conditional model                                                                 | Zero-inflation<br>model | Distribution | $\Delta AIC$ | Degrees of<br>freedom | Dispersion<br>( $\sigma^2$ ) |
|-----------------------------------------------------------------------------------|-------------------------|--------------|--------------|-----------------------|------------------------------|
| 10-min scale                                                                      |                         |              |              |                       |                              |
| $abs(periodDiff) \sim ceeType$                                                    | n/a                     | nbinom2      | 0            | 3                     | 5.44                         |
| $abs(periodDiff) \sim ceeType + (1   ceeNum)$                                     | n/a                     | nbinom2      | 2            | 4                     | 1.04                         |
| $abs(periodDiff) \sim ceeType + (1   ceeNum) + subSpecies + buoyDist + groupSize$ | n/a                     | nbinom2      | 5.4          | 7                     | 1.48                         |
| 20-s scale                                                                        |                         |              |              |                       |                              |
| $pingDiff \sim ceeType + medWhist$                                                | $\sim medWhist$         | gaussian     | 0            | 6                     | 7.1                          |
| $pingDiff \sim ceeType$                                                           | $\sim medWhist$         | gaussian     | 5.1          | 5                     | 7.23                         |
| $pingDiff \sim ceeType + subSpecies + groupSize + buoyDist + medWhist$            | $\sim medWhist$         | gaussian     | 5.3          | 9                     | 7.09                         |

|                                                                                                                 |                 |          |       |    |      |
|-----------------------------------------------------------------------------------------------------------------|-----------------|----------|-------|----|------|
| $pingDiff \sim ceeType + (1   ceeNum)$                                                                          | $\sim medWhist$ | gaussian | 7.1   | 6  | 7.23 |
| $pingDiff \sim ceeType$                                                                                         | none            | gaussian | 28.3  | 3  | 6.71 |
| 5-s scale                                                                                                       |                 |          |       |    |      |
| $pingDiff \sim ceeType + groupSize + medWhist + ar1(times + 0   ceeNum)$                                        | $\sim medWhist$ | gaussian | 0     | 9  | 10.1 |
| $pingDiff \sim ceeType + (1   ceeNum) + subSpecies + groupSize + buoyDist + medWhist + ar1(times + 0   ceeNum)$ | $\sim medWhist$ | gaussian | 2.6   | 12 | 10.1 |
| $pingDiff \sim ceeType + ar1(times + 0   ceeNum)$                                                               | $\sim medWhist$ | gaussian | 13.8  | 7  | 9.83 |
| $pingDiff \sim ceeType + (1   ceeNum) + ar1(times + 0   ceeNum)$                                                | $\sim medWhist$ | gaussian | 15.8  | 8  | 9.83 |
| $pingDiff \sim ceeType$                                                                                         | none            | gaussian | 207.8 | 3  | 10.9 |

482 Model formulas (conditional and zero-inflation if included) are listed for each time scale of  
 483 analysis, and within each time scale are given in ascending order of  $\Delta AIC$  relative to the best  
 484 model ( $\Delta AIC = 0$ ).

485

#### 486 **Characterize the impact of MFAS exposure on whistle count: 20-s time scale**

487 Whistle detections did not differ significantly over the 20-s time windows surrounding  
 488 each ping. The preferred model at the 20-s scale included only predictor variables for CEE type  
 489 and median whistle count (Table 2). The results of this model showed that CEE type did not have  
 490 a significant effect on changes in whistle count in the 20 s after each ping (GLMM, n=18, slope  
 491 = 0.47, SE = 0.27,  $P > 0.05$ , Table 2) but that the baseline median whistle count for that  
 492 experimental period was a significant predictor for the change in whistle count following a ping  
 493 or control treatment (GLMM, n = 19, slope = 0.76, SE = 0.028,  $p = 0.0075$ ).

494

#### 495 **Characterize the impact of MFAS exposure on whistle count: 5-s time scale**

496 The preferred model at the 5-s scale included the temporal autocorrelation structure and  
 497 three explanatory variables, CEE type, group size, and median whistle count, all of which had a  
 498 significant effect on the change in whistle count in the 5 s immediately following a ping

499 compared to the 5 s immediately before a ping. When accounting for all other variables, the  
500 magnitude of the change in whistle count in the 5 s following an actual MFAS ping was 1.4  
501 times greater than any change in whistle count following control treatments (GLMM, n=18,  
502 slope = 1.43, SE = 0.47, p = 0.002, Table 2). The results of the CEE-by-CEE analysis (S1 File)  
503 showed that in five of the nine MFAS experiments, detected whistle counts were elevated in the  
504 5 s after each ping for the entire 10-min exposure period (plots of all raw whistles are provided in  
505 S2 Fig). The effect was particularly pronounced (outside the 75<sup>th</sup> percentile; S3 Fig) in the first  
506 ping of six of the MFAS CEEs; whistle activity increased in the 5 s following the first MFAS  
507 ping up to 15 times the whistle count in the 5 s before the first ping (mean of all MFAS CEEs  
508 3.9, SD 5.2), compared to increases of only up to 1.4 times (mean 0.46, SD 0.88) at the start of  
509 control treatments (Fig 5, S3 Fig). Additionally, group size and median whistle count for the  
510 exposure period were significant predictor variables. Larger groups showed more extensive  
511 changes in whistle count following pings and control treatments (GLMM, n=18, slope = 0.007,  
512 SE = 0.003, p = 0.008, Table 2), and when the median background whistle count was higher, so  
513 too were the changes following pings and control treatments (GLMM, n=18, slope = 0.25, SE =  
514 0.048, p = < 0.005, Table 2).

515

516 **Fig 5. (A) Spectrogram example of 5 s before and 5 s after the first ping for MFAS CEE**

517 **2021\_08 illustrates the significant increase in whistle count immediately following the**

518 **cessation of the ping.** The focal group was comprised of approximately 30 long-beaked common

519 dolphins. The MFAS signal can be seen between 3 and 4 kHz. (B) Boxplot of the change in

520 whistle count from the 5 s before to the 5 s following each of the 24 pings for CEE 2021\_08.

521 Boxplot shows median, 25th, and 75th percentiles, with raw whistle count changes as open gray  
522 circles. The change following the first ping is shown as a red star.

523

## 524 **Discussion**

525 Multiple factors – including rapid changes in behavioral state throughout the experiment and  
526 variation in group size and composition – make it difficult to assess whether changes in vocal  
527 behavior are due to disturbance or natural variability. We assessed vocal behavior during control  
528 conditions to understand typical acoustic variation among common dolphins. We found that  
529 dolphins exhibited natural vocal state changes (identified by the changepoint analysis) in whistle  
530 production approximately once every min. This rapid acoustic state switching informed our  
531 analytical approach, which utilized a range of temporal windows to test for changes in whistle  
532 count (5 s – 10 min) before and after MFAS exposure. Across the longer time windows selected;  
533 we did not detect a shift in whistle behavior attributable to MFAS. However, CEE type  
534 significantly affected the change in whistle count in the 5 s following a ping compared to the 5 s  
535 immediately before a ping.

536

537 The initial selection of the time period over which behavior was assessed in response to Navy  
538 sonar (10 min) for this project was influenced by multiple factors, including the flight endurance  
539 of the drone used for calculating animal distance to our recording buoys, our ability to  
540 consistently track large groups of fast-moving dolphins, and other previous BRS studies using  
541 MFAS (*e.g.*, 18, 37]. Many of the aforementioned constraints are imposed by the logistics of  
542 fieldwork. An informed approach to identifying behavioral responses to anthropogenic sources  
543 also requires prior knowledge of the timing of behavioral state switching in the study species.



544 For example, previous work with blue whales (*Balaenoptera musculus*) evaluated several  
545 behavioral metrics (*e.g.*, maximum depth, dive time, ascent/descent rate) in responses to  
546 simulated MFAS exposure over a 30-min time window [37]. This exposure duration (which  
547 included a 30-min pre-exposure period) was adequate to capture a behavioral change given the  
548 typical duration of their dive cycles (5-8 mins) [38]. In contrast, beaked whales exhibit incredibly  
549 long, deep foraging dives that often last over an hour, followed by long periods of recovery [*e.g.*,  
550 39,40). Consequently, studies focused on direct measurements of behavioral response by  
551 Cuvier's beaked whales to MFAS extended their pre-exposure baseline period up to 9.3 hours  
552 and evaluated their response to sonar for up to 1.7 hours after the exposure period [41].

553

554 While the 10-min exposure period seemed appropriate given the fast-paced lifestyle of  
555 common dolphins, neither the aggregate model nor the individual assessment of each CEE  
556 detected a change in acoustic behavior that could be ascribed to sonar exposure at this time scale.  
557 Even when we explored variation in whistle production during the 20-s surrounding each ping,  
558 the experimental period was not a significant predictor of changes in whistle count in either the  
559 MFAS or control experiments, as vocal state switching often occurs within a 40-s time window  
560 under baseline conditions. While the impacts of sonar may be evident over the 10-min exposure  
561 period for other behavioral metrics (*i.e.*, changes in behavioral state, group composition, diving  
562 behavior), our analysis reveals that changes in acoustic behavior are limited to an extremely  
563 narrow time window in these two subspecies.

564

565 It was only at the 5-s time scale surrounding each ping that we observed dolphins exhibiting  
566 an acute acoustic response, which included a rapid increase in whistle production relative to the 5

567 s immediately before sound exposure. On average, dolphins increased their whistle count four  
568 times the average in the 5 s preceding the first ping of the exposure. In one MFAS experiment,  
569 dolphins increased their whistle production 15 times compared to the whistle count in the 5 s  
570 immediately before the first ping (S3 Fig). This elevated vocal response following the first ping  
571 of the exposure was seen in six of the nine MFAS exposures where whistles were present.

572

573 Elevations in whistle detections did not occur during the sonar transmission itself – which  
574 lasted for 1.6 s. Rather, the increased vocal production occurred once the signal had been  
575 transmitted, often abating within ~ 10 s. The lack of whistle production during sonar  
576 transmission may be a tactic for reducing acoustic interference and masking, which has been  
577 shown to impact the detection, discrimination, and localization of relevant signals [42]. If the  
578 signal is predictable (as in our experiment), then animals should be able to adjust the timing of  
579 sound production to limit communication to periods in which noise is reduced [*e.g.*, 42-45]. The  
580 ability of dolphins to learn the timing of intermittent noise has previously been demonstrated by  
581 Finneran et al., 2023 [42], who showed that individuals can modify their hearing sensitivity  
582 before the onset of predictably timed impulses, presumably to mitigate adverse auditory impacts.  
583 Surprisingly, little is known about their capacity to alter the timing of vocal production in  
584 response to interfering signals under baseline conditions.

585

586 The sudden increase in vocal behavior following the first ping could be an example of the  
587 amplification of the behavior of group members through recruitment or reinforcement (*i.e.*,  
588 positive feedback) [46]. In this scenario, one dolphin may whistle in response to a surprising,  
589 salient stimuli, and others may follow suit. As this recruitment response continues, the number of

590 dolphins producing whistles will increase further, and information is spread rapidly throughout  
591 the group [47]. In such cases, a few key individuals could catalyze the collective behavior of the  
592 rest of the group. While it would be difficult to evaluate this process using acoustic data alone,  
593 concurrent video data collected from the associated drone flights is currently being assessed to  
594 explore the spatial movement patterns of the group and identify those individuals that  
595 successfully initiate changes in group movement. Alternatively, the rapid increase in vocal  
596 behavior following each ping could indicate that multiple animals exchange whistles to contact  
597 their closest social partners in the presence of an unknown stimulus. This could be expected  
598 given the role of whistles in group cohesion and coordination [2,48].

599

600 Surprisingly, in the playbacks when dolphins showed a significant increase in vocal behavior  
601 in the 5-sec following the first ping (6 of 9 CEEs, S3 Fig), the severity of their acoustic response  
602 did not abate over the course of the exposure (S2 Fig). This suggests that dolphins did not  
603 habituate to successive pings (*i.e.*, show a progressive decrease in the amplitude of a vocal  
604 behavioral response after repeated exposure). This observation is surprising given that the  
605 dolphins tested in this study likely live a large portion of their lives in areas regularly ensonified  
606 by Navy sonar. Continued work is needed to confirm these initial findings; for example, future  
607 studies could compare animals' responsiveness in the Southern California Bight to nearby  
608 populations in areas where Navy sonar is not regularly present (*e.g.*, Monterey Bay). Considering  
609 whether dolphins may be learning to modify their vocal behavior in response to repeated noise  
610 exposure may provide foundational evidence to support using vocal rates as a measure of  
611 sensitization or habituation to anthropogenic stimuli, as has been done in terrestrial species [as in  
612 49,50].

613

614 Future management decisions mitigating the impact of sonar on oceanic delphinids should  
615 consider our reported results of clear responses during CEEs when analyses were conducted at  
616 the appropriate temporal resolution. Concerning the most recent methodology for assessing the  
617 relative response severity for free-ranging marine mammals to acoustic disturbance [51] – had  
618 the acoustic response of animals to MFAS been pooled across the 10-min time window –  
619 common dolphins likely would have been assigned a behavioral response severity score of 0 (no  
620 response detected). However, when evaluating vocal behavior across a shorter time window,  
621 common dolphins would be elevated to a category three severity, which includes an increase in  
622 possible contact or alarm calls [51]. Ultimately, continued work with this (and other closely  
623 related) species should also consider how observed behavioral responses vary with respect to  
624 other contextual parameters, including behavioral state, group composition (*e.g.*, presence or  
625 absence of calves), seasonality, and environmental covariates. Concurrent efforts from this  
626 project aim to integrate passive acoustics with other remotely sensed datasets (*i.e.*, shore-based  
627 group tracking and aerial photogrammetry) to identify group-level behavioral changes and  
628 quantify exposure-response relationships [49]. Paired with energetic modeling methods [*e.g.*,  
629 27,53,54], these data can link ~~these~~ observed short-term behavioral responses to long-term  
630 fitness outcomes in this species and inform effective mitigation strategies.

631

632 Our study has some limitations that can be addressed in future work. Given the close  
633 phylogenetic relationship between short-beaked and long-beaked common dolphins [55,56], the  
634 basic description of baseline vocal behavior (*i.e.*, whistle count data) was combined across  
635 subspecies in our analysis. However, recent work by [Oswald et al.](#), discovered unique whistle

636 contours in short-beaked common dolphins suggesting that these distinctive acoustic signals  
637 could help facilitate recognition between these *Delphinus* subspecies [57]. An increase in sample  
638 size for both long-beaked and short-beaked common dolphins would provide a more detailed  
639 understanding of their baseline vocal behavior and enable the exploration of whether each  
640 subspecies shows a differential or similar response in whistle-type usage to MFAS. Additionally,  
641 photo identification of individuals within these large, ephemeral groups is challenging.  
642 Consequently, whether individual dolphins around Catalina Island were exposed more than once  
643 to the experimental treatment is unknown. Future research could direct efforts toward other  
644 oceanic delphinids with smaller group sizes where photo-identification is feasible and reliable  
645 (*e.g.*, bottlenose or rough-toothed dolphins).

646

647 In any behavioral experiment, the response of the individual or group that is tested should be  
648 measured and interpreted over a time window that is informed by their natural behavior. We  
649 suggest that future work with other oceanic delphinid species explore baseline vocal rates a-  
650 priori and use information on vocal state-switching to inform the analysis time window over  
651 which behavioral responses are measured. Given these animals' susceptibility to frequent MFAS  
652 exposure in Navy operational areas, evaluating how repeated exposure influences responses is of  
653 particular interest. Future work should continue to explore critical factors likely to affect the  
654 probability of response among these large groups, including their behavioral state and proximity  
655 to the sound source and received level at the onset of exposure.

656

## 657 **Acknowledgments**

658 Animal observations, octocopter flights over dolphins, close approaches, and CEEs were  
659 conducted under NMFS permits 19116 and 19091. Additionally, all activities reported in this  
660 study were reviewed and approved by the Institutional Animal Care and Use Committee  
661 (IACUC Protocol No: CRC-2021-AUP-06, CRC-2021-AUP-08). We thank the *M/V Magician*  
662 and Captain Carl Mayhugh for support in the field and the University of Southern California's  
663 Wrigley Institute for Environment and Sustainability for their hospitality throughout this  
664 project. This project would not have been possible without the dedicated contribution of all  
665 members of the Tagless-BRS team. Thank you to Stacy DeRuiter for extensive advice on  
666 statistical modeling and analysis. Additionally, we appreciate the thoughtful feedback provided  
667 by Ari Friedlaender, Colleen Reichmuth, Peter Cook, and John Durban during analysis and  
668 manuscript preparation. We also thank Ryan Jones, who created the line drawings for Fig 1.

669

## 670 **References**

- 671 1. Tyack PL. Acoustic communication under the sea. In: Hopp SL, Owren MJ, Evans CS,  
672 editors. *Animal acoustic communication*. Berlin / Heidelberg: Springer; 1998.
- 673 2. Janik VM. Acoustic communication in delphinids. *Adv Study Behav*. 2009;40: 123–157.
- 674 3. Lammers MO, Oswald JN. Analyzing the acoustic communication of dolphins. In: Herzing  
675 DL, Johnson CM, editors. *Dolphin communication and cognition: Past, present, and*  
676 *future*. Cambridge: MIT Press; 2015. pp. 107-130.
- 677 4. Erbe C, Dunlop R, Dolman S. Effects of noise on marine mammals. In: Slabbekoorn H,  
678 Dooling R, Popper A, Fay R, editors. *Effects of anthropogenic noise on animals*. New  
679 York: Springer; 2018.

- 680 5. Williams R, Wright AJ, Ashe E, Blight LK, Bruintjes R, Canessa R, et al. Impacts of  
681 anthropogenic noise on marine life: Publication patterns, new discoveries, and future  
682 directions in research and management. *Ocean Coast Manag.* 2015;115: 17–24.
- 683 6. Southall BL, Finneran JJ, Reichmuth C, Nachtigall PE, Ketten DR, Bowles AE, et al. Marine  
684 mammal noise exposure criteria: Updated scientific recommendations for residual hearing  
685 effects. *Aquat Mamm.* 2019;45(2): 125–232.
- 686 7. Hatch LT, Wahle CM, Gedamke J, Harrison J, Laws B, Moore SE, et al. Can you hear me  
687 here? Managing acoustic habitat in US waters. *Endanger Species Res.* 2016;30(1): 171–  
688 86.
- 689 8. Tyack PL, Janik VM. Effects of noise on acoustic signal production in marine mammals. In:  
690 Brumm H, editor. *Animal communication and noise.* New York: Springer; 2013. pp. 251-  
691 271.
- 692 9. Nowacek DP, Thorne LH, Johnston DW, Tyack PL. Responses of cetaceans to anthropogenic  
693 noise. *Mamm Rev.* 2007;37(2): 81–115.
- 694 10. Hastie G, Merchant ND, Götz T, Russell DJF, Thompson P, Janik VM. Effects of impulsive  
695 noise on marine mammals: Investigating range-dependent risk. *Ecol Appl.* 2019;29:  
696 e01906.
- 697 11. Harris CM, Sadykova D, DeRuiter SL, Tyack PL, Miller PJO, Kvadsheim PH, et al. Dose  
698 response severity functions for acoustic disturbance in cetaceans using recurrent event  
699 survival analysis. *Ecosphere.* 2015;6(11): 1–14.
- 700 12. Southall BL, Finneran JJ, Reichmuth C, Nachtigall PE, Ketten DR, Bowles AE, et al. Marine  
701 mammal noise exposure criteria: Updated scientific recommendations for residual hearing  
702 effects. *Aquat Mamm.* 2019;45(2): 125–232.

- 703 13. D'Amico A, Pittenger R. A brief history of active sonar. *Aquat Mamm*. 2009;35(4): 426–  
704 34.
- 705 14. Henderson EE, Smith MH, Gassmann M, Wiggins SM, Douglas AB, Hildebrand JA.  
706 Delphinid behavioral responses to incidental mid-frequency active sonar. *J Acoust Soc*  
707 *Am*. 2014;136(4): 2003–2014.
- 708 15. Oswald JN, Rankin S, Barlow J. The effect of recording and analysis bandwidth on acoustic  
709 identification of delphinid species. *J Acoust Soc Am*. 2004;116(5): 3178–3185.
- 710 16. Filadelfo R, Mintz J, Michlovich E, D'Amico A, Tyack PL, Ketten DR. Correlating military  
711 sonar use with beaked whale mass strandings: What do the historical data show? *Aquat*  
712 *Mamm*. 2009;35(4): 435–444.
- 713 17. Guan S, Brookens T. An overview of research efforts to understand the effects of underwater  
714 sound on cetaceans. Vol. 2, *Water Biol Secur*. 2023;2: 100141.
- 715 18. Southall BL, DeRuiter SL, Friedlaender A, Stimpert AK, Goldbogen JA, Hazen E, et al.  
716 Behavioral responses of individual blue whales (*Balaenoptera musculus*) to mid-  
717 frequency military sonar. *J Exp Biol*. 2019;222: 5.
- 718 19. Sivle LD, Kvadsheim PH, Fahlman A, Lam FPA, Tyack PL, Miller PJO, et al. Changes in  
719 dive behavior during naval sonar exposure in killer whales, long-finned pilot whales, and  
720 sperm whales. *Front Physiol*. 2012;11: 400
- 721 20. Deruiter SL, Boyd IL, Claridge DE, Clark CW, Gagnon C, Southall BL, et al. Delphinid  
722 whistle production and call matching during playback of simulated military sonar. *Mar*  
723 *Mamm Sci*. 2013;29(2): E46-E59.



- 724 21. Ioannou CC, Laskowski KL. A multi-scale review of the dynamics of collective behaviour:  
725 from rapid responses to ontogeny and evolution. *Philos Trans R Soc Lond, B*.  
726 2023;10(378): 20220059.
- 727 22. Durbach IN, Harris CM, Martin C, Helble TA, Henderson EE, Ierley G, et al. Changes in the  
728 movement and calling behavior of minke whales (*Balaenoptera acutorostrata*) in  
729 Response to Navy Training. *Front Mar Sci*. 2021;8: 660122.
- 730 23. Rendell LE, Gordon JCD. Vocal response of long-finned pilot whales (*Globicephala melas*)  
731 to military sonar in the Ligurian Sea. *Mar Mamm Sci*. 1999;15(1): 198–204.
- 732 24. Miller PJO, Antunes RN, Wensveen PJ, Samarra FIP, Catarina Alves A, Tyack PL, et al.  
733 Dose-response relationships for the onset of avoidance of sonar by free-ranging killer  
734 whales. *J Acoust Soc Am*. 2014;135(2): 975–93.
- 735 25. DeRuiter SL, Boyd IL, Claridge DE, Clark CW, Gagnon C, Southall BL, et al. Delphinid  
736 whistle production and call matching during playback of simulated military sonar. *Mar*  
737 *Mamm Sci*. 2013;2: 46-59.
- 738 26. Lara G, Bou-Cabo M, Llorens S, Miralles R, Espinosa V. Acoustical behavior of delphinid  
739 whistles in the presence of an underwater explosion event in the Mediterranean coastal  
740 waters of Spain. *J Mar Sci*. 2023;11(4): 780.
- 741 27. Keen KA, Beltran RS, Pirota E, Costa DP. Emerging themes in population consequences of  
742 disturbance models. *Proc R Soc B*. 2021;288(1957): 20210325.
- 743 28. King SL, Connor RC, Montgomery SH. Social and vocal complexity in bottlenose dolphins.  
744 *Trends Neurosci*. 2022; 45: 881-883.

- 745 29. Durban JW, Southall BL, Calambokidis J, Casey C, Fearnbach H, Joyce TW, et al.  
746 Integrating remote sensing methods during controlled exposure experiments to quantify  
747 group responses of dolphins to navy sonar. *Mar Pollut Bull.* 2022;174: 113194.
- 748 30. Visser, F. Moving in concert: Social and migratory behaviour of dolphins and whales in the  
749 North Atlantic Ocean. PhD dissertation, University of Amsterdam. 2014.
- 750 31. Hager CA. Assessment of the performance of the near-bottom hydrophones of the US Navy  
751 Southern California offshore range in detecting, localizing and reconstructing 10-20KHZ  
752 odontocete whistles. PhD dissertation, Naval Postgraduate School. 2008.
- 753 32. Gillespie D, Mellinger DK, Gordon J, McLaren D, Redmond P, McHugh R, et al.  
754 PAMGUARD: Semiautomated, open-source software for real- time acoustic detection  
755 and localization of cetaceans. *J Acoust Soc Am.* 2009;125(4): 2547–2547.
- 756 33. Sakai T, Barlow, J, Griffiths, E, Oswald, J, Schmidt, V. PAMmisc: Miscellaneous functions  
757 for passive acoustic analysis. 2023. <https://CRAN.R-project.org/package=PAMmisc>
- 758 34. R Core Team. R: A Language and Environment for Statistical Computing. R Foundation for  
759 Statistical Computing, Vienna, Austria. 2023. <https://www.R-project.org/>
- 760 35. Killick R, Eckley I. changepoint: An R package for changepoint analysis. *J Stat Softw.*  
761 2014;58(3): 1-9.
- 762 36. Brooks ME, Kristensen K, Van Benthem KJ, Magnusson A, Berg CW, Nielsen A, et al.  
763 glmmTMB balances speed and flexibility among packages for zero-inflated generalized  
764 linear mixed modeling. *The R Journal.* 2017;9(2): 378-400.
- 765 37. Goldbogen JA, Southall BL, DeRuiter SL, Calambokidis J, Friedlaender AS, Hazen EL, et al.  
766 Blue whales respond to simulated mid-frequency military sonar. *Proc R Soc B.* 2013;280:  
767 20130657.

- 768 38. Croll DA, Acevedo-Gutierrez A, Tershy BR, Urban-Ramirez J. The diving behavior of blue  
769 and fin whales: Is dive duration shorter than expected based on oxygen stores? *Comp*  
770 *Biochem Physiol, Part A Mol Integ.* 2001;129(4): 797-809.
- 771 39. Baird RW, Webster DL, Schorr GS, McSweeney DJ, Barlow J. Diel variation in beaked  
772 whale diving behavior. *Mar Mamm Sci.* 2008;24(3): 630–642.
- 773 40. Shearer JM, Quick NJ, Cioffi WR, Baird RW, Webster D, Foley HJ, et al. Diving behaviour  
774 of Cuvier’s beaked whales (*Ziphius cavirostris*) off Cape Hatteras, North Carolina. *R Soc*  
775 *Open Sci.* 2019;6(2): 181728.
- 776 41. Deruiter SL, Southall BL, Calambokidis J, Zimmer WMX, Sadykova D, Falcone EA, et al.  
777 First direct measurements of behavioural responses by Cuvier’s beaked whales to mid-  
778 frequency active sonar. *Bio Lett.* 2013;9: 20130223.
- 779 42. Finneran JJ, Schlundt CE, Bowman V, Jenkins K. Dolphins reduce hearing sensitivity in  
780 anticipation of repetitive impulsive noise exposures. *J Acoust Soc Am.* 2023;153(6): 3372.
- 781 43. Egnor SR, Wickelgren JG, Hauser MD. Tracking silence: adjusting vocal production to avoid  
782 acoustic interference. *J Comp Physiol.* 2007;193: 477-483.
- 783 44. Kiai A, Clemens J, Kössl M, Poeppel D, Hechavarría J. Flexible control of vocal timing in  
784 bats enables escape from acoustic interference. *bioRxiv.* 2023: 2023-05.
- 785 45. Munoz-Santos I, Ríos-Chelén AA. Vermilion flycatchers avoid singing during sudden peaks  
786 of anthropogenic noise. *acta ethologica.* 2022;26(3): 201-210.
- 787 46. Bonabeau E, Theraulaz G, Deneubourg J.L, Aron S, Camazine S. Self-organization in social  
788 insects. *Trends Ecol Evol.* 1997;12(188).
- 789 47. Sumpter DJT. The principles of collective animal behaviour. *Philos Trans R Soc Lond, B.*  
790 2005;361: 5–22.

- 791 48. Caldwell MC, Caldwell DK. Vocalization of naive captive dolphins in small groups. *Science*.  
792 1968;159(3819): 1121-1123.
- 793 49. Francis CD, Ortega CP, Cruz A. Noise pollution changes avian communities and species  
794 interactions. *Curr Biol*. 2009;19(16):1415–1419.
- 795 50. Brown CL, Hardy AR, Barber JR, Fristrup KM, Crooks KR, Angeloni LM. The effect of  
796 human activities and their associated noise on ungulate behavior. *PloS One*. 2012;10;(7):  
797 e40505.
- 798 51. Southall BL, Tollit D, Amaral J, Clark CW, Ellison WT. Managing human activity and  
799 marine mammals: A biologically based, relativistic risk assessment framework. *Front Mar*  
800 *Sci*. 2023;10.
- 801 52. Harris CM, Thomas L, Falcone EA, Hildebrand J, Houser D, Kvadsheim PH, et al. Marine  
802 mammals and sonar: Dose- response studies, the risk- disturbance hypothesis and the role  
803 of exposure context. *J Appl Ecol*. 2018;55:396-404.
- 804 53. Harwood J, King S, Booth C, Donovan C, Schick RS, Thomas L, et al. Understanding the  
805 population consequences of acoustic disturbance for marine mammals. In Popper AN,  
806 Hawkins A, editors. *The effects of noise on aquatic life II*. New York: Springer; 2016. pp.  
807 417-423.
- 808 54. McHuron EA, Adamczak S, Costa DP, Booth C. Estimating reproductive costs in marine  
809 mammal bioenergetic models: A review of current knowledge and data availability.  
810 *Conserv Physiol*. 2023;11(1): coac080.
- 811 55. Natoli A, Cañadas A, Peddemors VM, Aguilar A, Vaquero C, Fernandez-Piqueras P, et al.  
812 Phylogeography and alpha taxonomy of the common dolphin (*Delphinus* sp.). *J Evol Biol*.  
813 2006;19(3): 943-954.

814 56. McGowen MR, Tsagakogeorga G, Álvarez-Carretero S, Dos Reis M, Truebig M, Deaville R,  
815 et al. Phylogenomic resolution of the cetacean tree of life using target sequence capture.  
816 Syst Biol. 2020;69(3): 479-501.

817 57. Oswald JN, Walmsley SF, Casey C, Fregosi S, Southall BL, Janik VM. Species information  
818 in whistle frequency modulation patterns of common dolphins. Phil Trans R Soc B.  
819 2021;376: 20210046.

820

## 821 **Supporting information**

822 **S1 Fig. PAMGuard Whistle Detection Parameters.** Detection settings for the PAMGuard  
823 Whistle and Moan Detector.

824 **S1 File. CEE-by-CEE Analysis.** The main manuscript presents methods and results for  
825 analyzing common dolphin vocal response to simulated mid-frequency sonar, pooling data from  
826 all CEEs. We acknowledge that some readers may be interested in additional information about  
827 each of the 19 CEEs (10 MFAS exposures and nine controls), so we have included additional  
828 methods and results for each CEE.

829 **S2 Fig. Plots of raw per-second whistle detections for all included CEEs.** CEE-ID (year and  
830 number) is given in the bottom right of each page. The red dashed line indicates the start of the  
831 exposure period, with dashed grey lines indicating the timing of each ping (in an MFAS  
832 exposure) or control treatment. The solid gray vertical line indicates the start of the post-  
833 exposure period.

834 **S3 Fig. Boxplots of the change in whistle count from the 5 s before to the 5 s following each**  
835 **of the 24 pings for all CEEs (MFAS and controls).** Boxplot shows median, 25th, and 75th

836 percentiles, with raw whistle count changes as open gray circles. The change following the first  
837 ping is shown as a red star.

838

839

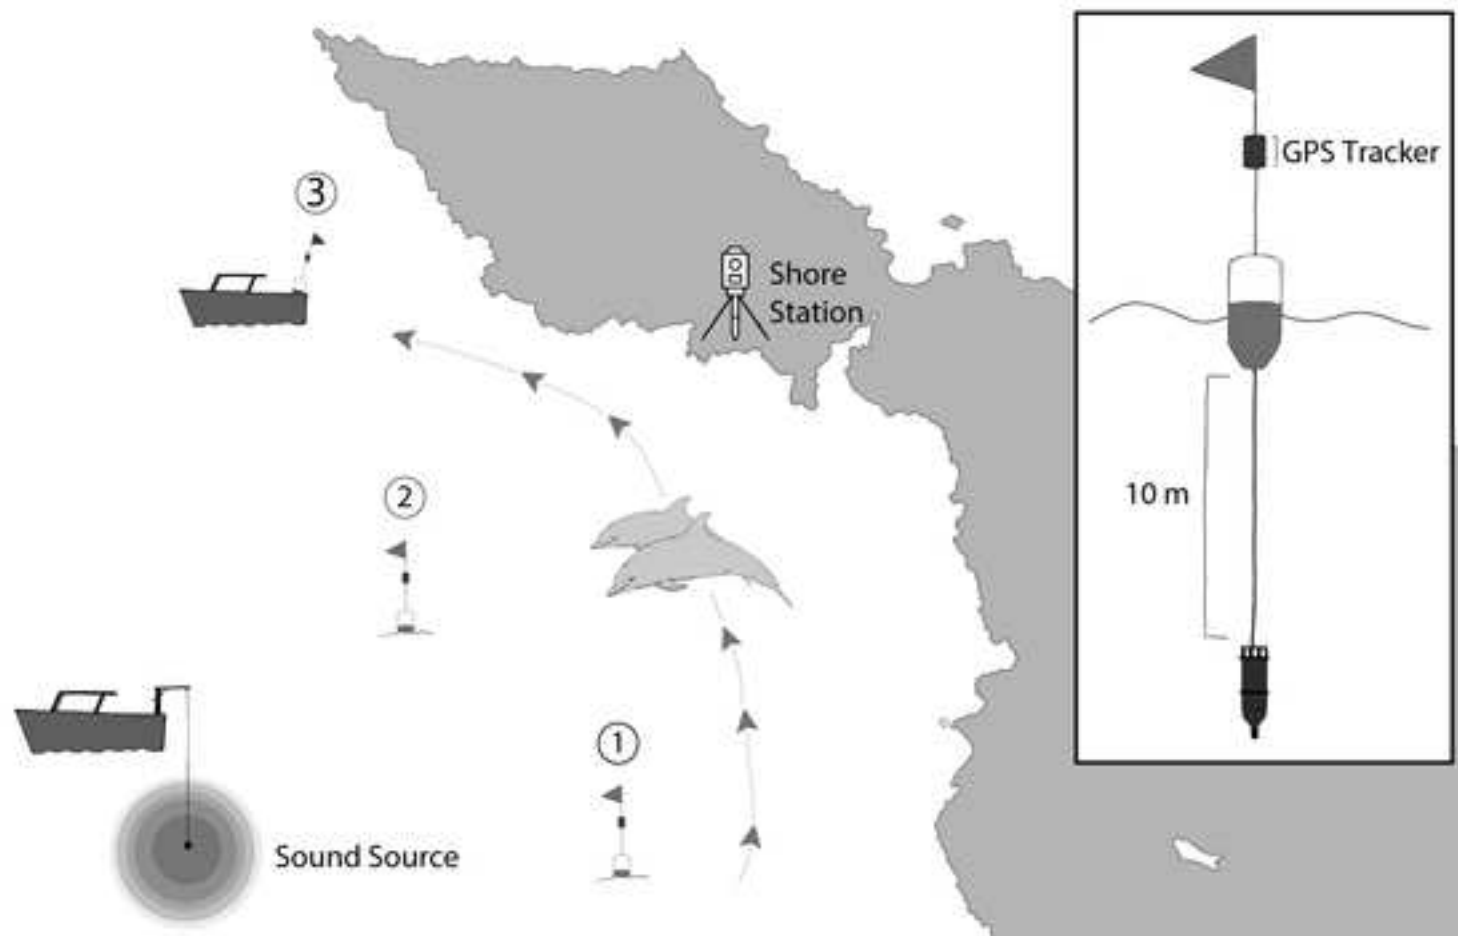

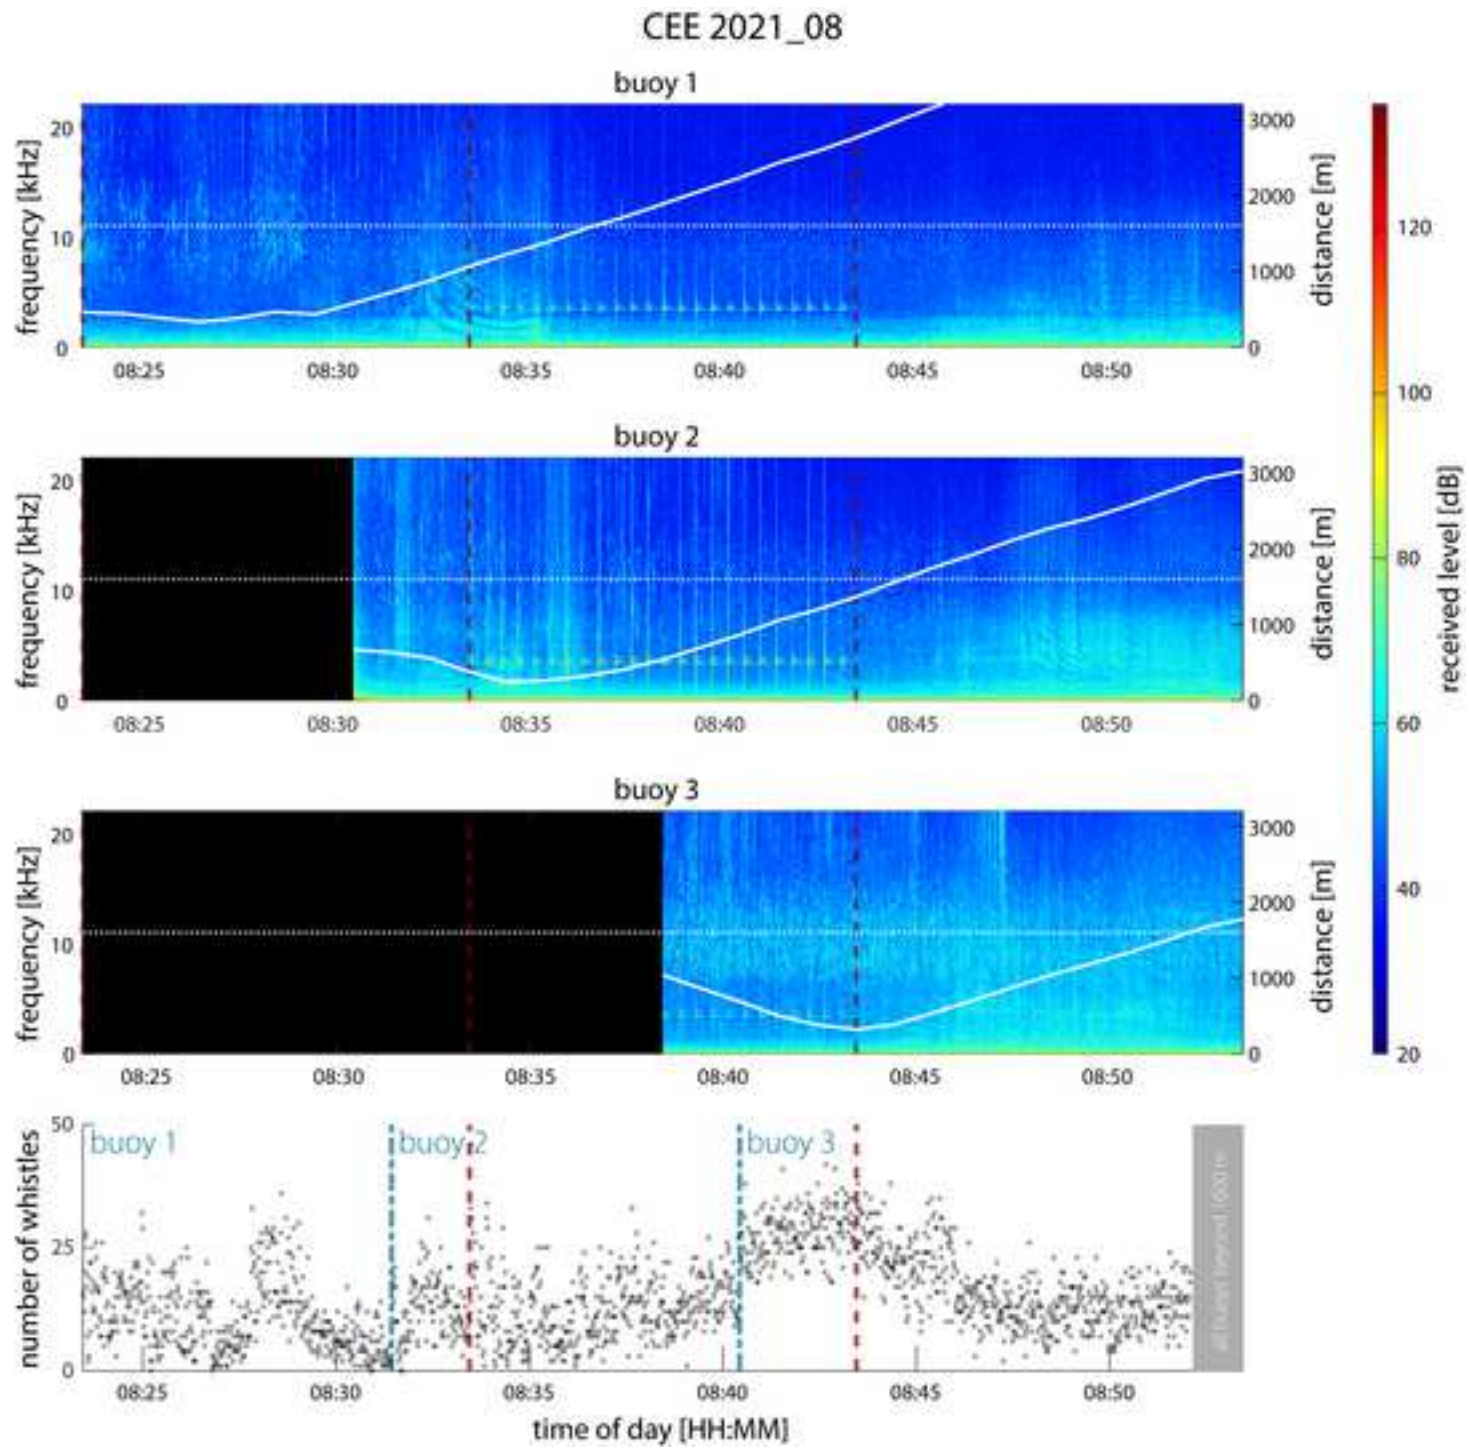



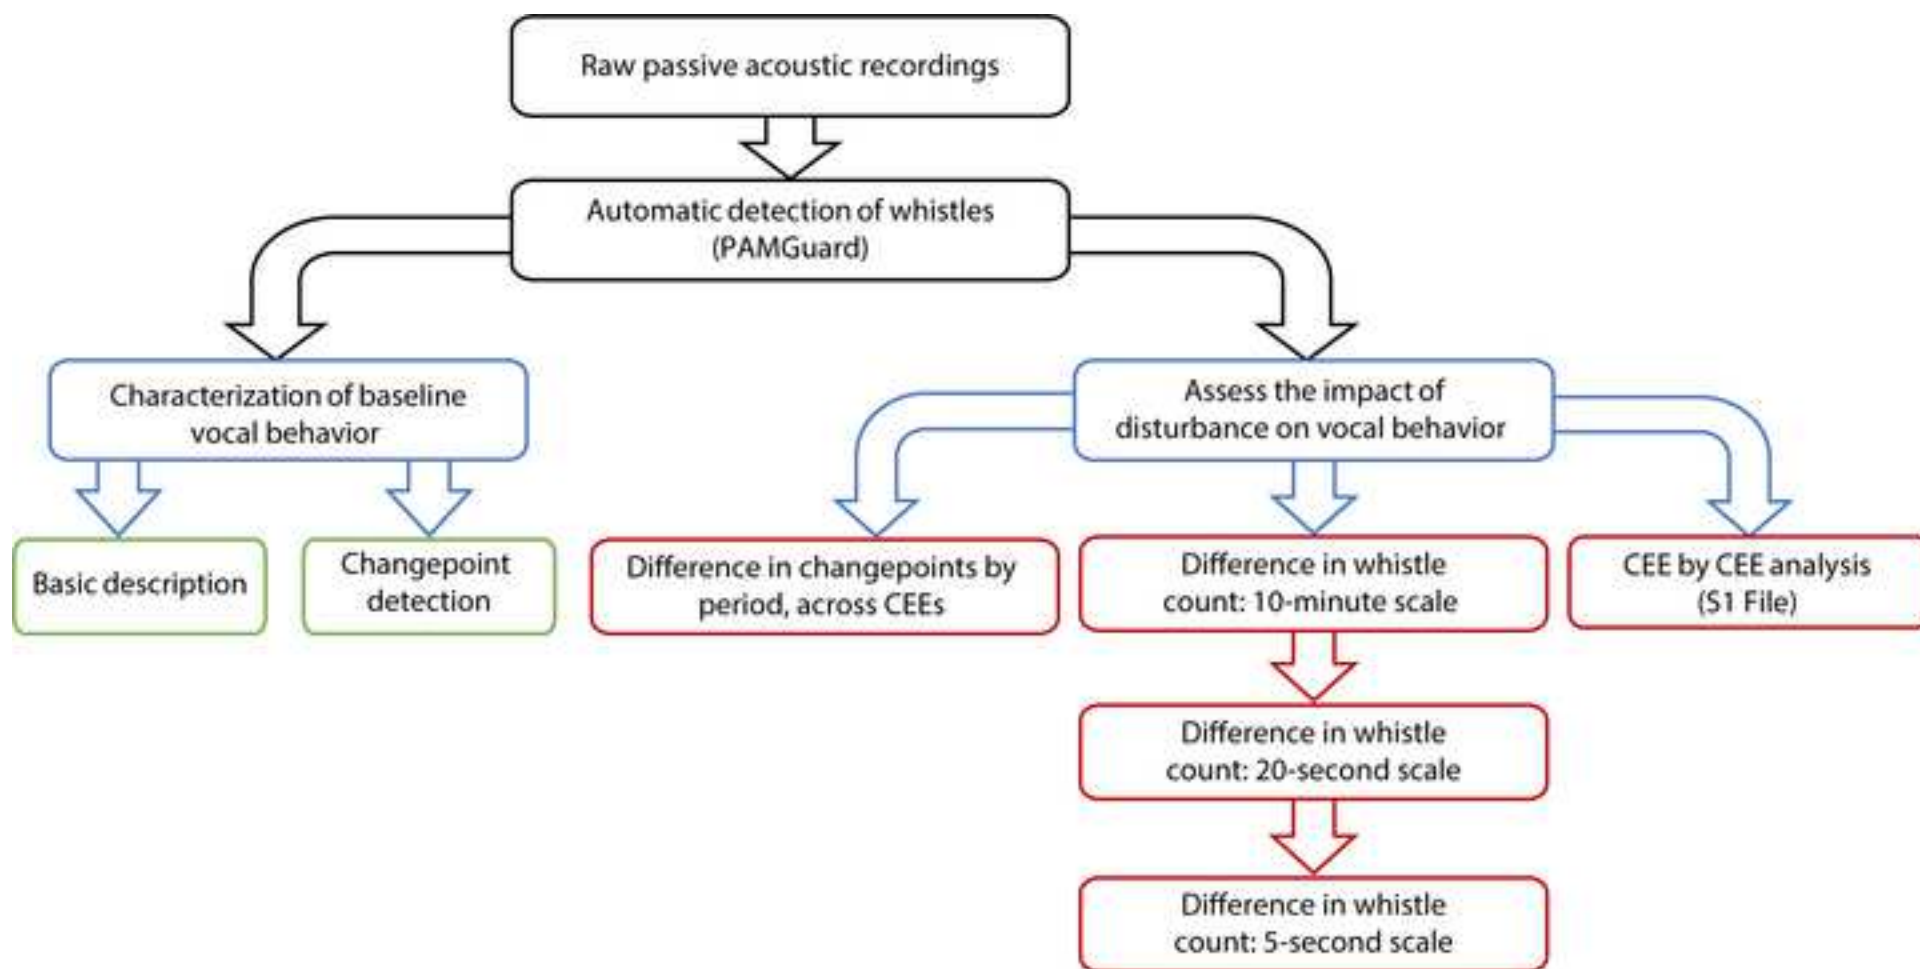

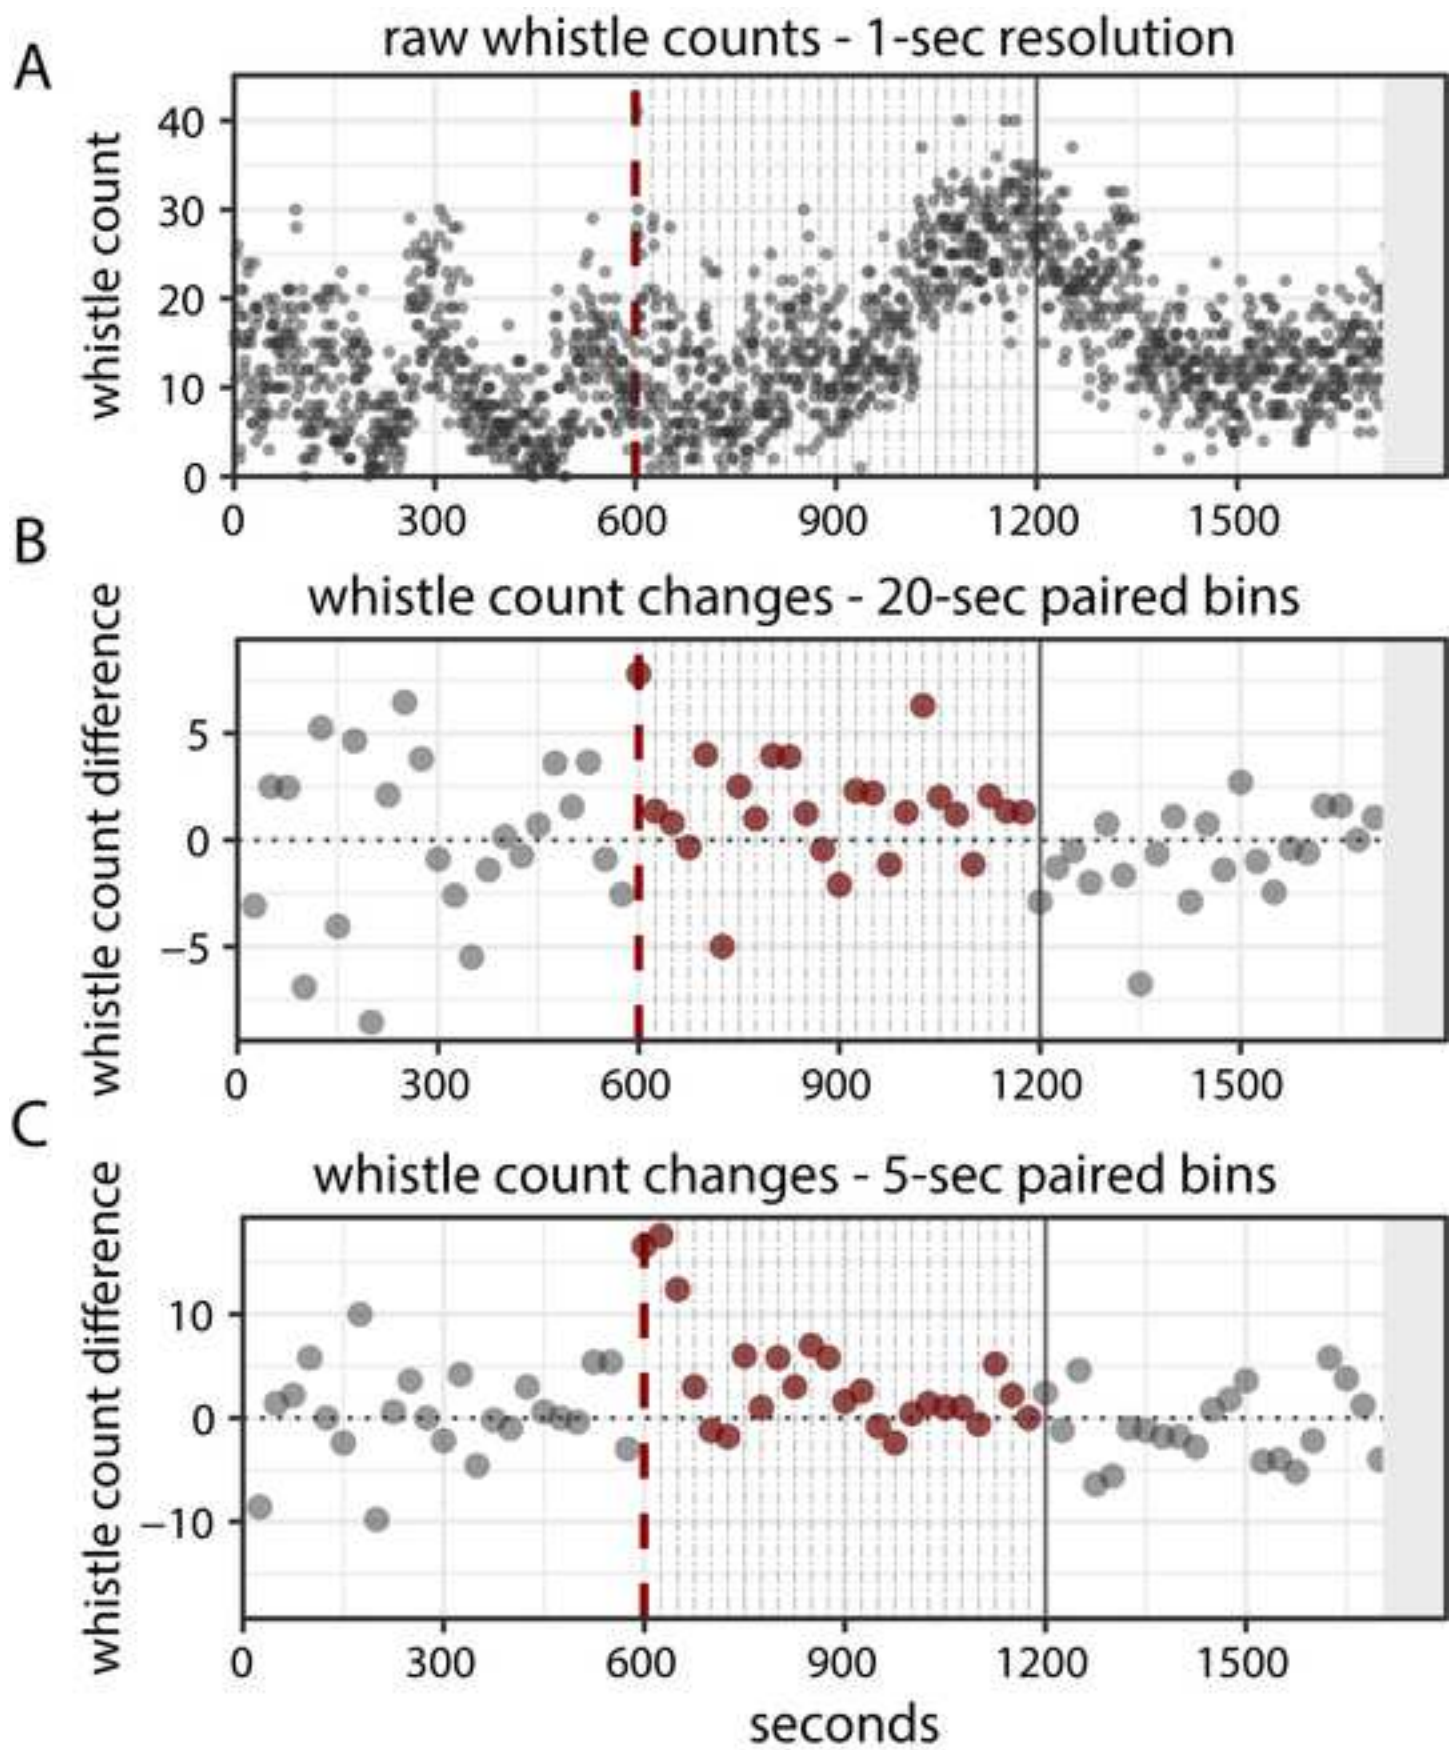



Click here to access/download  
**Supporting Information**  
S1\_Fig.pdf



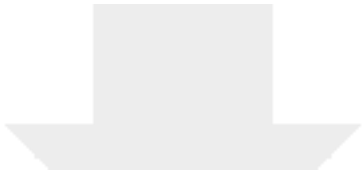

Click here to access/download  
**Supporting Information**  
S1\_File.pdf



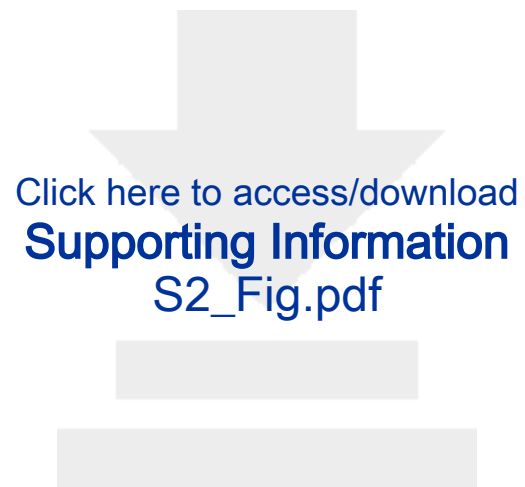

Click here to access/download  
**Supporting Information**  
S2\_Fig.pdf



Click here to access/download  
**Supporting Information**  
S3\_Fig.pdf



1 **Full title: Common dolphin whistle responses to experimental mid-frequency sonar**

Formatted: Centered

2 **Short title: Dolphin acoustic response to sonar**

3

4 \*Caroline Casey<sup>a,b</sup>[✉](#), \*Selene Fregosi<sup>a</sup>[✉](#), Julie N. Oswald<sup>c</sup>, Vincent M. Janik<sup>c</sup>, Fleur Visser<sup>d,e</sup>,

5 Brandon Southall<sup>a,b</sup>

6

7 <sup>a</sup>Southall Environmental Associates, Inc., 9099 Soquel Drive, Aptos, [California, United States](#)

8 [of America](#)A 95003, USA

9 <sup>b</sup>Institute of Marine Sciences, University of California Santa Cruz, 115 McAllister Way, Santa

10 Cruz, CA 95060, USA [California, United States of America](#)

11 <sup>c</sup>Sea Mammal Research Unit, Scottish Oceans Institute, School of Biology, University of St.

12 Andrews, St. Andrews, KY16 8LB, United Kingdom

13 <sup>d</sup>Kelp Marine Research, 1624 CJ, Hoorn, the Netherlands

14 <sup>e</sup>Department of Coastal Systems, Royal Netherlands Institute for Sea Research, P.O. Box 59,

15 1790 AB Den Burg, Texel, the Netherlands

16

17 [\\*](#)

18 Corresponding author

19 [E-mail: cbc Casey@ucsc.edu](mailto:cbc Casey@ucsc.edu)

20

21

22 [†CC and SF are Joint Senior Authors of this work.](#): Caroline Casey, [cbc Casey@ucsc.edu](mailto:cbc Casey@ucsc.edu)

## Abstract

Oceanic delphinids around naval operations are regularly exposed to high source level intense military sonar broadcast within the frequency range of in their hearing range on a regular basis. However, empirically measuring the its impact of sonar on on the behavior of highly social, free-ranging dolphins has proven logistically is challenging. Additionally, baseline variability or the frequency of vocal state-switching among social oceanic dolphins during undisturbed conditions is lacking among social oceanic delphinids, making it difficult to attribute changes in vocal behavior to anthropogenic disturbance. Using a network of drifting acoustic buoys in a three-phased controlled exposure experiments, we investigated the effects of mid-frequency (3-4 kHz) active sonar (MFAS) on whistle production in short-beaked (*Delphinus delphis delphis*) and long-beaked common dolphins (*Delphinus delphis bairdii*) in southern California. Given the complexity of acoustic behavior exhibited by these group-living animals, we conducted our response analysis over varying temporal windows (10 min – 5 s) to describe both longer-term and instantaneous changes in sound production. We found that common dolphins exhibited an acute and pronounced changes in whistle rate in the 5 s following exposure to experimental simulated Navy sonar MFAS. This response was sustained throughout repeated sonar sequential MFAS exposures within an experiments simulating operational conditions to sonar in the experiment, suggesting that dolphins may not habituate to this disturbance. These results indicate that common dolphins exhibit a brief yet significant clearly detectable acoustic responses to MFAS. They also and highlight how different-sized variable temporal analysis windows – tuned to key aspects of baseline vocal behavior as well as experimental parameters related to MFAS exposure – impact the detection of behavioral responses. We suggest that future work with oceanic delphinids explore baseline vocal rates a-

Formatted: Font: 18 pt

Formatted: Don't add space between paragraphs of the same style



46 priori and use information on the rate of change in vocal behavior to inform the analysis time

47 window over which behavioral responses are measured.

48 Millions of oceanic dolphins are exposed and presumably affected by military sonar annually;  
49 however empirically measuring its impact on the behavior of free-ranging dolphins has proven  
50 logistically challenging. Additionally, baseline variability or the frequency of vocal state-  
51 switching during undisturbed conditions is lacking among social oceanic delphinids, making it  
52 difficult to attribute changes in vocal behavior to anthropogenic disturbance. Using a network of  
53 drifting acoustic buoys and a three-phased controlled exposure experiment, we investigated the  
54 effects of mid-frequency (3-4 kHz) active sonar (MFAS) on whistle production in short-beaked  
55 (*Delphinus delphis*) and long-beaked common dolphins (*Delphinus bairdii*) in southern  
56 California. Given the complexity of acoustic behavior exhibited by these group-living species,  
57 we conducted our response analysis over varying temporal windows (10 min – 5 sec) to describe  
58 both longer-term and instantaneous changes in sound production. We found that common  
59 dolphins exhibited an acute and dramatic change in acoustic behavior in the 5-seconds following  
60 exposure to experimental Navy sonar. In some cases, this response was sustained throughout  
61 repeated exposures to sonar in the experiment, suggesting that dolphins may not habituate to this  
62 kind of disturbance. These results suggest that common dolphins exhibit a brief, yet dramatic  
63 acoustic response to MFAS, and highlights how different sized temporal windows – tuned to key  
64 aspects of baseline vocal behavior as well as experimental parameters related to MFAS exposure  
65 – impacts the detection of behavioral responses. We suggest that future work with oceanic  
66 delphinid species explore baseline vocal rates a-priori and use information on the rate of change  
67 in vocal behavior to inform the analysis time-window over which behavioral responses are  
68 measured.

69  
70  
71  
72  
73  
74  
75  
76  
77  
78  
79  
80  
81  
82  
83  
84  
85  
86  
87  
88  
89

## Introduction

Sound production and reception play a critical role in the lives of cetaceans, aiding in important life-history events, including maintenance of social relationships, coordination of group movement, foraging, and evasion of predators [(1)]. Consequently, substantial effort has been directed toward describing cetacean acoustic behavior [(2,3)] and evaluating how it is impacted by human-generated disturbance [(4-8)]. There are many sources of anthropogenic noise pollution (*e.g.*, vessel noise, oil and gas exploration, construction and facilities maintenance, fisheries and aquaculture, military activity) which Many sources of anthropogenic noise pollution (*e.g.*, vessel noise, oil and gas exploration, renewable energy, coastal construction and maintenance, fisheries and aquaculture, and military activity) can have varying short and long-term impacts on marine mammal behavior and health and behavior [(4, 9-11)]. Concentrated research efforts aimed at characterizing these impacts have led to the systematic development of acoustic exposure criteria, informing and improving effective management strategies for both to characterize these impacts have led to the systematic development of acoustic exposure criteria, informing and improving effective management strategies for regulators and industries (for reviews on auditory and behavioral criteria, see 12). Such assessments and criteria have also highlighted species and noise exposure contexts for which information is sparse or unavailable.

Among cetaceans, oceanic delphinids represent an important an essential and logistically challenging group of species for which to evaluate the impact of anthropogenic noise on vocal

Formatted: Indent: First line: 0.5", Don't add space between paragraphs of the same style

Formatted: Font: 18 pt

Formatted: Indent: First line: 0.5"

Formatted: Font: Italic

Formatted: Indent: First line: 0.5"

92 behavior. These animals are highly soniferous, abundant, and often extremely gregarious (pods  
93 of > 500 individuals are common for some species). Sound production has been demonstrated to  
94 play a particularly important a vital role in the regulation of the maintenance of social interactions  
95 relationships and cohesion among group members (*e.g.*, [2,3]). Oceanic delphinids are ubiquitous  
96 around some U.S. Navy operational areas where mid-frequency active sonar (MFAS; 1-10 kHz)  
97 is commonly used for submarine detection in training exercises and warfare, resulting in  
98 associated large numbers of sonar exposures for these federally protected species. Some of the  
99 most powerful MFAS systems (*e.g.*, AN/SQS-53C) use emit repeated pings with fundamental  
100 frequencies in the 3-4 kHz range, ping lengths of approximately 1-3 seconds, and effective  
101 nominal source levels as high as 235 dB dB re 1 μPa at 1 m root-mean-square (RMS) re 1 μPa  
102 that may be transmitted for several minutes minute mins, to hours at high duty cycles (more than 1  
103 ping/min) [(13)]. Aside from the elevated background noise and potential disturbance that may  
104 result from these training exercises [(*e.g.*, 14)], MFAS signals overlap with the frequencies that  
105 oceanic dolphins commonly rely on for social sound (whistle) production. Delphinid whistles are  
106 narrowband tonal sounds with most of the acoustic energy concentrated below 20 kHz [(14-  
107 1615)].

Formatted: Font: (Default) Times New Roman, 12 pt

Commented [SF1]: I would leave this spelled out here vs when it comes after a number leave it short. I think that still addresses their comment but is consistent

109 While MFAS has been linked to mass stranding events of cetaceans [(13,167)] and its  
110 effect on cetaceans has been experimentally evaluated in a handful of species (for a recent  
111 review, see [179]) , the effects impact of sonar on the acoustic behavior of oceanic delphinids  
112 have not been systematically explored. This is due in large part mainly due to the logistical  
113 challenges of applying previously developed methods used in other behavioral response studies  
114 of individual animals to large aggregations of dolphins. Much of the prior research on cetacean

Formatted: Indent: First line: 0.5"

115 behavioral responses to noise has capitalized on the use of using suction-cup attached suction-cup-  
116 attached motion-sensing and acoustic recording tags to characterize responses following  
117 controlled exposure to MFAS [(e.g., 21-2318-20)]. Unfortunately, such tags are challenging to  
118 deploy and are easily shed by small dolphins due to the tag size relative to the smaller body  
119 surface of dolphins, and high drag due to fast swimming speeds, and frequent physical social  
120 contact. Additionally, oceanic delphinids commonly occur in large groups that display  
121 remarkable coordination, making the collective vocal behavior of the group perhaps a more  
122 appropriate focus of analysis [(210)]. Opportunistic passive acoustic studies relying on large,  
123 cabled hydrophone arrays have been used to quantify changes in vocal activity and thus act as a  
124 proxy for the presence of or absence of multiple animals before, during, and after exposure to  
125 MFAS [(224,235)]. Such experiments are valuable but require extensive, high-cost moored  
126 hydrophone arrays with restricted spatial coverage.

127  
128 Previous studies on acoustic responses of oceanic dolphins to Navy sonar have observed  
129 Findings from previous studies of acoustic responses to Navy sonar in oceanic delphinids include  
130 shifting specific frequency components of whistle contours, increasing or decreasing calling rate,  
131 increasing call amplitude, and even mimicry of MFAS elements [(14, 236-258)]. For example,  
132 tagged orcas killer whales (*Orcinus orca*) adjust the high-frequency component of their whistles  
133 during sonar exposure, and increase the number and amplitude of their calls following each ping  
134 [(247)]. False killer whales (*Pseudorca crassidens*) appear to increase their whistle rate and  
135 produce more MFAS-like whistles after exposure to simulated sonar [(256)].

Formatted: Font: (Default) Times New Roman, 12 pt

Formatted: Indent: First line: 0.5"

137 One opportunistic study provided initial insights into the behavioral responses of some  
138 social oceanic delphinids to MFAS. Bottlenose dolphins (*Tursiops truncatus*), common dolphins  
139 (*Delphinus sp.*), Pacific white-sided dolphins (*Lagenorhynchus obliquidens*), and Risso's  
140 dolphins (*Grampus griseus*) exposed to incidental~~incidentally exposed to~~ MFAS showed a  
141 cessation of vocalizations, an increase in the intensity of vocalizations, or a combination of both  
142 [(14)]. Of all delphinid species, common dolphins displayed the widest~~broadest~~ range of  
143 responses, including changing their behavioral state or direction of travel when sonar stopped,  
144 increasing the intensity of vocalizations when sonar began, vocalizing very little or not at all  
145 during sonar ~~exposure~~, or a combination of these observations [(14)]. These results are consistent  
146 with a more recent opportunistic evaluation of delphinid responses to an underwater explosion~~an~~  
147 ~~underwater detonation~~, which showed that whistle rate, complexity, and frequency content all  
148 varied in response to the explosive event [26](30). Depending upon the frequency, intensity, and  
149 consistency of these kinds of noise exposures, such behavioral changes could result in  
150 physiological consequences that impact overall population health [(2731)]. Unfortunately,  
151 information on baseline variability or ~~and~~ the frequency of vocal state-switching during  
152 undisturbed conditions is lacking among ~~free-ranging~~, social\_ oceanic delphinids, making it  
153 challenging to interpret the responses observed. While opportunistic studies of delphinid acoustic  
154 responses to sonar are insightful, a detailed assessment under controlled experimental conditions  
155 is needed to understand the extent to which delphinids are impacted by this kind of  
156 disturbance~~MFAS impacts oceanic delphinids~~.

Formatted: Indent: First line: 0.5"

158 Quantifying vocal behavior in these taxa is complicated by the fact that dolphin acoustic  
159 behavior is dynamic, variable, and influenced by a myriad of social and environmental factors

Formatted: Indent: First line: 0.5"

160 [28](32). Measurements of acoustic behavior and how it changes in response to disturbance must  
161 be made Acoustic behavior and how it changes in response to disturbance must be measured  
162 across some predetermined interval of time time interval. In previous cetacean behavioral  
163 response studies using a conventional controlled exposure experimental (CEE) design, this  
164 temporal window was often dictated by logistical limitations of the technology being used (*e.g.*,  
165 battery power of tags, the feasibility of continuous behavioral observations, etc.), or designed to  
166 match the duration of anthropogenic noise source being evaluated. However, averaging vocal  
167 behavior over long time windows may result in missing instantaneous or shorter duration  
168 responses that occur at the onset of exposure or at scales that are more biologically meaningful to  
169 the individuals exposed. One way to address this is to examine acoustic metrics computed over a  
170 variety of various time windows to determine if and/or and when we can attribute a change in  
171 vocal behavior to a known, controlled disturbance.

173 For this study, different broad and fine-scale analytical approaches were used to investigate  
174 the Here, we apply and compare different broad and fine-scale analytical approaches to  
175 analyzing delphinid vocal behavior and effects of experimental controlled MFAS on whistle  
176 production using experimental methods in short-beaked (*Delphinus delphis delphis*) and long-  
177 beaked common dolphins (*Delphinus delphis bairdii*) in southern California. By assessing group-  
178 level vocal behavior across different time scales, we aimed to:

- 179 1. Describe the variability in baseline vocal behavior of common dolphin aggregations  
180 during control conditions.

181 1.

Formatted: Font: (Default) Times New Roman, 12 pt

Formatted: Indent: First line: 0.25"

Formatted: Font color: Black

Formatted: Numbered + Level: 1 + Numbering Style: 1, 2, 3, ... + Start at: 1 + Alignment: Left + Aligned at: 0.25" + Indent at: 0.5"

182 2. Characterize Compare the types of vocal responses detected during a controlled exposure  
183 to MFAS using broad and fine-scale temporal resolution. across broad and fine temporal  
184 scales.

185 Given the need to establish sampling regimes that can be applied and compared across studies,  
186 our objective is our objective is to provide an informative framework for assessing the complex  
187 acoustic behavior exhibited by group-living species. We highlight how using different  
188 sized different-sized temporal windows – tuned to key aspects of baseline vocal behavior as well  
189 as experimental parameters related to MFAS exposure – impacts the detection of behavioral  
190 responses.

## 192 Materials and methods

Formatted: Font: 18 pt

### 193 A. General Methods

194 Controlled exposure experiments (CEEs) CEEs were conducted with two subspecies of common  
195 dolphins. This study was as part of a broader effort aimed at quantifying to quantify group-level  
196 responsiveness of oceanic delphinids to military sonar using CEEs. Common dolphins occur as  
197 two separate species within our study area (33), around Santa Catalina Island, located off the  
198 coast of southern California, USA. Since they regularly occur in mixed-species groups, we  
199 pooled data for the two species subspecies to describe baseline vocal data and included  
200 species subspecies as a potential explanatory variable in our models. The project integrated  
201 multiple different data streams, including shore-based tracking of dolphin schools pods, passive  
202 acoustics to record vocal activity, and photogrammetry to measure fine-scale behavior [29](34).  
203 This work was conducted between 2017-2021. We chose our study area because it lies near the  
204 Southern California Offshore Range (SCORE) – a tactical training area for the U.S. Navy Pacific

205 Fleet located off the west side of San Clemente Island – where animals regularly encounter the  
206 types of signals we used in our experiment.

207

208 CEEs were composed of comprised three discrete phases: pre-exposure (baseline),  
209 exposure using intermittent simulated MFAS signals, and post-exposure. In a subset of  
210 experiments, no MFAS signals were broadcast during the exposure phase, serving as controls. In  
211 control trials, the equipment was lowered into the water from the exposure boat but no MFAS  
212 signals were broadcast. For details about the experimental source and sound source  
213 characteristics – including calculations of received levels – see Durban et al. 2022 [29]. 2022  
214 (34). Each experimental phase was 10 minute mins in duration. During exposure phases, MFAS  
215 ‘pings’ of 1.6 s in duration consisting of three tonal and frequency modulated elements between  
216 3.5-4 kHz were transmitted (see: frequency-modulated elements between 3.5-4 kHz were  
217 transmitted Southall et al., 2012 (35) for additional details on the sound source and signal  
218 parameters). Pings were emitted at a broadband source level of 212 dB re 1µPa RMS every 25  
219 seconds, which is similar in repetition rate, duty cycle, and the absence of a ramped-up source  
220 level (as used in some previous MFAS CEEs) to some certain active Navy MFAS systems (*e.g.*,  
221 helicopter-dipped sonar systems). Up to 24 total pings were emitted per 10-minute min exposure  
222 phase, provided that no permit-mandated shutdowns occurred for animals occurring no permit-  
223 mandated shutdowns were implemented for animals within 200 m of the active sound source  
224 (this occurred happened in only one playback CEE). The sound source was positioned relative to  
225 focal animal groups using noise sound propagation modeling to ensure received levels at focal  
226 animals occurred at maximum levels of were no greater than 140-160 dB dB re 1µPa RMSRMS.

227

Formatted: Indent: First line: 0.5"



228 For every CEE, species subspecies identity (based on differences in genetics, morphology,  
229 and pigmentation) was determined using a combination of aerial images obtained from drone  
230 footage, genetic sequencing from biopsy samples, and visual observation. Additionally, group  
231 size was characterized by experienced shore-based observers using strong magnification  
232 binoculars or a binocular scope located at elevated locations (~70 m) that enabled, enabling a  
233 broad overview of the research area (up to 20 km from shore). Shore-based tracking of animals  
234 could be conducted for groups up to 7 km from shore. Focal follows included estimation  
235 of estimating low, best, and high group size, the number of subgroups (defined as all individuals  
236 in closer proximity to each other than to closer to each other than other individuals in the area),  
237 the range of inter-individual spacings within subgroups, and distances between subgroups. These  
238 observations were taken continuously throughout the experiment at 2-minute min intervals. For a  
239 full complete description of each of these methods, see Visser et al., 2014 (36) and Durban et al.,  
240 2022 (34). [29,30]

Formatted: Indent: First line: 0.5"

## 242 **B. Acoustic dData cCollection and pProcessing**

Formatted: Font: 16 pt

Formatted: Font: 16 pt

Formatted: Font: 16 pt

Formatted: Font: 16 pt

### 244 **1. Passive aAcoustic mMonitoring**

Formatted: Font: 16 pt

Formatted: Font: 14 pt, Not Italic

245 Passive acoustic recordings were obtained from each target group of dolphins using three  
246 drifting, remote-deployed acoustic recording units. Up to three separate recording units were  
247 tactically positioned and recovered from a single small (~6 m) rigid-hull inflatable boat, with the  
248 objective of placing one recording unit within 500 m of the predicted trajectory of the dolphins  
249 during each CEE phase (Fig. 1). Each recording unit consisted of a surface buoy and flag with an  
250 underwater recorder suspended by 10 m of line. The recorder was either a SoundTrap ST300

Formatted: Level 2

Formatted: Font: 14 pt, Not Italic

Formatted: Font: 14 pt, Not Italic

Formatted: Font: 14 pt

Formatted: Indent: First line: 0.5"

251 (Ocean Instruments NZ, Auckland, New Zealand) or a SNAP Recorder (Loggerhead  
252 Instruments, Sarasota, FL, USA). Both recorded via a single omnidirectional calibrated  
253 hydrophone (SoundTrap: integrated hydrophone, frequency response 0.02–60 kHz  $\pm$  3 dB re  
254 1 $\mu$ Pa, end-to-end sensitivity -178 dB re 1 $\mu$ Pa/V; SNAP: HTI-96-MIN hydrophone, frequency  
255 response 1.0-20 kHz  $\pm$  3 dB re 1 $\mu$ Pa, end-to-end sensitivity -164 dB re 1 $\mu$ Pa/V, frequency  
256 response 1.0-20 kHz  $\pm$  3 dB) which was suspended by a shock-mounted cable at a depth of 10 m.  
257 All recording units had a Global Positional System (GPS) tracking device (Trace, SPOT LLC,  
258 Chantilly, VA, USA) that recorded the location of the instrument once every minute min (Fig. 1).  
259 Five-minute min WAV files were continuously recorded at either 96 kHz sampling rate with 16-  
260 bit resolution (SoundTrap) or a 96 kHz sampling rate with 44.1 kHz sampling rate with a 16-bit  
261 resolution (SoundTrap) or a 44.1 kHz sampling rate with a 16-bit resolution (SNAP).

263 **Figure 1. A schematic representation of the placement of acoustic recorders (see inset for**  
264 **floating acoustic recording unit) relative to the track of the focal group of dolphins. A single**  
265 **buoy and associated hydrophone were placed within 500 m of the animals during the pre-**  
266 **exposure, exposure, and post-exposure period.** The first buoy is placed within 500m of the  
267 animals during the pre-exposure, the second during the exposure, and the third during the post-  
268 exposure period. The sound source is located at approximately 1 km from the dolphins at the  
269 onset of the exposure period. Note that the source vessel was idling in neutral and was not  
270 moving throughout the duration of the exposure period. The dashed line with associated arrows  
271 represents the movement path of the focal group. Note the The shore station monitoring the group  
272 was positioned on land and is denoted by the theodolite symbol. presence of the shore station

Formatted: Font: Not Bold

Formatted: Font: Not Bold

Formatted: Font: Not Bold

273 positioned on land.The map was inspired by images from the NASA Earth Observatory (public  
274 domain) and was not drawn to scale (for illustrative purposes only).

276 To evaluate which PAM recording unit was closest to the focal group given the dolphins'  
277 frequently unpredictable course, the relative proximity of each hydrophone to the animals was  
278 determined *post-hoc*Given the dolphins' frequently unpredictable course, the relative proximity  
279 of each hydrophone to the animals was determined post-hoc to evaluate which PAM recording  
280 unit was closest to the focal group. The animals' location was known from an associated  
281 octocopter drone flight (APO-42, Aerial Imaging Solutions) that utilized a micro 4/3 digital  
282 camera (Olympus E-PM2) and 25 mm lens (Olympus M. Zuiko F1.8) mounted to a gimbal.  
283 centered over the focal The octocopter flew group at approximately 60 m directly above the  
284 dolphins to provide sufficient pixel resolution while decreasing the potential for disturbance [(see  
285 2934 for details)]. The relative distances (in meters) between the focal group (from the drone's  
286 GPS) and each recorder (from their flag-mounted GPS units) were estimated for every  
287 minute~~min~~ of the 30-minute~~min~~ experiment using the Haversine formula and linear interpolation  
288 in in a custom MATLAB script (Mathworks, Natick, MA, USA, Fig. 2). Recordings from the  
289 buoy closest to the focal group at 1-minute~~min~~ intervals were used for all subsequent analyses.  
290 Any recordings made when a recorder~~s~~ that exceeded 1600 meters1.6 km from the focal group  
291 (even if thethe recorder was the closest availableey were the closest recorder deployed) were  
292 excluded. This threshold was selected based on a previous assessment of detection ranges of  
293 playbacks of odontocete whistles (10-20 kHz) by bottom-mounted hydrophones in southern  
294 California, which demonstrated a 95% probability of detection of a 135 dB re 1  $\mu$ Pa dolphin  
295 whistle at 1,600 meters km with an SNR of 2.2 dB re 1  $\mu$ Pa [31](37). This assessment was

Formatted: Indent: First line: 0.5"

296 supported by the drop-off in whistle amplitude observed in the spectrograms (*post-hoc*) when  
297 any buoy surpassed 1600-1800 1.6-1.8 km distance from the focal group (Fig. 2). After  
298 accounting for this distance cut-off, 9.25 total hours of recordings remained and were used in  
299 subsequent analysis.

301 **Figure 2. Spectrograms of each of the three recorders strategically~~strategically~~ placed on**  
302 **the trackline~~track line~~ of a moving group of dolphins and associated whistle**  
303 **counts~~detections from the buoy closest to the animals at each minute.~~ from each of the**  
304 **three recorders that were strategically placed on the track-line~~track line~~ of a moving**  
305 **group of dolphins.** The solid white line represents the distance between the recorder and the  
306 drone\_ flight centered over the focal group (units on the right y-axis), the red dashed vertical lines  
307 denote the experimental period, and the horizontal white dashed line marks the 1600 m 1.6 km  
308 threshold. Estimates of the relative distance between the focal group and each of the  
309 recorders~~recorder~~ were were produced assessed every minute min of the 30-minute min  
310 experiment. The bottom panel shows the number of whistles detected on the closest recorder  
311 using the PAMGuard Whistle and Moan Detector. Times when the closest buoy switched is  
312 indicated by the blue dashed lines and associated blue numbers The blue dashed lines and  
313 associated blue numbers indicate times when the closest buoy switched and which buoy was  
314 closest. The grey area denotes where whistle detections were excluded due to the recorder  
315 distance exceeding 1.6 km. MFAS pings denoted by the vertical lines on the spectrogram during  
316 the experimental period.

## 318 **2. Quantifying whistle production and variability**

Formatted: Font: 14 pt, Not Italic

Formatted: Font: 14 pt

319 While common dolphins are known to emit buzzes, echolocation clicks, and whistles, we  
320 focused our efforts on characterizing whistle production since they are the key critical signal for  
321 long distance long-distance communication and play a major significant role in group cohesion  
322 and coordination [(2), 38). Extraction of whole whistle contours in high background noise with  
323 overlapping whistles is extremely exceptionally challenging and results in high rates of missed  
324 detections, irrespective of methodology. To create a dataset in which error rates were kept  
325 constant across different phases of the experiment experimental phases, we used the Whistle and  
326 Moan Detector (WMD) module in PAMGuard (v 2.01.05), 39) [32]. The WMD deals with  
327 uncertainties by only detecting parts of whistles that clearly stand out above noise using  
328 standardized settings across extractions. It is important to note that this often leads to a  
329 fragmentation of whistles, with one whistle being split into several independent sections. Thus,  
330 whistle counts detections reported here are not comparable to ones obtained with whole whistle  
331 extraction in other studies. However, for our assessment of changes in vocal activity between  
332 different experimental phases, it was more important to keep error rates constant to allow for  
333 relative comparisons. A qualitative assessment of detector performance within each CEE  
334 ensured that variation in whistle detections accurately reflected variation in whistle activity  
335 observed in the spectrograms.

Formatted: Indent: First line: 0.5"

Formatted: Font color: Text 1

Formatted: Font: Times New Roman, 12 pt, Font color: Text 1

Formatted: Font color: Text 1

337 The WMD operates on the spectrogram output of the PAMGuard Fast Fourier Transform  
338 (FFT) Engine module. We optimized settings for the FFT Engine to provide comparable  
339 frequency and temporal resolution of the calculated spectrograms across the two recorders and  
340 sampling rates. For the SoundTrap recorders, which had a sampling rate of 96 kHz, the FFT  
341 Engine module calculated computed spectrograms with an FFT length 1024, hop size of 1024,

Formatted: Indent: First line: 0.5"

342 hop size of 512, and a Hann window. This resulted in providing a frequency resolution of 93.75  
343 Hz and time resolution of 10.67 ms. For the SNAP recorders, which had a sampling rate of 44.1  
344 kHz, spectrograms were calculated with a Hann window, FFT length 512 and hop size 256, and  
345 hop size 256, resulting resulting in a frequency resolution of 86.13 kHz and time resolution of  
346 11.61 ms. The WMD was set to detect whistles between 5 kHz and 20 kHz to exclude detection  
347 of the tonal sounds from the simulated mid-frequency sonar playbacks source (below 5 kHz) and  
348 to standardize the upper detection limit across the two sampling rates and avoid any possible  
349 edge effects near the Nyquist frequency of the lower sampling rate. The detection threshold was  
350 set at 6.0 dB re 1 μPa. Full WMD settings can be found are in the supplementary materials (S1  
351 Appendix Fig). While the fundamental sonar tonals were excluded by the 5 kHz low-pass  
352 cut high-pass cut-off for detections, the high source level of the simulated MFAS resulted in the  
353 presence of harmonics in some of the recordings. All harmonics were manually annotated in  
354 PAMGuard Viewer using the Spectrogram Annotation module for later removal.

Commented [SF2]: This would be high-pass, correct? Or just 'low cut-off'?

356 Detected wWhistles were automatically exported from the PAMGuard detection database  
357 using the PAMGuard MATLAB tools (<https://github.com/PAMGuard/PAMGuardMatlab>).  
358 Annotated MFAS harmonics were removed using and R package `PAMmiscPal` in R version  
359 4.3.1 [33,34,32,33](40). MFAS harmonics were removed, and Wwhistles were quantified at 1-  
360 second resolution. Bbecause whistles are were often longer than 1-second 1 s in duration, the  
361 total number of whistles starting within a 1-second bin was counted, providing a metric for  
362 whistle activity as detected whistles detections per second. For brevity, this is referred to as  
363 whistle count throughout the remainder of this manuscript.

Formatted: Indent: First line: 0.5"

## C. Characterization of baseline vocal behavior

### 1. Overall whistle count

To assess common dolphin vocal behavior in control conditions, we calculated the mean and median whistle count per second for the full 30-minute experiment for each control CEE. We calculated the mean and median whistle count per second for the entire 30-min experiment for each control CEE to assess common dolphin vocal behavior under control conditions. These data were evaluated with reference to concurrent data collected by group size estimates collected by experienced shore-based focal follow observations that quantified group size. observers.

### 2. Changepoint analysis

To describe the natural variability in vocal behavior during control conditions, we applied a changepoint analytical approach to the control CEE data collected for both common dolphin species. We applied a changepoint analytical approach to the control CEE data collected for both common dolphin subspecies to describe the natural variability in vocal behavior during control conditions. Change point detection is used to pinpoint times when the probability distribution of a time series changes (*i.e.*, vocal state changes). The aim is to identify times at which when either the mean or variance deviates from the expected trends in the dataset and estimate the number and position of all changepoints. Effectively, this approach detects points in time when a significant change in whistle count occurs. First, a 5-second smoothing window was applied to the raw 1-second whistle count data. Then, changepoints in both mean whistle count and whistle count variance were detected using the ‘changepoint’ package in R version 2.2.4 [(34-35)41]. The “BinSeg” (Binary Segmentation) algorithm was used. This provided the number and

Formatted: Font: 16 pt

Formatted: Font: 14 pt, Not Italic

Formatted: Font: 14 pt

Formatted: Indent: First line: 0.5"

Formatted: Font: 14 pt, Not Italic

Formatted: Font: 14 pt

Formatted: Indent: First line: 0.5"

387 locations of all state changes in both the mean and the variance of whistle count over the total the  
388 mean and the variance of whistle count over the 30-minutemin sampling period.

#### 390 **D. Assessing the impact of disturbance on vocal behavior**

391 We employed a hierarchical approach to characterizing the types of vocal responses that  
392 might be detected during controlled exposure to MFAS using broad and fine-scale time windows  
393 Using broad and fine-scale time windows, we employed a hierarchical approach to  
394 characterizing the types of vocal responses that might be detected during controlled exposure to  
395 MFAS (Fig. 3). All statistical analyses were carried out using R version 4.3.1 [34] (R Core Team  
396 2023).

398 **Figure 3. Flowchart of methods implemented to assess changes in common dolphin vocal**  
399 **behavior during controlled exposure to MFAS.** Methods include pre-processing of acoustic  
400 data and to baseline vocal behavior analysis and as well as a hierarchical assessment of  
401 disturbance on vocal behavior at four three temporal scales. Alpha-numeric references  
402 corresponds to the sub-heading in the methods section.

#### 404 **1. Difference in changepoints by period across CEEs**

405 We conducted a changepoint analysis on all CEEs (both controls and MFAS) to evaluate  
406 whether common dolphins change the frequency of vocal state switching as a result of exposure  
407 to MFAS. We used the same general method as in Section C.2 described above but quantified the  
408 number of changepoints in the 10-minutemin pre-exposure and 10-minutemin exposure periods  
409 separately. Changepoints were detected for both the mean and variance of the whistle count data.

Formatted: Font: 14 pt

Formatted: Indent: First line: 0.5"

Formatted: Font: 14 pt, Not Italic

Formatted: Font: 14 pt

Formatted: Indent: First line: 0.5"



410 The difference in the number of changepoints between the two periods was calculated, and an  
411 unpaired t-test was used to evaluate any significant differences between controls and MFAS  
412 experiments.

413  
414 **2. Characterize the impact of MFAS exposure on whistle count: 10-minute<sub>min</sub>**  
415 **time scale**

416 To identify potential broad scale changes in whistle count in response to a simulated MFAS  
417 exposure broad-scale changes in whistle count in response to simulated MFAS exposure, we  
418 pooled and analyzed all CEEs (both controls and MFAS exposures) and analyzed them using a  
419 Generalized Linear Mixed Model (GLMM) approach, implemented using R package  
420 ``glmmTMB` [(36542)]`. We modeled the absolute difference in median whistle count between  
421 the 10-minute<sub>min</sub> pre-exposure period and the 10-minute<sub>min</sub> exposure period (*periodDiff*) as a  
422 function of CEE type (*ceeType*; either control or simulated MFAS), a random identity variable  
423 (*ceeNum*), dolphin species subspecies (*subSpecies*), the best estimate of total group size from the  
424 shore based shore-based observers (*groupSize*), and the mean distance between the focal group  
425 and the closest buoy for the full entire CEE (*buoyDistance*). Using the absolute value for  
426 difference in median whistle count enabled us to explore the magnitude of a potential response.  
427 We modeled the relationship using a negative binomial distribution, which fit the count-type data  
428 after the transformation. Our full model was:

429  
430 
$$periodDiff \sim ceeType + ceeNum + subSpecies + groupSize + buoyDist$$

Formatted: Font: 14 pt, Not Italic

Formatted: Font: 14 pt, Not Italic

Formatted: Font: 14 pt

Formatted: Font: Italic

432 We used backward elimination,  $\Delta$ AIC, and analysis of variance (ANOVA) to select the best  
433 model. We used backward elimination and resulting AIC scores to select our final model and  
434 present the results of the final model below.

436 **3. Characterize the impact of MFAS exposure on whistle count: 20-second**  
437 **time scale**

438 To characterize more instantaneous changes in whistle production in response to MFAS  
439 exposure, we compared dolphin whistle counts detections in the 20 seconds before and 20  
440 seconds after each individual ping (n = 24 1-second pings per 10-minute experimental period,  
441 ~25 seconds between each ping) for both MFAS experiments and controls. We selected this time  
442 window to capture sustained variation in whistling behavior within a single ping cycle, without  
443 overlap between cycles. Differences between these two sequential time bins were calculated by  
444 subtracting the mean whistle count for the first bin from the mean whistle count of the second  
445 bin (Fig. 4B). The first ping started at time 0, the second ping at time at 25 seconds, and so on.  
446 Because no actual pings were present in the control experiments, we calculated the change in  
447 whistle count surrounding ‘ghost pings’ which were chosen to be timed at the same time as when  
448 real pings would have occurred during a time points placed at the same time as when actual pings  
449 would have occurred during an MFAS CEE.

451 **Figure 4. Example plots of (A) raw whistle counts detections over time, (B) changes in**  
452 **whistle count between 20 second duration sequential bins, and (C) changes in whistle count**  
453 **between 5 second duration sequential bins, for the pre-exposure, exposure, 20-s duration**  
454 **sequential bins, and (C) changes in whistle count between 5-s duration sequential bins for**

Formatted: Font: 14 pt, Not Italic

Formatted: Font: 14 pt

Formatted: Indent: First line: 0.5"

455 **the pre-exposure, exposure, and post-exposure period within one CEE.** The dashed vertical  
456 red line indicates the onset of exposure, and the sequential gray dashed lines represent each ping  
457 within the exposure period. Pre-exposure and post-**Post**-exposure periods were not included in  
458 the modeling analysis but are presented here for reference. The grey shaded area denotes where  
459 whistle detections were excluded due to the recorder distance exceeding 1.6 km.  
460

Formatted: Font: Not Bold

Formatted: Font: Not Bold

461 Similar to Like the analysis at the 10-minute min time scale, we used a generalized linear  
462 mixed model GLMM approach (using R package `glmmTMB`) to identify potential significant  
463 differences immediately following pings (*pingChange*) in MFAS experiments compared to  
464 controls where no pings were present. In addition to the previous fixed effects included at the 10-  
465 minute min scale (*ceeType*, *ceeNum*, subSpecies, *buoyDistance*, and *groupSize*), we also  
466 included median whistle count per second for the entire experimental period to account for the  
467 varied baseline whistling activity across CEEs (*medWhist*).  
468

Formatted: Indent: First line: 0.5"

469 *pingChange* ~ *ceeType* + *ceeNum* + subSpecies + *groupSize* + *buoyDist* + *medWhist*  
470

Formatted: Font: Italic

471 Binned ping change data were generally normally distributed, but were zero- inflated, so  
472 we used a Gaussian distribution for the primary model and additionally modeled the zero  
473 inflation as a function of median whistle count (*medWhist*). We used backward elimination,  
474  $\Delta$ AIC, and analysis of variance (ANOVA) to select the best model.  
475

Formatted: Indent: First line: 0.5"

476 **4. Characterize the impact of MFAS exposure on whistle count: 5-second time**  
477 **scale**

Formatted: Font: 14 pt, Not Italic

478 We repeated the analysis conducted above in section D3, but over a shorter 5 second 5-s  
479 time window to investigate potential shorter duration instantaneous changes immediately  
480 following pings (Fig. 4C).

Formatted: Indent: First line: 0.5"

481  
482 Similar to Like the above analysis, we used a generalized linear mixed model GLMM approach to  
483 identify potential significant differences in whistle count changes in the 5 seconds following  
484 compared to the 5 seconds before each ping (*pingChange*) for MFAS experiments compared to  
485 controls. We used the same fixed effects implemented at the 20-second scale (*ceeType*, *ceeNum*,  
486 *[subSpecies*, *buoyDistance*, and *groupSize*, *medWhist*) but also included an autocorrelation  
487 structure to this analysis *AR(1)* to account for clear apparent temporal lag effects in exploratory  
488 plots.

489  
490 *pingChange* ~ *ceeType* + *ceeNum* + *subSpecies* + *groupSize* + *buoyDist* + *medWhist* + *AR(1)*

Formatted: Font: Italic

491  
492 Like the 20-second scale, binned ping change data were normally distributed and zero-inflated;  
493 a Gaussian distribution was used for the conditional model and zero-inflation was modeled as a  
494 function of median whistle count (*medWhist*). We used backward elimination,  $\Delta$ AIC, and  
495 ANOVA to select the final model.

## 496 497 **5. CEE-by-CEE analysis**

Formatted: Font: 14 pt, Not Italic

Formatted: Font: 14 pt

498 We assessed each playback individually at each time scale to better contextualize the  
499 severity and, persistence of responses and whether dolphins increased or decreased their whistle  
500 behavior following sonar exposure, and directionality (*i.e.*, increase or decrease in whistle

Formatted: Indent: First line: 0.5"

501 count) of responses, which were not measured by either the modeling approach or changepoint  
502 analysis. The methods and results for the CEE-by-CEE analysis can be found in the  
503 supplementary materials (S12 FileAppendix).

#### 505 **Ethics Statement**

506 Animal research was conducted under authorization of the United States National Marine  
507 Fisheries Service marine mammal research permits 19116 and 19091.

Formatted: Don't add space between paragraphs of the same style

## 509 **Results and discussion**

Formatted: Font: 18 pt

510

Formatted: Font: 18 pt

### 511 **A. Characterization of baseline vocal behavior**

Formatted: Font: 16 pt

#### 512 **1. Basic dDescription**

Formatted: Font: 14 pt, Not Italic

Formatted: Font: 14 pt, Not Italic

513 This analysis includes nine control experiments, each conducted on separate days. Four  
514 control of these experiments were conducted with *Delphinus delphis*short-beaked common  
515 dolphins, and five were conducted with *Delphinus bairdii*long-beaked common dolphins (Table  
516 1). This resulted in 270 minutemins of baseline acoustic data for both speciessubspecies  
517 (pooled). The average group size across speciessubspecies was 190 individuals (range 45-300  
518 animals). The dispersion of of animals varied considerably within and between control  
519 experiments, including small to large groups (55-300 individuals) in tight to looselose  
520 organization, joint (in a single group with no subgroups), or spread out over several subgroups  
521 (range: 2-6) at tens to several hundreds of meters apart (range: 10-800 m).

Formatted: Font: 14 pt

Formatted: Indent: First line: 0.5"

Formatted: Font: Not Italic

522



533  
534 **Table 1. Summary of each controlled exposure experiment including controls (no sound**  
535 **emitted) and ‘simMFAS’ (playback of simulated mid-frequency active sonar). CEE-ID**  
536 contains denotes the year and the CEE number. Species abbreviations are Db for *D. bairdii* and  
537 Dd for *D. delphis* and Subspecies abbreviations are Db for *D. d. bairdii* and Dd for *D. d. delphis*,  
538 and the estimated group size is taken from shore observations. Received sound levels (RLs) are  
539 reported from by Durban et al. 2022 [29]. Median The median and interquartile range (IQR, 25-  
540 75th percentiles) are given for the raw whistle counts detections per second nd of the entire 30-  
541 minute min CEE. Changepoints were calculated on for both the mean whistle count and the  
542 variance in whistle count, separately for the pre-exposure and exposure periods. Note that  
543 “exposures” in controls were quiet periods for comparison compared to sound exposure in MFAS  
544 trials.

Formatted: Font: Italic

Formatted: Font: Italic

Formatted: Font: Italic

Formatted: Font: Italic

## 546 **2. Baseline Changepoint Analysis**

547 The baseline changepoint analysis revealed that mean detected whistle counts over the  
548 30-minute min control sampling periods changed once every minute min, and variance in detected  
549 whistle count counts changed once every 3.5 minute mins in control conditions.

Formatted: Font: 14 pt, Not Italic

Formatted: Font: 14 pt

Formatted: Indent: First line: 0.5"

## 551 **B. Assessing the impact of disturbance on whistle behavior**

552 A total of 10 MFAS CEEs were conducted -- eight seven of which included Delphinus  
553 bairdii, long-beaked common dolphins and two three of which included Delphinus delphis short-  
554 beaked common dolphins. The calculated average received level across all experiments was 151  
555 dB re 1µPa RMS (range 142-159 dB re 1µPa RMS, Table 1). The average group size for MFAS

Formatted: Font: 16 pt

Formatted: Indent: First line: 0.5"

Formatted: Font: Not Italic

Formatted: Font: Not Italic

Formatted: Font: Not Italic

556 CEEs was ~173 individuals (range 10-300, Table 1). For the changepoint analysis, all 10 MFAS  
557 experiments were included. However, for the assessment of changes in whistle behaviors across  
558 different time scales, we excluded CEE 2021\_11 (conducted with long-beaked common  
559 dolphins) had to be excluded because the overall lack of detected whistles could not be  
560 successfully modeled due to the lack of detected whistles, which prohibited its inclusion in the  
561 modeling. Consequently, the modeling results include nine controls and nine MFAS  
562 experiments.

Formatted: Font: Not Italic

## 564 **1. Number of changepoints in pre-exposure vs exposure**

Formatted: Font: 14 pt, Not Italic

Formatted: Font: 14 pt

Formatted: Indent: First line: 0.5"

565 Changepoint analysis was run for all control (9) and MFAS (10) experiments. The  
566 number of changepoints detected in both the mean and variance of whistle count during the pre-  
567 exposure and exposure periods are is presented in Table 1 for both controls and MFAS  
568 experiments. There was no significant increase or decrease in the mean and variance of detected  
569 whistle counts following MFAS exposure when compared to the natural variance present during  
570 control conditions. The difference ( $\Delta$ ) in change points in variance in of whistle detections count  
571 between the pre-exposure and exposure period did not differ significantly between controls and  
572 MFAS CEEs (controls: M = 3.1, SD = 1.4; MFAS: M = 2.5, SD = 2.3;  $t(17) = 0.69$ ,  $p = 0.5$ ). The  
573 same was true when comparing the mean whistle count between both experimental types  
574 (controls: M = 11.3, SD = 14.2; MFAS, M = 8.7, SD = 8.5;  $t(17) = 0.5$ ,  $p = 0.63$ ).

## 576 **2. Impact of MFAS exposure on whistle count: 10-minute min time scale**

Formatted: Font: 14 pt, Not Italic

Formatted: Font: 14 pt, Not Italic

Formatted: Font: 14 pt

Formatted: Indent: First line: 0.5"

577 Whistle counts detections did not change between the pre-exposure and exposure period  
578 during MFAS experiments at the 10-min time scale. At the 10-minute time scale, the The





|                                                                                                                                                                                                                      |                                        |          |       |    |      |
|----------------------------------------------------------------------------------------------------------------------------------------------------------------------------------------------------------------------|----------------------------------------|----------|-------|----|------|
| $\text{pingDiff} \sim \text{ceeType} + (1   \text{ceeNum}) + \text{subSpecies} \text{species} + \text{groupSize} + \text{buoyDist} + \text{medWhistle} \text{expMed} + \text{ar1}(\text{times} + 0   \text{ceeNum})$ | $\sim \text{medWhistle} \text{expMed}$ | gaussian | 2.6   | 12 | 10.1 |
| $\text{pingDiff} \sim \text{ceeType} + \text{ar1}(\text{times} + 0   \text{ceeNum})$                                                                                                                                 | $\sim \text{medWhistle} \text{expMed}$ | gaussian | 13.8  | 7  | 9.83 |
| $\text{pingDiff} \sim \text{ceeType} + (1   \text{ceeNum}) + \text{ar1}(\text{times} + 0   \text{ceeNum})$                                                                                                           | $\sim \text{medWhistle} \text{expMed}$ | gaussian | 15.8  | 8  | 9.83 |
| $\text{pingDiff} \sim \text{ceeType}$                                                                                                                                                                                | none                                   | gaussian | 207.8 | 3  | 10.9 |

590 Model formulas (conditional and zero-inflation if included) are listed for each time scale of  
 591 analysis, and within each time scale are given in ascending order of ΔAIC relative to the best  
 592 model (ΔAIC = 0).

594 **3. Characterize the impact of MFAS exposure on whistle count: 20-second**  
 595 **time scale**

596 Whistle counts detections did not differ significantly over the 20-second time windows  
 597 surrounding each ping. The preferred model at the 20 second 20-s scale included only predictor  
 598 variables for CEE type and median whistle count (Table 2). The results of this model showed  
 599 that CEE ceeType did not have a significant effect on changes in whistle count in the 20-  
 600 seconds 20 s after each ping (GLMM, n=18, slope = 0.47, SE = 0.27, P > 0.05, Table 2b), but  
 601 that the baseline median whistle count for that experimental period was a significant predictor for  
 602 the change in whistle count following a ping or ghost ping control treatment (GLMM, n = 19,  
 603 slope = 0.76, SE = 0.028, p = 0.0075).

605 **4. Characterize the impact of MFAS exposure on whistle count: 5-second time**  
 606 **scale**

607 The preferred model at the 5 second 5-s scale included the temporal autocorrelation  
 608 structure and three explanatory variables, CEE type, group size, and median whistle count, all of

- Formatted: Font: Italic
- Formatted: Font: Italic
- Formatted: Font: Italic
- Formatted: Font: Italic
- Formatted: Don't add space between paragraphs of the same style, Line spacing: Double
- Formatted: Font: Italic
- Formatted: Font: Italic
- Formatted: Font: Italic
- Formatted: Don't add space between paragraphs of the same style, Line spacing: Double
- Formatted: Font: Italic
- Formatted: Font: Italic
- Formatted: Font: Italic
- Formatted: Don't add space between paragraphs of the same style, Line spacing: Double
- Formatted: Font: Italic
- Formatted: Font: Italic
- Formatted: Font: Italic
- Formatted: Don't add space between paragraphs of the same style, Line spacing: Double
- Formatted: Font: Italic
- Formatted: Font: Not Bold
- Formatted: Font: Not Bold
- Formatted: Font: 14 pt, Not Italic
- Formatted: Font: 14 pt
- Formatted: Indent: First line: 0.5"
- Formatted: Font: 14 pt, Not Italic
- Formatted: Font: 14 pt
- Formatted: Indent: First line: 0.5"

609 which had a significant effect on the change in whistle count in the 5 seconds immediately  
610 following a ping compared to the 5 seconds immediately before a ping. When accounting for all  
611 other variables, the magnitude of the change in whistle count in the 5 seconds following a true an  
612 actual MFAS ping was 1.4 times greater than any change in whistle count following ghost pings  
613 in control CEEs control treatments (GLMM, n=18, slope = 1.43, SE = 0.47, p = 0.002, Ttable  
614 2c). The results of the CEE by CEE analysis (S2 Appendix S1 File) showed that in four five of  
615 the nine MFAS experiments in which sound was broadcasted, detected whistle counts were  
616 significantly elevated dolphins exhibited a significant elevation in whistle production in the 5-  
617 seconds 5 s after each ping for throughout the entire 10-minute exposure period, while in three  
618 of the nine MFAS exposures, animals showed an initial response to the first ping, with vocal  
619 responses slowly abating over the course of the experiment (plots of all raw whistles are  
620 provided in S2 Fig S3 Appendix). The effect was particularly pronounced (outside the 75<sup>th</sup>  
621 percentile; Appendix S2 Fig. S2.1 S3 Fig) in the first ping of six of the MFAS CEEs; whistle  
622 activity increased in the 5 seconds following the first MFAS ping up to 15 times the whistle  
623 count in the 5 seconds before the first MFAS ping (mean of all MFAS CEEs 3.9, SD  
624 5.2), compared to increases of only up to 1.4 times (mean 0.46, SD 0.88) at the first ghost ping of  
625 controls at the start of control treatments (Fig. 5, Appendix S2.1 S3 Fig). Additionally, group size  
626 and median whistle count for the exposure period were found to be significant predictor  
627 variables. Larger groups showed larger more extensive changes in whistle count following pings  
628 and ghost pings control treatments (GLMM, n=18, slope = 0.007, SE = 0.003, p = 0.008, Ttable  
629 2c), and when the median background whistle count was higher, so too were the changes  
630 following pings or and ghost pings control treatments (GLMM, n=18, slope = 0.25, SE = 0.048, p  
631 = < 0.005, Ttable 2).

632  
633 **Figure 5. (A) Spectrogram example of 5 seconds before and 5 seconds after the first ping**  
634 **for MFAS CEE 2021\_08, illustrating illustrates the large significant increase in whistle**  
635 **count immediately following the cessation of the ping. The grey area denotes where whistle**  
636 **detections were excluded due to the recorder distance exceeding 1.6 km.** Focal The focal group  
637 was comprised of approximately 30 long-beaked common dolphins. The MFAS signal can be  
638 seen between 3 and 4 kHz. (B) Boxplot of the change in whistle count from the 5 seconds before  
639 to the 5 seconds following each of the 24 pings for CEE 2021\_08. Boxplot shows median, 25th,  
640 and 75th percentiles, with raw whistle count changes as open gray circles. The change following  
641 the first ping is shown as a red star.

642

## 643 **Discussion** Discussion Conclusions

644 We present a hierarchical approach to quantifying the vocal response of large groups of  
645 common dolphins to Navy Sonar and find that the most pronounced acoustic response occurs  
646 within the 5-seconds following each ping during MFAS exposure. As in previous observational  
647 studies evaluating delphinid acoustic behavior (14), determining a singular behavioral response  
648 to MFAS presents several challenges. Multiple factors – including rapid changes in the  
649 behavioral state over the course of throughout the experiment and variation in group size and  
650 composition – make it difficult to assess whether ascribe changes in vocal behavior are due to  
651 disturbance or versus natural variability. To better understand typical acoustic variation among  
652 common dolphins, we assessed vocal behavior during control conditions We assessed vocal  
653 behavior during control conditions to understand typical acoustic variation among common  
654 dolphins and found. We found that they dolphins exhibited natural vocal state changes (identified

**Commented [SF3]:** I think ok to still call this Discussion and above just Results. The example in the formatting website has 'Results and discussion' but then the balloon on the side lists the possible sections as Results, Discussion

**Formatted:** Font: 18 pt

**Formatted:** Font: 18 pt

**Formatted:** Indent: First line: 0.25"

655 by the changepoint analysis) in whistle production approximately once every minute~~min~~. This  
656 rapid acoustic state switching informed our analytical approach, which utilized a range of  
657 temporal windows to test for changes in whistle count (~~5 s – 10 min~~10 minutes - 5 seconds)  
658 before and after MFAS exposure. Across the larger ~~longer~~ time windows selected,~~selected~~: we  
659 did not detect a changes~~shift~~ in whistle behavior that was attributable to MFAS. However, CEE  
660 type did have a significant effect on~~significantly affected~~ the change in whistle count in the 5-  
661 seconds immediately following a ping compared to the 5-seconds~~5 s following a ping compared~~  
662 ~~to the 5 s~~ immediately before a ping.

664 The initial selection of the ~~time~~ time-period~~period~~ over which behavior was assessed in  
665 response to Navy sonar (10\_-minutes) for this project was influenced by multiple factors,  
666 including the flight endurance of the drone used for calculating animal distance to our recording  
667 buoys (34), our ability to consistently track large groups of fast-moving dolphins, and other  
668 previous BRS methods ~~studies~~ using MFAS (e.g., ~~18, 37~~43, 21]). Many of the  
669 aforementioned ~~aforementioned~~ constraints are imposed by the logistics of field work~~fieldwork~~.  
670 An informed approach to identify~~identifying~~ behavioral responses to anthropogenic disturbances  
671 ~~sources~~ also requires some prior knowledge of the timing of behavioral state switching in the  
672 study species. For example, previous work with blue whales (*Balaenoptera musculus*) evaluated  
673 several behavioral metrics (e.g., maximum depth, dive time, ascent/descent rate) in responses to  
674 simulated MFAS exposure over a 30-minute time window [~~3761~~(43)]. This exposure duration  
675 (which included a 30-minute~~min~~ pre-exposure period) was adequate to capture a behavioral  
676 change given the typical duration of their dive cycles ((5-8 minute~~mins~~) [~~387~~], 44). In contrast,  
677 beaked whales are known to exhibit extremely~~incredibly~~ long, deep foraging dives that often last

Formatted: Indent: First line: 0.25"

678 over an hour, followed by long periods of recovery [(e.g., 39845,403946). Consequently, studies  
679 focused on direct measurements of behavioral response by Cuvier's beaked whales to MFAS  
680 extended their pre-exposure baseline period up to 9.3 hours and to perform sound exposure  
681 during foraging dives and evaluated their response to sonar for up to 1.7 hours after the exposure  
682 period [410](47).

684 While the 10-minute~~min~~ exposure period seemed appropriate given the fast-paced lifestyle of  
685 common dolphins, neither the aggregate model nor the individual assessment of each CEE  
686 detected a change in acoustic behavior that could be ascribed to sonar exposure at this time scale.  
687 Even when we explored variation in whistle production during the 20-seconds surrounding each  
688 ping, the experimental period was not a significant predictor of changes in whistle count in either  
689 the MFAS or control experiments, as vocal state switching often occurs within a 40 second~~20-s~~  
690 surrounding each ping, the experimental period was not a significant predictor of changes in  
691 whistle count in either the MFAS or control experiments, as vocal state switching often occurs  
692 within a 40-s time window under natural baseline conditions. While the impacts of sonar may be  
693 evident over the 10-minute exposure period for other behavioral metrics (*i.e.*, changes in  
694 behavioral state, group composition, diving behavior), our analysis reveals that changes in  
695 acoustic behavior are limited to an extremely narrow time-window~~time window~~ in these ~~two~~  
696 species~~subspecies~~.

698 It was only at the 5-second time scale surrounding each ping that we observed dolphins  
699 exhibiting an acute acoustic response, which often included a rapid increase in whistle  
700 production relative to the 5 seconds immediately prior to~~before~~ sound exposure. On average,

Formatted: Indent: First line: 0.25"

Formatted: Font: Italic

Formatted: Indent: First line: 0.25"

701 dolphins increased their whistle count 4~~four~~ times the average count in the 5 seconds preceding  
702 the first ping of the exposure. In one MFAS experiment, dolphins increased their whistle  
703 production 15 times compared to the whistle count in the 5 seconds immediately before the first  
704 ping (S3 Fig) (Appendix S2.1). This elevated vocal response following the first ping of the  
705 exposure was seen in six of the nine MFAS exposures where whistles were present.

707 Elevations in whistle counts detections did not occur during the sonar signal transmission  
708 itself – which lasted for 1.6 seconds. Rather, the elevated increased vocal production occurred  
709 once the signal had been transmitted, often abating within ~ 10 seconds. The lack of whistle  
710 production occurring during the sonar transmission may be a tactic for reducing acoustic  
711 interference and masking, which has been shown to impact the detection, discrimination, and  
712 localization of relevant signals [412](48). If the interfering signal is predictable (as is the case in  
713 our experiment), then animals should be able to adjust the timing of sound production to limit  
714 communication to periods in which noise is reduced [(e.g., 4214-4458-50)]. The ability of  
715 dolphins to learn the timing of intermittent noise has previously been demonstrated by Finneran  
716 et al., 2023 [421](51), who showed that individuals can modify their hearing sensitivity prior  
717 to~~before~~ the onset of predictably timed impulses, presumably to mitigate negative adverse  
718 auditory impacts. Surprisingly, little is known about their capacity to modify~~alter~~ the timing of  
719 vocal production in response to interfering signals under natural baseline conditions.

721 The sudden increase in vocal behavior following the first ping could be an example of the  
722 amplification of the behavior of group members through recruitment or reinforcement (*i.e.*,  
723 positive feedback), [45652]). In this scenario, one dolphin may whistle in response to a

Formatted: Indent: First line: 0.25"

Formatted: Indent: First line: 0.25"

724 surprising, salient stimuli and others . and others may follow suit. As this recruitment response  
725 continues, the number of dolphins producing whistles will increase\_s further, and information is  
726 spread rapidly throughout the group [(45763)]. In such cases, a few key individuals could  
727 catalyze the collective behavior of the rest of the group. While it would be difficult to evaluate  
728 this process using acoustic data alone, concurrent video data collected from the associated drone  
729 flights is currently being assessed to explore the spatial movement patterns of the group and  
730 identify those individuals that successfully initiate changes in group movement. Alternatively, it  
731 the rapid increase in vocal behavior following each ping could be an indicator that multiple  
732 animals are exchanging indicate that multiple animals exchange whistles to contact their closest  
733 social partners within the group in the presence of an unknown stimulus. This could be expected  
734 given the role of whistles in group cohesion and coordination [(2,48754)] .

Formatted: Font color: Black

736 Surprisingly, in the playbacks when dolphins showed a significant increase in vocal behavior  
737 in the 5-sec following the first ping (6 of 9 CEEs, S3 Fig), the severity of their acoustic response  
738 did not abate over the course of the exposure Whether animals continued to show an elevated  
739 acoustic response immediately following each ping varied between MFAS exposures. In four of  
740 the nine experiments in which sound was broadcasted, dolphins exhibited a significant elevation  
741 in whistle production in the 5-seconds after each ping throughout the entire 10-minute exposure  
742 period (S22 Appendix Fig). This suggests that in these cases, dolphins did not habituate to  
743 successive pings (*i.e.*, show a progressive decrease in the amplitude of a vocal behavioral  
744 response after repeated exposure). This observation is surprising given that However, in three of  
745 the nine MFAS exposures, animals showed an initial response to the first ping, with vocal  
746 responses slowly abating over the course of the experiment (S2 Appendix). Thethe population of

Formatted: Indent: First line: 0.25"

Formatted: Not Highlight

Formatted: Not Highlight



747 dolphins tested in this study likely live a large portion of their lives in areas that are regularly  
748 ensonified by Navy sonar, and thus may. Continued work is needed to confirm these initial  
749 findings; for example, future studies exhibit an attenuated response when compared to  
750 individuals not regularly exposed to MFAS. Future work could compare the responsiveness of  
751 animals animals' responsiveness in the Southern California Bight to nearby populations that occur  
752 in areas where Navy sonar is not regularly present (*e.g.*, Monterey Bay). Considering whether  
753 dolphins may be learning to modify their vocal behavior in response to repeated noise exposure  
754 may provide foundational evidence to support using vocal rates as a measure of sensitization or  
755 habituation to anthropogenic stimuli, as has been done in terrestrial species as in  
756 (45985.50,45961).

Formatted: Not Highlight

Formatted: Not Highlight

Formatted: Font color: Black

757  
758 Future management decisions mitigating the impact of sonar on oceanic delphinids should  
759 consider our reported results of clear responses during CEEs when analyses were conducted at  
760 the appropriate temporal resolution . With respect to Concerning the most recent methodology for  
761 assessing the relative response severity for free-ranging marine mammals to acoustic disturbance  
762 [(51057)] – had the acoustic response of animals to MFAS been pooled across the 10-minute min  
763 time window – common dolphins likely would have been assigned a behavioral response  
764 severity score of 0 (no response detected). However, when evaluating vocal behavior across a  
765 shorter time-time 5-second time window, this species' response would be elevated to a category  
766 3 severity animal's response would be elevated to a category three severity, which includes an  
767 increase in possible contact or alarm calls [(51057)]. Ultimately, continued work with this (and  
768 other closely related) species should also consider how observed behavioral responses vary with  
769 respect to other contextual parameters, including behavioral state, group composition (*e.g.*,

Formatted: Indent: First line: 0.25"

770 presence or absence of calves), seasonality, and environmental covariates. Concurrent efforts  
771 from this project aim to integrate passive acoustics with other remotely sensed datasets (*i.e.*,  
772 shore-based group tracking, and aerial photogrammetry) to identify group-level behavioral  
773 changes and quantify exposure-response relationships [498](58). Paired with energetic modeling  
774 methods [(*e.g.*, 2731,53259,54360)], these data can be used to link these observed short-term  
775 behavioral responses to long-term fitness outcomes in this species and inform the  
776 implementation of effective mitigation strategies.

777  
778 Our study has some limitations that can be addressed in future work. Given the close  
779 phylogenetic relationship between short-beaked (*Delphinus delphis*) and long-beaked common  
780 dolphins (*Delphinus bairdii*), [(55461,56562)], the basic description of baseline vocal behavior  
781 (*i.e.*, whistle count data) was combined across species subspecies in our analysis. However,  
782 recent work by Oswald et al. discovered unique species-specific whistle frequency contours in  
783 short-beaked common dolphins both subspecies, *D. delphis* and *D. bairdii* and  
784 suggested suggesting that these distinctive acoustic signals could help facilitate recognition  
785 between these two *Delphinus* species subspecies [576](38). An increase in sample size for both  
786 long-beaked and short-beaked common dolphins would provide a more detailed understanding of  
787 their baseline vocal behavior and allow for the exploration enable the exploration of whether each  
788 species subspecies shows a differential or similar response in whistle type whistle-type usage to  
789 MFAS. Additionally, photo-identification photo identification of individuals within these large,  
790 ephemeral groups is extremely difficult challenging. Consequently, it is unknown whether  
791 individual dolphins around Catalina Island were exposed more than once to the experimental  
792 treatment whether individual dolphins around Catalina Island were exposed more than once to the

Formatted: Indent: First line: 0.25"

793 experimental treatment is unknown. Future research could direct effort towards efforts toward  
794 other oceanic delphinids with smaller group sizes sizes where photo-identification is feasible  
795 and reliable (e.g., bottlenose or rough-toothed dolphins dolphins).  
796

797 In any behavioral experiment, the response of the individual or group that is tested should be  
798 measured and interpreted over a time-window time window that is informed by their natural  
799 behavior. We suggest that future work with other oceanic delphinid species explore baseline  
800 vocal rates a-priori and use information on vocal state-switching to inform the analysis time-  
801 window time window over which behavioral responses are measured. Given these species'  
802 susceptibility to frequent MFAS exposure in Navy operational areas, it is of particular interest to  
803 evaluate how repeated exposure influences responses animals' susceptibility to frequent MFAS  
804 exposure in Navy operational areas, evaluating how repeated exposure influences responses is of  
805 particular interest. Future work should continue to explore key critical factors that are likely to  
806 influence the probability of response among these large groups, including their behavioral state  
807 and their likely to affect the probability of response among these large groups, including their  
808 behavioral state and proximity to the sound source and received level at the onset of exposure.  
809

Formatted: Indent: First line: 0.25"

## 810 Acknowledgements Acknowledgments

811 Funding for this project was provided by the U.S. Navy's Office of Naval Research (Award  
812 Numbers N000141713132, N0001418IP-00021, N000141712887, N000141912572). Animal  
813 observations, octocopter flights over dolphins, close approaches and CEEs were conducted under  
814 NMFS permit, and CEEs were conducted under NMFS permits 19116 and 19091. Additionally,  
815 all activities reported in this study were reviewed and approved by the Institutional Animal Care

Formatted: Font: 18 pt

Formatted: Font: 18 pt

816 and Use Committee (IACUC Protocol No: CRC-2021-AUP-06, CRC-2021-AUP-08). We thank  
817 the *M/V Magician* and Captain Carl Mayhugh for support in the field, as well as the University  
818 of Southern California's Wrigley Institute for their hospitality throughout the duration of and the  
819 University of Southern California's Dornsife Wrigley Institute for Environment and  
820 Sustainability for their hospitality throughout this project. This project would not have been  
821 possible without the dedicated contribution of all members of the Tagless-BRS team. Thank you  
822 to Stacy DeRuiter for extensive advice on statistical modeling and analysis. Additionally, we  
823 appreciate the thoughtful feedback provided by Dr. Ari Friedlaender, Dr. Colleen Reichmuth, Dr.  
824 Peter Cook, and Dr. John Durban during analysis and manuscript preparation. We also thank  
825 Ryan Jones, who created the line drawings for Fig. 1.

Formatted: Font: Italic

## 827 **References**

- 828 1. Tyack PL. Acoustic communication under the Sea. In: Hopp SL, Owren MJ, Evans CS,  
829 editors. Animal acoustic communication. Springer Berlin / Heidelberg: Springer;  
830 1998.
- 831 2. Janik VM. Acoustic communication in delphinids. Adv Study Behav. 2009; ;40: 123–  
832 157.
- 833 3. Lammers MO, Oswald JN. Analyzing the acoustic communication of dolphins. In: Herzing  
834 DL, Johnson CM, editors. Dolphin communication and cognition: Past, present, and  
835 future. Cambridge: MIT Press; 2015. pp. 107-130.
- 836 4. Erbe C, Dunlop R, Dolman S. Effects of noise on marine mmammals. In: Slabbekoorn H,  
837 Dooling R, Popper A, Fay R, editors. Effects of anthropogenic noise on animals.  
838 New York : Springer; 2018.

- 839 5. Williams R, Wright AJ, Ashe E, Blight LK, Bruintjes R, Canessa R, et al. Impacts of  
840 anthropogenic noise on marine life: Publication patterns, new discoveries, and future  
841 directions in research and management. *Ocean Coast Manag.* 2015;115: 17–24.
- 842 6. Southall BL, Finneran JJ, Reichmuth C, Nachtigall PE, Ketten DR, Bowles AE, et al. Marine  
843 mammal noise exposure criteria: Updated scientific recommendations for residual hearing  
844 effects. *Aquat Mamm.* 2019;45(2): 125–232.
- 845 7. Hatch LT, Wahle CM, Gedamke Jason, Harrison Jolie, Laws Benjamin, Moore SE, et al. Can  
846 you hear me here? Managing acoustic habitat in US waters. *Endanger Species Res.*  
847 2016;30(1): 171–86.
- 848 8. Tyack PL, Janik VM. Effects of nNoise on aAcoustic sSignal pProduction in mMarine  
849 mMammals. In: Brumm H, editor. *Animal communication and noise Animal Signals*  
850 *and Communication.* New York: Springer; 2013. pp. 251-271.
- 851 9. Nowacek DP, Thorne LH, Johnston DW, Tyack PL. Responses of cetaceans to anthropogenic  
852 noise. *Mamm Rev.* 2007;37(2): 81–115.
- 853 10. Hastie G, Merchant ND, Götz T, Russell DJF, Thompson P, Janik VM. Effects of impulsive  
854 noise on marine mammals: investigating range-dependent risk. *Ecol Appl.* 2019;29:  
855 e01906.
- 856 11. Harris CM, Sadykova D, DeRuiter SL, Tyack PL, Miller PJO, Kvadsheim PH, et al. Dose  
857 response severity functions for acoustic disturbance in cetaceans using recurrent event  
858 survival analysis. *Ecosphere.* 2015;6(11): 1–14.
- 859 12. Southall EBL, Finneran JJ, Reichmuth C, Nachtigall PE, Ketten DR, Bowles AE, et al.  
860 Marine mammal noise exposure criteria: Updated scientific recommendations for residual  
861 hearing effects. *Aquat Mamm.* 2019;45(2): 125–232.

Formatted: Font: 12 pt

- 862 13. D'Amico A, Pittenger R. A brief history of active sonar. *Aquat Mamm.* 2009 Dec;35(4):  
863 426–34.
- 864 14. Henderson EE, Smith MH, Gassmann M, Wiggins SM, Douglas AB, Hildebrand JA.  
865 Delphinid behavioral responses to incidental mid-frequency active sonar. *J Acoust Soc*  
866 *Am.* 2014;136(4):2003–2014. Available from: <http://dx.doi.org/10.1121/1.4895681>
- 867 156. Oswald JN, Rankin S, Barlow J. The effect of recording and analysis bandwidth on acoustic  
868 identification of delphinid species. *J Acoust Soc Am.* 2004 Nov 1;116(5): 3178–3185.
- 869 16. Filadelfo R, Mintz J, Michlovich E, D'Amico A, Tyack PL, Ketten DR. Correlating military  
870 sonar use with beaked whale mass strandings: What do the historical data show? *Aquat*  
871 *Mamm.* 2009;35(4): 435–444.
- 872 17. Guan S, Brookens T. An overview of research efforts to understand the effects of underwater  
873 sound on cetaceans. Vol. 2, *Water Biology and Security.* 2023;2: 100141.
- 874 1821. Southall BL, DeRuiter SL, Friedlaender A, Stimpert AK, Goldbogen JA, Hazen E, et al.  
875 Behavioral responses of individual blue whales (*Balaenoptera musculus*) to mid-  
876 frequency military sonar. *Journal of Experimental Biology* *J Exp Biol.* 2019;222: (5).
- 877 1922. Sivle LD, Kvadsheim PH, Fahlman A, Lam FPA, Tyack PL, Miller PJO, et al. Changes in  
878 dive behavior during naval sonar exposure in killer whales, long-finned pilot whales, and  
879 sperm whales. *Frontiers in Physiology* *Front Physiol.* 2012; 11:3: 400. Available from:  
880 [www.frontiersin.org](http://www.frontiersin.org)
- 881 20. Deruiter SL, Boyd IL, Claridge DE, Clark CW, Gagnon C, Southall BL, et al. Delphinid  
882 whistle production and call matching during playback of simulated military sonar. *Mar*  
883 *Mamm Sci.* 2013;29(2): E46-E59.

- 884 [21. Ioannou CC, Laskowski KL. A multi-scale review of the dynamics of collective behaviour:](#)  
885 [from rapid responses to ontogeny and evolution. Philos Trans R Soc Lond, B,](#)  
886 [2023;10\(378\): 20220059.](#)
- 887 [22. Durbach IN, Harris CM, Martin C, Helble TA, Henderson EE, Ierley G, et al. Changes in the](#)  
888 [mMovement and cCalling bBehavior of mMinke wWhales \(\*Balaenoptera acutorostrata\*\)](#)  
889 [in Response to Navy Training. Front Mar Sci. 2021;8: 660122.](#)
- 890 [23. Rendell LE, Gordon JCD. Vocal response of long-finned pilot whales \(\*Globicephala melas\*\)](#)  
891 [to military sonar in the Ligurian Sea. Mar Mamm Sci. 1999;15\(1\): 198–204.](#)
- 892 [24. Miller PJO, Antunes RN, Wensveen PJ, Samarra FIP, Catarina Alves A, Tyack PL, et al.](#)  
893 [Dose-response relationships for the onset of avoidance of sonar by free-ranging killer](#)  
894 [whales. J Acoust Soc Am. 2014;135\(2\): 975–93.](#)
- 895 [25. DeRuiter SL, Boyd IL, Claridge DE, Clark CW, Gagnon C, Southall BL, et alTyack PL.](#)  
896 [Delphinid whistle production and call matching during playback of simulated military](#)  
897 [sonar. Mar Mamm Sci. 2013;2: 46-59.](#)
- 898 [26. Lara G, Bou-Cabo M, Llorens S, Miralles R, Espinosa V. Acoustical behavior of delphinid](#)  
899 [whistles in the presence of an underwater explosion event in the Mediterranean coastal](#)  
900 [waters of Spain. J Mar Sci. 2023;11\(4\): 780.](#)
- 901 [27. Keen KA, Beltran RS, Pirotta E, Costa DP. Emerging themes in population consequences of](#)  
902 [disturbance models. Proc R Soc B. 2021;288\(1957\): 20210325.](#)
- 903 [28. King SL, Connor RC, Montgomery SH. Social and vocal complexity in bottlenose dolphins.](#)  
904 [Trends Neurosci. 2022; 45: 881-883.](#)

905 [29. Durban JW, Southall BL, Calambokidis J, Casey C, Fearnbach H, Joyce TW, et al.](#)  
906 [Integrating remote sensing methods during controlled exposure experiments to quantify](#)  
907 [group responses of dolphins to navy sonar. Mar Pollut Bull. 2022;174: 113194.](#)

908 [30. Visser, F. Moving in concert: Social and migratory behaviour of dolphins and whales in the](#)  
909 [North Atlantic Ocean. PhD dissertation, University of Amsterdam. 2014.](#)

910 [31. Hager CA. Assessment of the performance of the near-bottom hydrophones of the US Navy](#)  
911 [Southern California offshore range in detecting, localizing and reconstructing 10-20KHZ](#)  
912 [odontocete whistles. PhD dissertation, Naval Postgraduate School. 2008.](#)

913 [32. Gillespie D, Mellinger DK, Gordon J, McLaren D, Redmond P, McHugh R, et al.](#)  
914 [PAMGUARD: Semiautomated, open-source software for real- time acoustic detection](#)  
915 [and localization of cetaceans. J Acoust Soc Am. 2009;125\(4\): 2547–2547.](#)

916

917 [332. Sakai T, Barlow, J, Griffiths, E, Oswald, J, Schmidt, V, et al. R Package ‘PAMpal’.](#)  
918 [2022. PAMmisc: Miscellaneous functions for passive acoustic analysis. 2023.](#)  
919 <https://CRAN.R-project.org/package=PAMmisc>

920 [34. R Core Team. R: A Language and Environment for Statistical Computing. R Foundation for](#)  
921 [Statistical Computing, Vienna, Austria. 2023. https://www.R-project.org/](#)

922 [33. Gillespie D, Mellinger DK, Gordon J, David McLaren, et al. PAMGUARD: Semiautomated,](#)  
923 [open-source software for real- time acoustic detection and localization of cetaceans. J](#)  
924 [Acoust Soc Am. 2009;125\(4\): 2547–2547.](#)

925 [354. Killick R, Eckley I. changepoint: An R package for changepoint analysis. J Stat Softw.](#)  
926 [2014;58\(3\): 1-9.](#)

Formatted: Indent: Left: 0", First line: 0"

Field Code Changed



- 927 [365. Brooks ME, Kristensen K, Van Benthem KJ, Magnusson A, Berg CW, Nielsen A, et al.](#)  
928 [\*glmmTMB\* balances speed and flexibility among packages for zero-inflated generalized](#)  
929 [linear mixed modeling. \*The R Journal\*. 2017;9\(2\): 378-400.](#)
- 930 [367. Goldbogen JA, Southall BL, DeRuiter SL, Calambokidis J, Friedlaender AS, Hazen EL, et](#)  
931 [al. Blue whales respond to simulated mid-frequency military sonar. \*Proc R Soc B\*.](#)  
932 [2013;280: 20130657.](#)
- 933 [387. Croll DA, Acevedo-Gutierrez A, Tershy BR, Urban-Ramirez J. The diving behavior of blue](#)  
934 [and fin whales: Is dive duration shorter than expected based on oxygen stores? \*Comp\*](#)  
935 [Biochem Physiol, Part A Mol Integ.](#) 2001;129(4): 797-809.
- 936 [398. Baird RW, Webster DL, Schorr GS, McSweeney DJ, Barlow J. Diel variation in beaked](#)  
937 [whale diving behavior. \*Mar Mamm Sci\*. 2008;24\(3\): 630–642.](#)
- 938 [4039. Shearer JM, Quick NJ, Cioffi WR, Baird RW, Webster D, Foley HJ, et al. Diving](#)  
939 [behaviour of Cuvier’s beaked whales \(\*Ziphius cavirostris\*\) off Cape Hatteras, North](#)  
940 [Carolina. \*R Soc Open Sci\*. 2019;1\(6\) 26\(2\): 181728.](#)
- 941 [410. Deruiter SL, Southall BL, Calambokidis J, Zimmer WMX, Sadykova D, Falcone EA, et al.](#)  
942 [First direct measurements of behavioural responses by Cuvier’s beaked whales to mid-](#)  
943 [frequency active sonar. \*Bio Lett\*. 2013;9: 20130223.](#)
- 944 [421. Finneran JJ, Schlundt CE, Bowman V, Jenkins K. Dolphins reduce hearing sensitivity in](#)  
945 [anticipation of repetitive impulsive noise exposures. \*J Acoust Soc Am\*. 2023;153\(6\): 3372.](#)
- 946 [432. Egnor SR, Wickelgren JG, Hauser MD. Tracking silence: adjusting vocal production to](#)  
947 [avoid acoustic interference. \*J Comp Physiol\*. 2007;193: 477-483.](#)
- 948 [443. Kiai A, Clemens J, Kössl M, Poeppel D, Hechavarría J et al. Flexible control of vocal timing](#)  
949 [in bats enables escape from acoustic interference. \*bioRxiv\*. 2023: 2023-05.](#)

Formatted: Font: Italic

- 950 [454. Munoz-Santos I, Rfos-Chelén AA. Vermilion flycatchers avoid singing during sudden peaks](#)  
951 [of anthropogenic noise. \*Acta ethologica\*. 2022;26\(3\): 201-210.](#)
- 952 [465. Bonabeau E, Theraulaz G, Deneubourg J.L, Aron S, Camazine S. Self-organization in social](#)  
953 [insects. \*Trends Ecol Evol\*. 1997;12\(188\).](#)
- 954 [476. Sumpter DJT. The principles of collective animal behaviour. \*Philos Trans R Soc Lond, B\*.](#)  
955 [2005;361: 5–22.](#)
- 956 [487. Caldwell MC, Caldwell DK. Vocalization of naive captive dolphins in small groups.](#)  
957 [\*Science\*. 1968;159\(3819\): 1121-1123.](#)
- 958 [498. Francis CD, Ortega CP, Cruz A. Noise pollution changes avian communities and species](#)  
959 [interactions. \*Curr Biol\*. 2009;19\(16\):1415–1419.](#)
- 960 [5049. Brown CL, Hardy AR, Barber JR, Fristrup KM, Crooks KR, Angeloni LM, et al. The effect](#)  
961 [of human activities and their associated noise on ungulate behavior. \*PloS One\*.](#)  
962 [2012;10;\(7\): e40505.](#)
- 963 [510. Southall BL, Tollit D, Amaral J, Clark CW, Ellison WT. Managing human activity and](#)  
964 [marine mammals: A biologically based, relativistic risk assessment framework. \*Front Mar\*](#)  
965 [\*Sci\*. 2023;10.](#)
- 966 [521. Harris CM, Thomas L, Falcone EA, Hildebrand J, Houser D, Kvadsheim PH, et al. Marine](#)  
967 [mammals and sonar: Dose- response studies, the risk- disturbance hypothesis and the role](#)  
968 [of exposure context. \*J Appl Ecol\*. 2018;55:396-404.](#)
- 969 [53.2. Harwood J, King S, Booth C, Donovan C, Schick RS, Thomas L, et al. Understanding the](#)  
970 [population consequences of acoustic disturbance for marine mammals. In Popper AN,](#)  
971 [Hawkins A, editors. \*The effects of noise on aquatic life II\*. New York: Springer; 2016. pp.](#)  
972 [417-423.](#)

**Formatted:** Don't add space between paragraphs of the same style

973 [543. McHuron EA, Adamczak S, Costa DP, Booth C. Estimating reproductive costs in marine](#)  
974 [mammal bioenergetic models: a review of current knowledge and data availability.](#)  
975 [Conserv Physiol. 2023;11\(1\): coac080.](#)

976 [554. Natoli A, Cañadas A, Peddemors VM, Aguilar A, Vaquero C, Fernandez-Piqueras P, et al.](#)  
977 [Phylogeography and alpha taxonomy of the common dolphin \(\*Delphinus\* sp.\). J Evol Biol.](#)  
978 [2006;19\(3\): 943-954.](#)

979 [565. McGowen MR, Tsagkogeorga G, Álvarez-Carretero S, Dos Reis M, Truebig M, Deaville](#)  
980 [R, et al. Reis M Dos, et al. Phylogenomic resolution of the cetacean tree of life using target](#)  
981 [sequence capture. Syst Biol. 2020;69\(3\): 479-501.](#)

982 [576. Oswald JN, Walmsley SF, Casey C, Fregosi S, Southall BL, Janik VM et al. Species](#)  
983 [information in whistle frequency modulation patterns of common dolphins. Phil Trans R](#)  
984 [Soc B. 2021;376: 20210046.](#)

985

986

987 15. Richardson WJ, Thomson DH, Greene CR, Malme CI. Marine mammal sounds. In: Marine  
988 Mammals and Noise. San Diego, CA: Academic Press; 1995.

989 16. Oswald JN, Rankin S, Barlow J. The effect of recording and analysis bandwidth on acoustic  
990 identification of delphinid species. J Acoust Soc Am. 2004 Nov 1;116(5):3178–85.

991 17. Filadelfo R, Mintz J, Michlovich E, D’Amico A, Tyack PL, Ketten DR. Correlating military  
992 sonar use with beaked whale mass strandings: What do the historical data show? Aquat Mamm.  
993 2009;35(4):435–44.

994 18. D’Amico A, Gisiner RC, Ketten DR, Hammock JA, Johnson C, Tyack PL, et al. Beaked  
995 whale strandings and naval exercises. Aquat Mamm. 2009;35(4):452–72.

Formatted: Indent: Left: 0", Hanging: 0.44", Don't add space between paragraphs of the same style

Formatted: Don't add space between paragraphs of the same style

Formatted: Indent: Left: 0", First line: 0", Don't add space between paragraphs of the same style

- 996 19. Guan S, Brookens T. An overview of research efforts to understand the effects of underwater  
997 sound on cetaceans. Vol. 2, Water Biology and Security. Institute of Hydrobiology, Chinese  
998 Academy of Sciences; 2023; 2:100141.
- 999 20. Ioannou CC, Laskowski KL. A multi-scale review of the dynamics of collective behaviour:  
1000 from rapid responses to ontogeny and evolution. Philosophical Transactions of the Royal Society  
1001 B. 2023;378(1874):20220059. Available from: <https://doi.org/10.1098/rstb.2022.0059>
- 1002 21. Southall BL, DeRuiter SL, Friedlaender A, Stimpert AK, Goldbogen JA, Hazen E, et al.  
1003 Behavioral responses of individual blue whales (*Balaenoptera musculus*) to mid-frequency  
1004 military sonar. Journal of Experimental Biology. 2019;222(5).
- 1005 22. Sivle LD, Kvadsheim PH, Fahlman A, Lam FPA, Tyack PL, Miller PJO, et al. Changes in  
1006 dive behavior during naval sonar exposure in killer whales, long-finned pilot whales, and sperm  
1007 whales. Frontiers in Physiology. 2012; 11;3:400. Available from: [www.frontiersin.org](http://www.frontiersin.org)
- 1008 23. DeRuiter SL, Boyd IL, Claridge DE, Clark CW, Gagnon C, Southall BL, et al. Delphinid  
1009 whistle production and call matching during playback of simulated military sonar. Mar Mamm  
1010 Sci. 2013;29(2).
- 1011 24. Tyack PL, Zimmer WMX, Moretti D, Southall BL, Claridge DE, Durban JW, et al. Beaked  
1012 whales respond to simulated and actual navy sonar. PLoS One. 2011;6(3).
- 1013 25. Durbach IN, Harris CM, Martin C, Helble TA, Henderson EE, Ierley G, et al. Changes in the  
1014 Movement and Calling Behavior of Minke Whales (*Balaenoptera acutorostrata*) in Response to  
1015 Navy Training. Front Mar Sci. 2021;8.
- 1016 26. Rendell LE, Gordon JCD. Vocal response of long-finned pilot whales (*Globicephala melas*)  
1017 to military sonar in the Ligurian Sea. Mar Mamm Sci. 1999;15(1):198–204.

- 1018 27. Miller PJO, Antunes RN, Wensveen PJ, Samarra FIP, Catarina Alves A, Tyack PL, et al.  
1019 Dose-response relationships for the onset of avoidance of sonar by free-ranging killer whales. *J*  
1020 *Acoust Soc Am*. 2014;135(2):975–93. Available from:  
1021 <http://asa.scitation.org/doi/10.1121/1.4861346>
- 1022 28. DeRuiter SL, Boyd IL, Claridge DE, Clark CW, Gagnon C, Southall BL, Tyack PL.  
1023 Delphinid whistle production and call matching during playback of simulated military sonar.  
1024 *Marine Mammal Science*. 2013 Apr;29(2):E46-59. Available from:  
1025 <https://onlinelibrary.wiley.com/doi/10.1111/j.1748-7692.2012.00587.x>
- 1026 30. Lara G, Bou-Cabo M, Llorens S, Miralles R, Espinosa V. Acoustical Behavior of Delphinid  
1027 Whistles in the Presence of an Underwater Explosion Event in the Mediterranean Coastal Waters  
1028 of Spain. *Journal of Marine Science and Engineering*. 2023;11(4):780. Available from:  
1029 <https://doi.org/10.3390/jmse11040780>
- 1030 31. Keen KA, Beltran RS, Pirotta E, Costa DP. Emerging themes in population consequences of  
1031 disturbance models. *Proceedings of the Royal Society B*. 2021;288(1957):20210325.
- 1032 32. King SL, Connor RC, Montgomery SH. Social and vocal complexity in bottlenose dolphins.  
1033 Vol. 45, *Trends in Neurosciences*. Elsevier Ltd; 2022. p. 881–3.
- 1034 33. Cunha HA, Loizaga De Castro R, Secchi ER, Crespo EA, Lailson-Brito J, Azevedo AF, et al.  
1035 Molecular and morphological differentiation of common dolphins (*Delphinus* sp.) in the  
1036 Southwestern Atlantic: testing the two species hypothesis in sympatry. *PloS one*. 2015 Nov  
1037 11;10(11):e0140251.
- 1038 34. Durban JW, Southall BL, Calambokidis J, Casey C, Fearnbach H, Joyce TW, et al.  
1039 Integrating remote sensing methods during controlled exposure experiments to quantify group

1040 responses of dolphins to navy sonar. *Mar Pollut Bull.* 2022;174:113194. Available from:  
1041 <https://doi.org/10.1016/j.marpolbul.2021.113194>

1042 35. Southall BL, Moretti D, Abraham B, Calambokidis J, Deruiter SL, Tyack PL. Marine  
1043 mammal behavioral response studies in southern California: advances in technology and  
1044 experimental methods. *Marine Technology Society Journal.* 2012 Jul 1;46(4):48-59

1045 36. Visser, F. (2014). Moving in concert: Social and migratory behaviour of dolphins and  
1046 whales in the North Atlantic Ocean. PhD dissertation. University of Amsterdam. 2014.

1047 37. Hager CA. Assessment of the performance of the near-bottom hydrophones of the US Navy  
1048 Southern California offshore range in detecting, localizing and reconstructing 10-20KHZ  
1049 odontocete whistles. PhD dissertation. Naval Postgraduate School. 2008.

1050 38. Oswald JN, Walmsley SF, Casey C, Fregosi S, Southall B, Janik VM. Species information in  
1051 whistle frequency modulation patterns of common dolphins. *Phil Trans R Soc B.*  
1052 2021;376:20210046.

1053 39. Gillespie D, Mellinger DK, Gordon J, David McLaren, Redmond P, McHugh R, et al.  
1054 PAMGUARD: Semiautomated, open source software for real- time acoustic detection and  
1055 localization of cetaceans. *J Acoust Soc Am.* 2009;125(4):2547–2547.

1056 40. Sakai T et al. R Package ‘PAMpal’. <https://doi.org/10.1121/1.2743157>;2022.

1057 41. Killick R, Fearnhead P, Eckley IA. Killick R, Fearnhead P, Eckley IA. Optimal detection of  
1058 changepoints with a linear computational cost. *Journal of the American Statistical Association.*  
1059 2012 Dec 1;107(500):1590-8.

1060 42. Brooks ME, Kristensen K, Van Benthem KJ, Magnusson A, Berg CW, Nielsen A, et al.  
1061 glmmTMB balances speed and flexibility among packages for zero-inflated generalized linear

1062 mixed modeling. *The R journal*. 2017;9(2):378-400. Available from:  
1063 <https://doi.org/10.3929/ethz-b-000240890>

1064 43. Goldbogen JA, Southall BL, DeRuiter SL, Calambokidis J, Friedlaender AS, Haz EL, et al.  
1065 Blue whales respond to simulated mid-frequency military sonar. *Proceeding of the Royal Society*  
1066 *B*. 2013;280:20130657.

1067 44. Croll DA, Acevedo-Gutierrez A, Tershy BR, Urban-Ramirez J, Croll D. The diving behavior  
1068 of blue and fin whales: is dive duration shorter than expected based on oxygen stores?  
1069 *Comparative Biochemistry and Physiology Part A: Molecular & Integrative Physiology*. 2001 Jul  
1070 1;129(4):797-809.

1071 45. Baird RW, Webster DL, Schorr GS, McSweeney DJ, Barlow J. Diel variation in beaked  
1072 whale diving behavior. *Mar Mamm Sci*. 2008 Jul;24(3):630–42.

1073 46. Shearer JM, Quick NJ, Cioffi WR, Baird RW, Webster DL, Foley HJ, et al. Diving behaviour  
1074 of Cuvier’s beaked whales (*Ziphius cavirostris*) off Cape Hatteras, North Carolina. *R Soc Open*  
1075 *Sci*. 2019 Feb 1;6(2).

1076 47. Deruiter SL, Southall BL, Calambokidis J, Zimmer WMX, Sadykova D, Falcone EA, et al.  
1077 First direct measurements of behavioural responses by Cuvier ’ s beaked whales to mid-  
1078 frequency active sonar. 2013;9:20130223.

1079 48. Egnor SR, Wickelgren JG, Hauser MD. Tracking silence: adjusting vocal production to avoid  
1080 acoustic interference. *Journal of Comparative Physiology A*. 2007 Apr;193:477-83.

1081

1082 49. Kiai A, Clemens J, Kössl M, Poeppl D, Hechavarría JC. Flexible control of vocal timing in  
1083 bats enables escape from acoustic interference. *bioRxiv*. 2023:2023-05.

Formatted: Don't add space between paragraphs of the same style

Formatted: Indent: Left: 0", First line: 0", Don't add space between paragraphs of the same style

- 1084
- 1085 50. Munoz-Santos I, Ríos-Chelén AA. Vermilion flycatchers avoid singing during sudden peaks  
1086 of anthropogenic noise. *acta ethologica*. 2022 Dec 26:1-0.
- 1087
- 1088 51. Finneran JJ, Schlundt CE, Bowman V, Jenkins K. Dolphins reduce hearing sensitivity in  
1089 anticipation of repetitive impulsive noise exposures. *The Journal of the Acoustical Society of*  
1090 *America*. 2023 Jun 1;153(6):3372.
- 1091 52. Bonabeau E, Theraulaz G, Deneubourg J.L, Aron S, Camazine S. Self-organization in social  
1092 insects. *Trends Ecol Evol*. 1997;12(188).
- 1093 53. Sumpter DJT. The principles of collective animal behaviour. *Philosophical Transactions of*  
1094 *the Royal Society B*. 2005;361:5–22. Available from: <https://royalsocietypublishing.org/>
- 1095 54. Caldwell MC, Caldwell DK. Vocalization of naive captive dolphins in small groups. *Science*.  
1096 1968 Mar 8;159(3819):1121-3.
- 1097 55. Francis CD, Ortega CP, Cruz A. Noise Pollution Changes Avian Communities and Species  
1098 Interactions. *Current Biology*. 2009 Aug 25;19(16):1415–9.
- 1099 56. Brown CL, Hardy AR, Barber JR, Fristrup KM, Crooks KR, Angeloni LM. Brown CL,  
1100 Hardy AR, Barber JR, Fristrup KM, Crooks KR, Angeloni LM. The effect of human activities  
1101 and their associated noise on ungulate behavior. *PloS one*. 2012 Jul 10;7(7):e40505.
- 1102 57. Southall BL, Tollit D, Amaral J, Clark CW, Ellison WT. Managing human activity and  
1103 marine mammals: A biologically based, relativistic risk assessment framework. *Front Mar Sci*.  
1104 2023;10.
- 1105 58. Harris CM, Thomas L, Falcone EA, Hildebrand J, Houser D, et al. Marine mammals and  
1106 sonar: Dose- response studies, the risk- disturbance hypothesis and the role of exposure context.



1107 J Appl Ecol. 2018;55:396-404. Available from:  
 1108 <https://besjournals.onlinelibrary.wiley.com/doi/10.1111/1365-2664.12955>  
 1109 59. Harwood J, King S, Booth C, Donovan C, Schick RS, Thomas L, et al. Understanding the  
 1110 population consequences of acoustic disturbance for marine mammals. In *The effects of noise on*  
 1111 *aquatic life II 2016* (pp. 417-423). Springer New York.  
 1112 60. McHuron EA, Adamczak S, Costa DP, Booth C. Estimating reproductive costs in marine  
 1113 mammal bioenergetic models: a review of current knowledge and data availability. *Conservation*  
 1114 *Physiology*. 2023;11(1):coac080.  
 1115 61. Natoli A, Cañadas A, Peddemors VM, Aguilar A, Vaquero C, Fernandez- Piqueras P,  
 1116 Hoelzel AR. Phylogeography and alpha taxonomy of the common dolphin (*Delphinus* sp.).  
 1117 *Journal of Evolutionary Biology*. 2006 May;19(3):943-54.  
 1118 62. McGowen MR, Tsagkogeorga G, Álvarez-Carretero S, Reis M Dos, Struebig M, Deaville R,  
 1119 et al. Phylogenomic resolution of the cetacean tree of life using target sequence capture.  
 1120 *Systematic biology*. 2020 May 1;69(3):479-501.

1121 ▲

## **Supporting information**

1123 **S1 Fig. PAMGuard Whistle Detection Parameters. Detection settings for the PAMGuard**  
 1124 **Whistle and Moan Detector.**

1125 **S1 File. CEE-by-CEE Analysis. The main manuscript presents methods and results for**  
 1126 **analyzing common dolphin vocal response to simulated mid-frequency sonar, pooling data**  
 1127 **across from all CEEs. We acknowledge that some readers may be interested in additional**

**Formatted:** Font: Bold

**Formatted:** Font: 18 pt, Bold

**Formatted:** Don't add space between paragraphs of the same style

**Formatted:** Don't add space between paragraphs of the same style, Line spacing: Double

**Formatted:** Don't add space between paragraphs of the same style

1128 information about each of the 19 CEEs (10 MFAS exposures and nine controls), so we have  
1129 included additional methods and results for each CEE.

1130 **S2 Fig. Plots of raw per-second whistle detections for all included CEEs. CEE-ID (year and**  
1131 number) is given in the bottom right of each page. The red dashed line indicates the start of the  
1132 exposure period, with dashed grey lines indicating the timing of each ping (in an MFAS  
1133 exposure) or control treatment. The solid gray vertical line indicates the start of the post-  
1134 exposure period.

1135 **S3 Fig. Boxplots of the change in whistle count from the 5 s before to the 5 s following each**  
1136 of the 24 pings for all CEEs (MFAS and controls). Boxplot shows median, 25th, and 75th  
1137 percentiles, with raw whistle count changes as open gray circles. The change following the first  
1138 ping is shown as a red star.

1139

1140

#### 1141 **Author contributions**

1142 BLS acquired the funding for this project, and BLS, CC, and SF conceived, designed, and  
1143 performed the experiment. CC and SF analyzed the data, while BLS, VMJ, and JNO provided  
1144 analytical guidance. CC, SF, VMJ, JNO, and BLS wrote the manuscript.

Formatted: Font: Bold

Formatted: Font: Bold

Formatted: Don't add space between paragraphs of the same style, Line spacing: Double

Formatted: Font: Bold

Formatted: Font: Bold

Formatted: Font: Not Bold

Formatted: Font: Bold

Formatted: Line spacing: Double

Formatted: Font: Bold

Formatted: Font: Bold

Formatted: Font: Bold

Formatted: Font: Bold

Formatted: Don't add space between paragraphs of the same style, Line spacing: Double

Formatted: Font: 18 pt, Bold

Formatted: Don't add space between paragraphs of the same style
